# Supplementary material for: Tick-Tock Consider the Clock: The Influence of Circadian and External Cycles on Time of Day Variation in the Human Metabolome—A Review
Source: MDPI journal article supplement (doi:10.3390/metabo11050328), 2021-05-19
Supplement: s1 [file s1]

## % of Significantly Gradient Metabolites per Sample Type, Morning *vs* Evening Studies

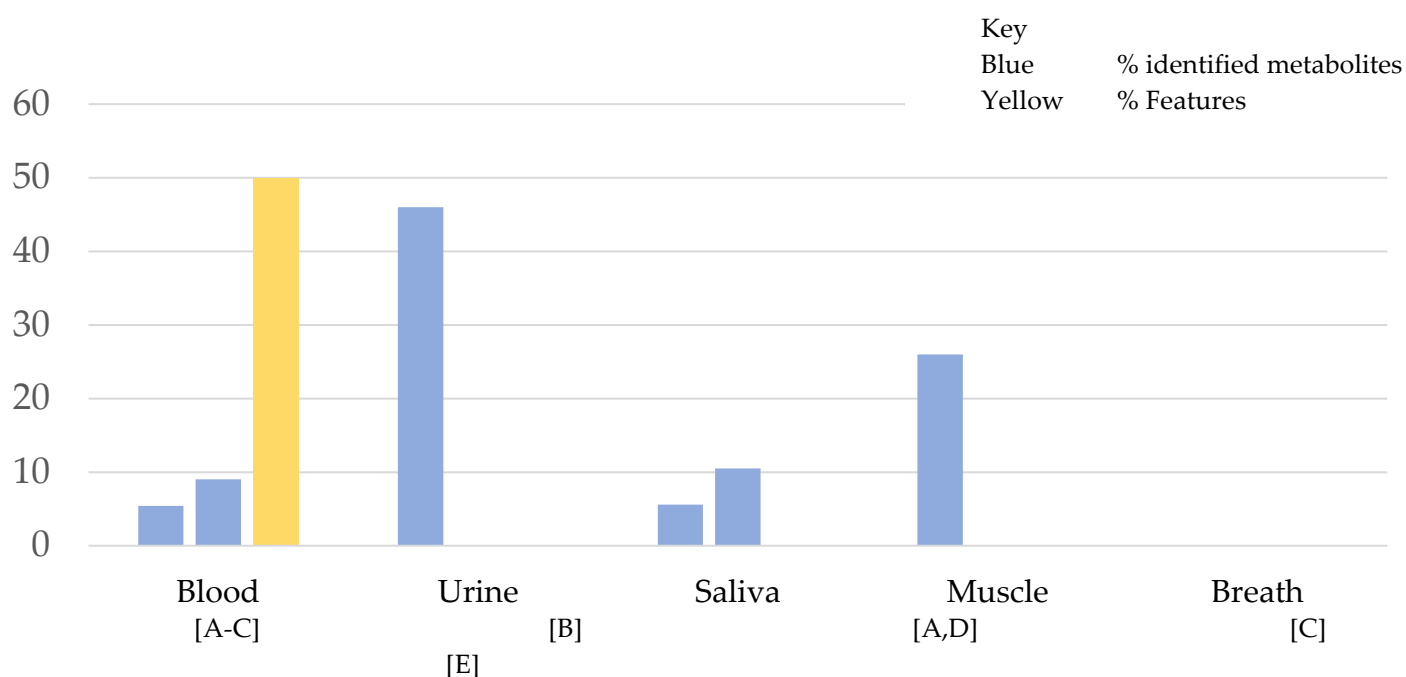

Figure S1: Percentage of observed metabolites/features undergoing a significant change between morning sample(s) and evening sample(s) as a function of rhythmic metabolites(features)/total metabolites(features).

Bars are indexed left to right

- A. [68]
- B. [67]
- C. [66]
- D. [76]
- E. [77]

Note: Total number of features observed in Sinues [76] study was not disclosed thus a % not calculated. The study and 'Breath' section is still presented to illustrate that such a study has taken place.

Data from [60,70,71] excluded as the total observed metabolites for these studies was not disclosed.

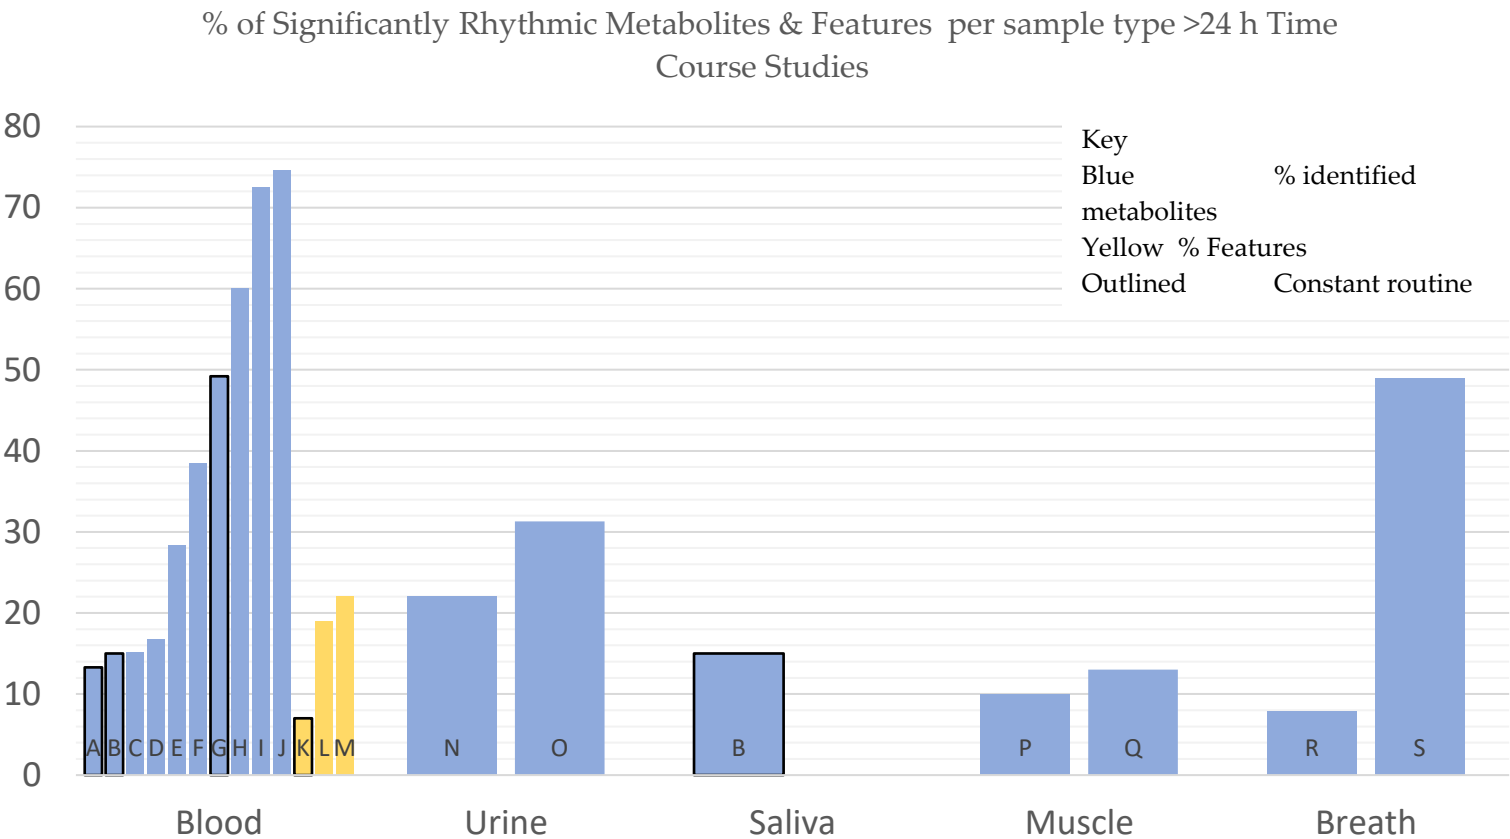

Figure S2: Percentage of observed significantly rhythmic metabolites and features as a function of rhythmic/total

Bars are indexed left to right

|         |         |
|---------|---------|
| A. [46] | K. [45] |
| B. [37] | L. [57] |
| C. [61] | M. [54] |
| D. [63] | N. [72] |
| E. [54] | O. [73] |
| F. [56] | P. [81] |
| G. [58] | Q. [80] |
| H. [59] | R. [79] |
| I. [52] | S. [78] |
| J. [55] |         |

The quoted % of rhythmic metabolites reflects the number of rhythmic metabolites of the total observed across any and all conditions tested, specific individual test groups therefore observed less than the % shown here for the following studies: Davies, Isherwood, Skene, Gu, Kervezee, Honma, Luszczek, for a more detailed breakdown please see Table 2

Jerjes [69] was excluded due to primarily focussing on cortisol and its derivatives, markers of rhythmicity, and would skew the % of observed rhythmicity in urine.

Data from Gehrman [62] excluded as the total observed metabolites for these studies was not disclosed.
