# Supplementary material for: Tick-Tock Consider the Clock: The Influence of Circadian and External Cycles on Time of Day Variation in the Human Metabolome—A Review
Source: Metabolites. 2021 May 19;11(5):328. doi: 10.3390/metabo11050328 (PMC8161100; doi:10.3390/metabo11050328)
Supplement: Supplementary file 1 [file metabolites-11-00328-s001.zip › Supplementary materials/Table S1-6.xlsx]

## Sheet: TS1-Common Rhythmic Metabolites
A list of significantly rhythmic/gradient metabolites ranked in order of frequency across the studies reported on in the main text. Metabolites oberserved to undergo significant time of day variation in at least five studies are highlighted in green and presented in table 6 of the main text. There is a total of 459 putative identifications, with 243 have been assigned an InChIKeys, of these 459, …				Checked
Names as reported in literature (Common metabolites have been grouped with synonyms seperated by "|")	Common name assigned	InChIKey	Frequency		Blood/Plasma Master List	Urine Master List	Saliva Master List	Muscle Master List	Breath Master List
Proline	Proline	ONIBWKKTOPOVIA-BYPYZUCNSA-N	11
Leucine	Leucine	ROHFNLRQFUQHCH-YFKPBYRVSA-N	10		1,2-Dilinoleoyl-GPC (18:2/18:2)	Creatinine	Acetate	1-(1-Enyl-Oleoyl)-GPE (P-18:1)	1-Butoxy, 2-Propanol
PC Aa C32:0	PC(32:0)	-	10		1,2-Dilinoleoyl-GPC (18:2/18:2)	Creatinine	Acetate	1-(1-Enyl-Palmitoyl)-2-Palmitoleoyl-GPC (P-16:0/16:1)	Acetone
L-Phenylalanine | Phenylalanine	Phenylalanine	COLNVLDHVKWLRT-QMMMGPOBSA-N	9		10-Heptadecenoate (17:1n7)	Creatinine	Ornithine	1-(1-Enyl-Palmitoyl)-GPE (P-16:0)	Camphene
Ornithine	Ornithine		9		10-Heptadecenoate (17:1n7)	Dimethylamine	Ornithine	1-(1-Enyl-Stearoyl)-2-Arachidonoyl-GPE (P-18:0/20:4)	Chloro-Benzene
Tyrosine	Tyrosine	OUYCCCASQSFEME-QMMMGPOBSA-N	9		13-HODE + 9-HODE	Dimethylamine	3-Dehydrocarnitine	1-(1-Enyl-Stearoyl)-2-Oleoyl-GPE (P-18:0/18:1)	Dimethoxymethane
Glutamate | Glutamic Acid	Glutamic acid	WHUUTDBJXJRKMK-VKHMYHEASA-N	8		13-HODE + 9-HODE	Xylose	3-Methyl-2-Oxobutyrate	1-(1-Enyl-Stearoyl)-GPE (P-18:0)	Isobutylacetate
Isoleucine	Isoleucine	AGPKZVBTJJNPAG-WHFBIAKZSA-N	8		17-Methylstearate	Xylose	3-Methyl-2-Oxovalerate	1,2-Dipalmitoyl-GPC (16:0/16:0)	Isoprene
LysoPC(18:2) and/or LysoPE (18:2)	LysoPC(18:2) and/or LysoPE (18:2)	-	8		17-Methylstearate	16-Androstenol	3-Phenylpropionate (Hydrocinnamate)	1,2-Dipalmitoyl-GPE (16:0/16:0)	Xylene
PC Aa C34:3 | PC(34:3)	PC(34:3)	-	8		1-Linolenoyl-GPC (18:3)	1-Methylnicotinamide	4-Hydroxyphenylacetate	10-Heptadecenoate (17:1n7)
Citrulline	Citrulline	RHGKLRLOHDJJDR-BYPYZUCNSA-N	7		1-Linolenoyl-GPC (18:3)	2-hydroxyisobutyrate	4-Methyl-2-Oxopentanoate	10-Nonadecenoate (19:1n9)
Taurine	Taurine	XOAAWQZATWQOTB-UHFFFAOYSA-N	7		1-Linoleoyl-2-Arachidonoyl-GPC (18:2/20:4n6)	3a,5a-Androstanediol	8-Hydroxyoctanoate	15-Methylpalmitate
Tryptophan	Tryptophan	QIVBCDIJIAJPQS-VIFPVBQESA-N	7		1-Linoleoyl-2-Arachidonoyl-GPC (18:2/20:4n6)	3-hydroxyisobutyrate	Abscisic Aicd, Methoxykynurenine	17-Methylstearate
Valine	Valine	KZSNJWFQEVHDMF-BYPYZUCNSA-N	7		1-Linoleoyl-2-Linolenoyl-GPC (18:2/18:3)	3-indoxyl sulfate	Arginine	1-Arachidonoyl-GPI (20:4)
1-Oleoyl-GPC (18:1) | 1-Oleoyl-GPE (18:1) | Lysopc A C18:1	LysoPC(18:1)	-	6		1-Linoleoyl-2-Linolenoyl-GPC (18:2/18:3)	4-DEA	Betaine	1-Linoleoyl-2-Arachidonoyl-GPC (18:2/20:4n6)
1-Palmitoyl-GPC (16:0) | Lysopc A C16:0 | Lysopc(16:0)	LysoPC(16:0)	-	6		1-Linoleoyl-GPC (18:2)	4-DTA	Biphosphoglycerates	1-Methylhistamine
Alpha-AAA, 2-Aminoadipate, Aminoadipate	Aminoadipic acid	OYIFNHCXNCRBQI-BYPYZUCNSA-N	6		1-Linoleoyl-GPC (18:2)	4-hydroxyphenylacetate	Cis-Aconitate	1-Methylhistidine
Citrate	Citric acid	KRKNYBCHXYNGOX-UHFFFAOYSA-N	6		1-Linoleoyl-GPE (18:2)	Acetate	Citrate	1-Oleoyl-2-Arachidonoyl-GPE (18:1/20:4)
Cortisone	Cortisone	MFYSYFVPBJMHGN-ZPOLXVRWSA-N	6		1-Linoleoyl-GPE (18:2)	Acetone	Creatine	1-Oleoyl-2-Arachidonoyl-GPI (18:1/20:4)
Creatinine	Creatinine	DDRJAANPRJIHGJ-UHFFFAOYSA-N	6		1-Oleoyl-2-Linoleoyl-GPE (18:1/18:2)	Allantoin	Creatinine	1-Oleoyl-2-Linoleoyl-GPE (18:1/18:2)
Glycine	Glycine	DHMQDGOQFOQNFH-UHFFFAOYSA-N	6		1-Oleoyl-2-Linoleoyl-GPE (18:1/18:2)	Ascorbate	Ethanolamine	1-Oleoylglycerol (18:1)
Kynurenine	Kynurenine	YGPSJZOEDVAXAB-UHFFFAOYSA-N	6		1-Oleoyl-GPE (18:1)	Carnitine	Fumarate	1-Oleoyl-GPC (18:1)
PC 36:2p | PC Ae C36:2	PC C36:2	-	6		1-Oleoyl-GPE (18:1)	Citrate	Galactose	1-Palmitoleoylglycerol (16:1)
Alanine	Alanine	QNAYBMKLOCPYGJ-REOHCLBHSA-N	5		1-Palmitoleoyl-2-Linolenoyl-GPC (16:1/18:3)	Formate	Glycine	1-Palmitoyl-2-Arachidonoyl-GPE (16:0/20:4)
Cortisol	Cortisol	JYGXADMDTFJGBT-VWUMJDOOSA-N	5		1-Palmitoleoyl-2-Linolenoyl-GPC (16:1/18:3)	Hippurate	Glycyltyrosine	1-Palmitoyl-2-Arachidonoyl-GPI (16:0/20:4)
Lysine	Lysine	KDXKERNSBIXSRK-YFKPBYRVSA-N	5		1-Palmitoyl-2-Linoleoyl-GPE (16:0/18:2)	Mannitol	Heptaethylene Glycol	1-Palmitoyl-2-Docosahexaenoyl-GPE (16:0/22:6)
Lysopc A C17:0	LysoPC(17:0)	-	5		1-Palmitoyl-2-Linoleoyl-GPE (16:0/18:2)	Phenylacetylglutamine	Histidine	1-Palmitoyl-2-Linoleoyl-GPC (16:0/18:2)
PC 34:1p | PC Ae C34:1	PC C34:1	-	5		1-Palmitoyl-2-Oleoyl-GPE (16:0/18:1)	Pregnanediol	Isobutyrate	1-Palmitoyl-2-Linoleoyl-GPE (16:0/18:2)
PC 34:2p | PC Ae C34:2	PC C34:2	-	5		1-Palmitoyl-2-Oleoyl-GPE (16:0/18:1)	Pregnanetriol	L-Alanine	1-Palmitoyl-2-Oleoyl-GPE (16:0/18:1)
PC Aa C32:1	PC(32:1)	-	5		1-Stearoyl-2-Linoleoyl-GPE (18:0/18:2)	Taurine	Levulinate (4-Oxovalerate)	1-Palmitoyl-2-Oleoyl-GPG (16:0/18:1)
Pregnenolone Sulfate, Pregn Steroid Monosulfate	Pregnenolone Sulfate	DIJBBUIOWGGQOP-OZIWPBGVSA-N	5		1-Stearoyl-2-Linoleoyl-GPE (18:0/18:2)	Testosterone	L-Leucine	1-Palmitoyl-2-Stearoyl-GPC (16:0/18:0)
Sarcosine	Sarcosine	FSYKKLYZXJSNPZ-UHFFFAOYSA-N	5		1-Stearoyl-2-Oleoyl-GPE (18:0/18:1)	TMAO	Methyl-4-Pyridone-5-Carboxamide, Oxypurinal, Xanthine	1-Stearoyl-2-Arachidonoyl-GPC (18:0/20:4)
SM(20:2)	SM(20:2)	-	5		1-Stearoyl-2-Oleoyl-GPE (18:0/18:1)	Trigonelline	N-Acetylgalactosamine	1-Stearoyl-2-Arachidonoyl-GPI (18:0/20:4)
Threonine	Threonine	AYFVYJQAPQTCCC-GBXIJSLDSA-N	5		2,3-Dihydroxyisovalerate		N-Acetylmethionine	1-Stearoyl-2-Arachidonoyl-GPS (18:0/20:4)
TMAO, Trimethylamine N-Oxide	Trimethylamine N-Oxide (TMAO)	UYPYRKYUKCHHIB-UHFFFAOYSA-N	5		2,3-Dihydroxyisovalerate		N-Carbamoylaspartate	1-Stearoyl-2-Docosahexaenoyl-GPC (18:0/22:6)
1-Methyl-His | 1-Methylhistidine	1-Methylhistidine	BRMWTNUJHUMWMS-LURJTMIESA-N	4		21-Hydroxypregnenolone Disulfate		Niacin	1-Stearoyl-2-Linoleoyl-GPS (18:0/18:2)
3-Hydroxyisobutyrate	3-Hydroxyisobutyric acid	DBXBTMSZEOQQDU-VKHMYHEASA-N	4		21-Hydroxypregnenolone Disulfate		P-Cresol Sulfate	1-Stearoyl-2-Oleoyl-GPE (18:0/18:1)
3-Methyl-2-Oxovalerate	3-Methyl-2-Oxopentanoic acid	ZPSBJVARKCHQDF-UHFFFAOYSA-N	4		2-Hydroxyoctanoate		Porphobilinogen	1-Stearoyl-2-Oleoyl-GPS (18:0/18:1)
4-Hydroxyphenylpyruvate	4-Hydroxyphenylpyruvic Acid	KKADPXVIOXHVKN-UHFFFAOYSA-N	4		2-Hydroxyoctanoate		Propionate	1-Stearoyl-GPE (18:0)
AC-C0 | Carnitine	Carnitine	PHIQHXFUZVPYII-ZCFIWIBFSA-O	4		2-Oxoarginine		Pyroglutamylglutamine	2,3-Dihydroxyisovalerate
AC-C2, Acetylcarnitine (C2), Acetylcarnitine (C2:0) | Acetylcarnitine	Acyl carnitine(2:0)	RDHQFKQIGNGIED-MRVPVSSYSA-O	4		2-Oxoarginine		Serine	2-Hydroxybutyrate/2-Hydroxyisobutyrate
Acetate	Acetic acid	QTBSBXVTEAMEQO-UHFFFAOYSA-N	4		3-Hydroxydecanoate		Succinate	2-Hydroxyglutarate
Alpha-Hydroxyisocaproate	2-Hydroxy-4-methylvaleric acid	LVRFTAZAXQPQHI-YFKPBYRVSA-N	4		3-Hydroxydecanoate		Tetraethylene Glycol	2-Methylbutyrylcarnitine (C5)
Arginine	Arginine	ODKSFYDXXFIFQN-BYPYZUCNSA-N	4		3-Hydroxyisobutyrate		Threonylphenylalanine	2-Stearoyl-GPE (18:0)
Bilirubin (E,E), Bilirubin (Z,Z)	Bilirubin	BPYKTIZUTYGOLE-IFADSCNNSA-N	4		3-Hydroxyisobutyrate		Trihydroxybutane	3-(4-Hydroxyphenyl)Lactate
Creatine	Creatine	CVSVTCORWBXHQV-UHFFFAOYSA-N	4		3-Methyl-2-Oxovalerate		Tyrosine	3-Hydroxy-3-Methylglutarate
Fumarate, Fumaric Acid	Fumaric acid	VZCYOOQTPOCHFL-OWOJBTEDSA-N	4		3-Methyl-2-Oxovalerate		Urea	3-Hydroxybutyrate (BHBA)
Glucose	Glucose	WQZGKKKJIJFFOK-VFUOTHLCSA-N	4		4-Guanidinobutanoate		Xanthine	3-Hydroxybutyrylcarnitine (1)
Glutamine	Glutamine	ZDXPYRJPNDTMRX-VKHMYHEASA-N	4		4-Guanidinobutanoate			3-Hydroxybutyrylcarnitine (2)
Histidine	Histidine	HNDVDQJCIGZPNO-YFKPBYRVSA-N	4		4-Hydroxyphenylpyruvate			3-Hydroxyisobutyrate
Lactate	Lactic acid	JVTAAEKCZFNVCJ-UWTATZPHSA-N	4		4-Hydroxyphenylpyruvate			3-Indoxyl Sulfate
Lysopc A C18:0	LysoPC(18:0)	-	4		5-Hydroxylysine			3-Methyl-2-Oxobutyrate
Lysopc A C26:0	LysoPC(26:0)	-	4		5-Hydroxylysine			3-Methyl-2-Oxovalerate
PC Aa C30:0	PC(30:0)	-	4		5-Hydroxylysine			3-Methylglutaconate
PC Aa C36:0	PC(36:0)	-	4		Acetoacetate			4-Methyl-2-Oxopentanoate
PC Aa C36:5	PC(36:5)	-	4		Acetoacetate			6-Phosphogluconate
PC Aa C40:2	PC(40:2)	-	4		Acisoga			Acetyl Coa
PC Aa C42:2	PC(42:2)	-	4		Acisoga			Acisoga
PC Ae C36:0	PC C36:0	-	4		Alanine			Adenine
PC Ae C38:2	PC C38:2	-	4		Alanine			Adenosine
PC Ae C44:3	PC C44:3	-	4		Alanine			Adenosine 3',5'-Cyclic Monophosphate (Camp)
Urea	Urea	XSQUKJJJFZCRTK-UHFFFAOYSA-N	4		Alanine			AICA Ribonucleotide
Xanthine	Xanthine	LRFVTYWOQMYALW-UHFFFAOYSA-N	4		Alanine			Alanylleucine
10-Heptadecenoate (17:1n7)	FA(17:1n7)	GDTXICBNEOEPAZ-FPLPWBNLSA-N	3		Alpha-AAA			Alpha-Hydroxyisovalerate
17-Methylstearate	15-Methyloctadecanoic acid	YETXGSGCWODRAA-UHFFFAOYSA-N	3		Alpha-AAA			Alpha-Ketoglutarate
1-Linoleoyl-2-Arachidonoyl-GPC (18:2/20:4n6)	PC(18:2/20:4n6)	ZZSZQATYGVHNLZ-PUMLCSCDSA-N	3		Alpha-AAA			Androstenediol (3beta,17beta) Disulfate (1)
1-Oleoyl-2-Linoleoyl-GPE (18:1/18:2)	PE(18:1/18:2)	-	3		Alpha-Hydroxyisocaproate			Androsterone Sulfate
1-Palmitoyl-2-Linoleoyl-GPE (16:0/18:2)	PE(16:0/18:2)	-	3		Alpha-Hydroxyisocaproate			Arabonate/Xylonate
1-Palmitoyl-2-Oleoyl-GPE (16:0/18:1)	PE(16:0/18:1)	-	3		Arabonate/Xylonate			Arachidate (20:0)
1-Stearoyl-2-Oleoyl-GPE (18:0/18:1)	PE(18:0/18:1)	-	3		Arabonate/Xylonate			Aspartate
1-Stearoyl-GPE (18:0) | 2-Stearoyl-GPE (18:0)	LysoPE(18:0)	-	3		Arginine			Behenate (22:0)
2,3-Dihydroxyisovalerate	2,3-Dihydroxy-3-methylbutanoic acid	JTEYKUFKXGDTEU-VKHMYHEASA-N	3		Arginine			Behenoyl Dihydrosphingomyelin (D18:0/22:0)
3-Hydroxybutyrate | 3-Hydroxybutyrate (BHBA)	3-Hydroxybutyric acid	WHBMMWSBFZVSSR-GSVOUGTGSA-N	3		Arginine			Beta-Citrylglutamate
4-Guanidinobutanoate | 4-Guanidinobutanoic Acid	4-Guanidinobutanoic Acid	TUHVEAJXIMEOSA-UHFFFAOYSA-N	3		Asparagine			Beta-Hydroxyisovalerate
4-Methyl-2-Oxopentanoate	4-Methyl-2-Oxopentanoic acid	BKAJNAXTPSGJCU-UHFFFAOYSA-N	3		Asparagine			Butyrylcarnitine (C4)
5-Hydroxylysine	5-Hydroxylysine	YSMODUONRAFBET-UHNVWZDZSA-N	3		Asparagine			Caffeine
AC-C18:1 | Oleoylcarnitine (C18:1)	Acyl carnitine(18:1)	IPOLTUVFXFHAHI-SEYXRHQNSA-N	3		Betaine			Cer34:1(-H2O)
AC-C3 | Propionylcarnitine (C3)	Acyl carnitine(3:0)	UFAHZIUFPNSHSL-UHFFFAOYSA-N	3		Betaine			Ceramide (D16:1/24:1, D18:1/22:1)
Acetone	Acetone	CSCPPACGZOOCGX-UHFFFAOYSA-N	3		Bilirubin (E,E)			Ceramide (D18:1/14:0, D16:1/16:0)
Acisoga	N-(3-acetamidopropyl) pyrrolidin-2-one	OAUYENAPBFTAQT-UHFFFAOYSA-N	3		Bilirubin (E,E)			Ceramide (D18:1/17:0, D17:1/18:0)
Arabonate/Xylonate	Arabonic acid/Xylonic acid	-	3		Bilirubin (Z,Z)			Ceramide (D18:1/20:0, D16:1/22:0, D20:1/18:0)
Asparagine	Asparagine	DCXYFEDJOCDNAF-REOHCLBHSA-N	3		Bilirubin (Z,Z)			Ceramide (D18:2/24:1, D18:1/24:2)
Betaine	Betaine	KWIUHFFTVRNATP-UHFFFAOYSA-O	3		Biliverdin			C-Glycosyltryptophan
C2	-	-	3		Biliverdin			Cholesterol
Choline	Choline	OEYIOHPDSNJKLS-UHFFFAOYSA-N	3		C10			Choline
Dihomo-Linoleate (20:2n6)	FA(20:2n6)	LNAVIIOBBICBIS-NBRVCOCJSA-N	3		C10			Choline Phosphate
Dihomo-Linolenate (20:3n3 Or N6)	FA(20:3n3/n6)	-	3		C12			CL74:10_C18:2
Docosadienoate (22:2n6)	FA(22:2n6)	HVGRZDASOHMCSK-HZJYTTRNSA-N	3		C12			Coenzyme A
Docosapentaenoate (N6 DPA; 22:5n6)	FA(22:5n6)	AVKOENOBFIYBSA-WMPRHZDHSA-N	3		C14:2			Creatine Phosphate
Fructose	Fructose	RFSUNEUAIZKAJO-ARQDHWQXSA-N	3		C14:2			Cysteine
Glycerol	Glycerol	PEDCQBHIVMGVHV-UHFFFAOYSA-N	3		C16			Cytidine
Heme	Heme	KABFMIBPWCXCRK-RGGAHWMASA-L	3		C16			Cytidine 5'-Diphosphocholine
Hippurate	Hippuric acid	QIAFMBKCNZACKA-UHFFFAOYSA-N	3		C18			Cytidine 5'-Monophospho-N-Acetylneuraminic Acid
Linolenate [Alpha Or Gamma; (18:3n3 Or 6)]	FA(18:3n3/n6)	-	3		C18			Cytidine-5'-Diphosphoethanolamine
Lysopc A C16:1	LysoPC(16:1)	-	3		C18:1			Dehydroisoandrosterone Sulfate (DHEA-S)
Lysopc A C20:3	LysoPC(20:3)	-	3		C18:1			Dihomo-Linoleate (20:2n6)
Lysopc A C20:4	LysoPC(20:4)	-	3		C2			Dihomo-Linolenate (20:3n3 Or N6)
Mannose	Mannose	WQZGKKKJIJFFOK-QTVWNMPRSA-N	3		C2			Dihydroxyacetone Phosphate (DHAP)
Methionine	Methionine	FFEARJCKVFRZRR-BYPYZUCNSA-N	3		C2			Dimethylglycine
Methionine Sulfoxide	Methionine Sulfoxide	QEFRNWWLZKMPFJ-UHFFFAOYSA-N	3		C3			Docosadienoate (22:2n6)
Myristoleate (14:1n5)	FA(14:1n5)	YWWVWXASSLXJHU-WAYWQWQTSA-N	3		C3			Docosapentaenoate (N6 DPA; 22:5n6)
N6-Acetyllysine, N-Acetylarginine	N6-Acetyllysine, N-Acetylarginine	DTERQYGMUDWYAZ-ZETCQYMHSA-N	3		C4			Eicosenoate (20:1)
N-Acetylarginine, Oleate/Vaccenate (18:1)	N-Acetylarginine, Oleate/Vaccenate (18:1)	-	3		C4			Erucate (22:1n9)
N-Acetylmethionine	N-Acetylmethionine	XUYPXLNMDZIRQH-LURJTMIESA-N	3		C5			Erythronate
Nonadecanoate (19:0)	FA(19:0)	ISYWECDDZWTKFF-UHFFFAOYSA-N	3		C5			Ethylmalonate
N-Palmitoyl-Sphinganine (D18:0/16:0)	N-Palmitoyl-Sphinganine (D18:0/16:0)	GCGTXOVNNFGTPQ-JHOUSYSJSA-N	3		C8			Fructose
PC Aa C28:1	PC(28:1)	-	3		C8			Galactonate
PC Aa C34:4	PC(34:4)	-	3		C9			Gamma-Glutamylcysteine
PC Aa C36:2	PC (36:2)	-	3		C9			Gamma-Glutamyl-Epsilon-Lysine
PC Aa C36:4	PC(36:4)	-	3		Caffeic Acid Sulfate			Gamma-Glutamylglutamine
PC Aa C36:6	PC(36:6)	-	3		Caffeic Acid Sulfate			Glccer28:2
PC Aa C38:4	PC(38:4)	-	3		Carnitine			Glccer32:1
PC Aa C40:5	PC(40:5)	-	3		Carnitine			Glccer34:1
PC Ae C30:0	PC C30:0	-	3		Choline			Glccer34:1(-H2O)
PC Ae C32:1	PC C32:1	-	3		Choline			Glccer42:1(-H2O)
PC Ae C34:0	PC C34:0	-	3		Citrate			Glccer42:2
PC Ae C34:3	PC C34:3	-	3		Citrate			Glccer42:2; Glccer42:1-OH(-H2O)
PC Ae C36:4	PC C36:4	-	3		Citric Acid			Glccer44:1(-H2O)
PC Ae C36:5	PC C36:5	-	3		Citric Acid			Glccer44:2(-H2O)
PC Ae C38:3	PC C38:3	-	3		Citrulline			Glcdhcer30:1(-H2O)
PC Ae C38:4	PC C38:4	-	3		Citrulline			Glcdhcer32:0(-H2O)
PC Ae C40:1	PC C40:1	-	3		Citrulline			Glcdhcer34:1
PC Ae C40:2	PC C40:2	-	3		Citrulline			Glcdhcer34:1; Glcdhcer34:0-OH(-H2O)
PC Ae C40:3	PC C40:3	-	3		Citrulline			Glcdhcer40:1; Glcdhcer40:0-OH(-H2O)
PC Ae C40:5	PC C40:5	-	3		Citrulline			Glcdhcer44:0
PC Ae C40:6	PC C40:6	-	3		Citrulline			Gluconate
Pyrraline	Pyrraline	VTYFITADLSVOAS-UHFFFAOYSA-N	3		Cortisol			Glucose
SDMA	SDMA	HVPFXCBJHIIJGS-LURJTMIESA-N	3		Cortisol			Glutamate
Serine	Serine	MTCFGRXMJLQNBG-REOHCLBHSA-N	3		Cortisol			Glutamate, Gamma-Methyl Ester
SM (OH) C14:1	SM(14:1(OH))	-	3		Cortisol			Glutathione, Reduced (GSH)
SM (OH) C16:1	SM(16:1(OH))	-	3		Cortisol			Glycerate
SM (OH) C22:2	SM(C22:2(OH))	-	3		Cortisone			Glycine
SM C18:0	SM(18:0)	-	3		Cortisone			Glycochenodeoxycholate
SM C18:1	SM(18:1)	-	3		Cortisone			Glycocholate
Spermidine	Spermidine	ATHGHQPFGPMSJY-UHFFFAOYSA-N	3		Cortisone			Glycodeoxycholate
Succinate	Succinic acid	KDYFGRWQOYBRFD-UHFFFAOYSA-N	3		Cortisone			Glycosyl-N-Palmitoyl-Sphingosine (D18:1/16:0)
Sulfate	Sulfate	QAOWNCQODCNURD-UHFFFAOYSA-N	3		Cortisone			Glycosyl-N-Stearoyl-Sphingosine (D18:1/18:0)
Uridine	Uridine	DRTQHJPVMGBUCF-XVFCMESISA-N	3		Creatine			Glycylvaline
Xylose	Xylose	SRBFZHDQGSBBOR-IOVATXLUSA-N	3		Creatine			Heme
1-(1-Enyl-Oleoyl)-GPE (P-18:1)	LysoPE(P-18:1)	-	2		Creatine			Hexanoylcarnitine (C6)
1-(1-Enyl-Palmitoyl)-GPC (P-16:0) | 1-(1-Enyl-Palmitoyl)-GPE (P-16:0)	LysoPC(P-16:0)	-	2		Creatinine			Indoleacetate
1-(1-Enyl-Stearoyl)-2-Oleoyl-GPE (P-18:0/18:1)	PE (P-18:0/18:1)	-	2		Creatinine			Indolelactate
1,2-Dilinoleoyl-GPC (18:2/18:2)	PC(18:2/18:2)	-	2		DAG 36:2			Isobutyrylcarnitine (C4)
10-Nonadecenoate (19:1n9)	FA(19:1n9)	BBOWBNGUEWHNQZ-KTKRTIGZSA-N	2		DAG 36:2			Isovalerylcarnitine (C5)
13-HODE + 9-HODE	13-HODE + 9-HODE		2		Dihomo-Linoleate (20:2n6)			Lactosyl-N-Nervonoyl-Sphingosine (D18:1/24:1)
15-Methylpalmitate	15-Methylhexadecanoic acid	IIUXHTGBZYEGHI-UHFFFAOYSA-N	2		Dihomo-Linoleate (20:2n6)			Lactosyl-N-Palmitoyl-Sphingosine (D18:1/16:0)
17alpha-Hydroxypregnenolone 3-Sulfate | 17alpha-Hydroxypregnenolone Sulfate	17alpha-Hydroxypregnenolone 3-Sulfate	OMOKWYAQVYBHMG-TVWVXWENSA-N	2		Dihomo-Linolenate (20:3n3 Or N6)			Laurylcarnitine (C12)
1-Arachidonoyl-GPI (20:4)	LysoPI(20:4n6)	-	2		Dihomo-Linolenate (20:3n3 Or N6)			Leucine
1-Linolenoyl-GPC (18:3)	LysoPC(18:3)	-	2		Docosadienoate (22:2n6)			Leucylglycine
1-Linoleoyl-2-Linolenoyl-GPC (18:2/18:3)	PC(18:2/18:3)	-	2		Docosadienoate (22:2n6)			Lidocaine
1-Methylnicotinamide	1-Methylnicotinamide	LDHMAVIPBRSVRG-UHFFFAOYSA-O	2		Docosapentaenoate (N6 DPA; 22:5n6)			Lignoceroylcarnitine (C24)
1-Oleoylglycerol (18:1) | 1-Oleoylglycerol (1-Monoolein)	MG(18:1)	-	2		Docosapentaenoate (N6 DPA; 22:5n6)			Linolenate [Alpha Or Gamma; (18:3n3 Or 6)]
1-Palmitoyl-2-Arachidonoyl-GPE (16:0/20:4)	PE(16:0/20:4)	-	2		Etiocholanolone Glucuronide			Linoleoyl Ethanolamide
1-Palmitoyl-2-Arachidonoyl-GPI (16:0/20:4)	PI(16:0/20:4)	-	2		Etiocholanolone Glucuronide			Linoleoyl-Arachidonoyl-Glycerol (18:2/20:4) [2]
1-Palmitoyl-2-Stearoyl-GPC (16:0/18:0)	PC(16:0/18:0)	-	2		Ferulic Acid 4-Sulfate			Linoleoyl-Linoleoyl-Glycerol (18:2/18:2) [2]
1-Palmitoylglycerophosphoinositol | 1-Palmitoyl-GPI (16:0)	LysoPI(16:0)	-	2		Ferulic Acid 4-Sulfate			Lysopc18:0
1-Stearoyl-2-Arachidonoyl-GPI (18:0/20:4)	PI(18:0/20:4)	-	2		Fructose			Lysopi
1-Stearoyl-2-Linoleoyl-GPE (18:0/18:2)	PE(18:0/18:2)	-	2		Fructose			Lysopi14:0
21-Hydroxypregnenolone Disulfate	21-Hydroxypregnenolone Disulfate	MOIQRAOBRXUWGN-WPWXJNKXSA-N	2		Fumaric Acid			Lysopi16:0
2-Hydroxybutyrate/2-Hydroxyisobutyrate	2-hydroxybutanoic acid/2-Hydroxy-2-methylpropionic acid		2		Fumaric Acid			Lysopi16:1
2-Hydroxyglutarate	2-Hydroxyglutaric acid	HWXBTNAVRSUOJR-UHFFFAOYSA-N	2		Gamma-Glutamylisoleucine			Lysopi18:0
2-Hydroxyoctanoate	2-Hydroxyoctanoic acid	JKRDADVRIYVCCY-UHFFFAOYSA-N	2		Gamma-Glutamylisoleucine			Lysopi18:1
2-Methylbutyrylcarnitine (C5)	2-Methylbutyrylcarnitine (C5)	IHCPDBBYTYJYIL-UHFFFAOYSA-N	2		Gamma-Glutamylleucine			Lysopi20:0
2-Oxoarginine	2-Oxoarginine	ARBHXJXXVVHMET-UHFFFAOYSA-N	2		Gamma-Glutamylleucine			Lysopi22:0
3-Hydroxy-3-Methylglutarate	3-Hydroxy-3-Methylglutaric acid	NPOAOTPXWNWTSH-UHFFFAOYSA-N	2		Gamma-Glutamylphenylalanine			Lysopi22:1
3-Hydroxybutyrylcarnitine (2)	3-Hydroxybutyrylcarnitine (2)		2		Gamma-Glutamylphenylalanine			Maleate
3-Hydroxydecanoate	3-Hydroxydecanoic acid	FYSSBMZUBSBFJL-UHFFFAOYSA-N	2		Gamma-Glutamylvaline			Maltose
3-Indoxyl Sulfate	3-Indoxyl Sulfate	BXFFHSIDQOFMLE-UHFFFAOYSA-N	2		Gamma-Glutamylvaline			Margarate (17:0)
3-Methoxycatechol Sulfate (1) | 3-Methoxycatechol Sulfate (2)	3-Methoxycatechol Sulfate	KWNPSWVOZWAPLW-UHFFFAOYSA-N	2		Glucose			Methionine Sulfoxide
3-Methyl-2-Oxobutyrate	3-Methyl-2-Oxobutanoic acid	QHKABHOOEWYVLI-UHFFFAOYSA-N	2		Glucose			Methylmalonate (MMA)
3-Methylglutaconate	3-Methylglutaconic acid	WKRBKYFIJPGYQC-DUXPYHPUSA-N	2		Glucose			Methylphosphate
4-Hydroxyphenylacetate	4-Hydroxyphenylacetic acid	XQXPVVBIMDBYFF-UHFFFAOYSA-N	2		Glutamate			Myristoleate (14:1n5)
Acetoacetate	Acetoacetic acid	WDJHALXBUFZDSR-UHFFFAOYSA-N	2		Glutamate			Myristoyl Dihydrosphingomyelin (D18:0/14:0)
Adenosine	Adenosine	OIRDTQYFTABQOQ-KQYNXXCUSA-N	2		Glutamate			N1-Methyl-4-Pyridone-3-Carboxamide
Allantoin	Allantoin	POJWUDADGALRAB-UHFFFAOYSA-N	2		Glutamate			N6-Acetyllysine
Alpha-Ketoglutarate	2-oxoglutaric acid	KPGXRSRHYNQIFN-UHFFFAOYSA-N	2		Glutamic Acid			N-Acetylalanine
Arachidate (20:0)	FA(20:0)	AYSGFBVOWSXJCN-UHFFFAOYSA-N	2		Glutamic Acid			N-Acetylasparagine
Aspartate	Aspartic acid	CKLJMWTZIZZHCS-REOHCLBHSA-N	2		Glutamic Acid			N-Acetylmethionine
Behenate (22:0)	FA(22:0)	UKMSUNONTOPOIO-UHFFFAOYSA-N	2		Glutamine			Nervonate (24:1n9)
Beta-Citrylglutamate	Beta-Citrylglutamate	GAQNUGISBQJMKO-YFKPBYRVSA-J	2		Glutamine			N-Formylmethionine
Biliverdin	Biliverdin	QBUVFDKTZJNUPP-BBROENKCSA-N	2		Glutamine			Nicotinamide
C10	-	-	2		Glutamine			N-Methylproline
C12	-	-	2		Glycerol			Nonadecanoate (19:0)
C14:2	-	-	2		Glycerol			N-Palmitoyl-Sphingadienine (D18:2/16:0)
C16	-	-	2		Glycerol			N-Palmitoyl-Sphinganine (D18:0/16:0)
C18	-	-	2		Glycine			N-Palmitoyl-Sphingosine (D18:1/16:0)
C18:1	-	-	2		Glycine			N-Stearoyl-Sphingadienine (D18:2/18:0)
C3	-	-	2		Glycine			N-Stearoyl-Sphinganine (D18:0/18:0)
C4	-	-	2		Glycine			N-Stearoyl-Sphingosine (D18:1/18:0)
C5	-	-	2		Glycochenodeoxycholate Glucuronide (1)			Oleate/Vaccenate (18:1)
C8	-	-	2		Glycochenodeoxycholate Glucuronide (1)			Oleoyl-Linolenoyl-Glycerol (18:1/18:3) [2]
C9	-	-	2		Heme			Oleoyl-Linoleoyl-Glycerol (18:1/18:2) [1]
Caffeic Acid Sulfate	Caffeic Acid Sulfate	VWQNTRNACRFUCQ-DUXPYHPUSA-N	2		Heme			Oleoyl-Linoleoyl-Glycerol (18:1/18:2) [2]
Caffeine	Caffeine	RYYVLZVUVIJVGH-UHFFFAOYSA-N	2		Hippurate			Oleoyl-Oleoyl-Glycerol (18:1/18:1) [1]
Ceramide (D18:1/14:0, D16:1/16:0)	Ceramide (D18:1/14:0, D16:1/16:0)		2		Hippurate			Oleoyl-Oleoyl-Glycerol (18:1/18:1) [2]
Ceramide (D18:1/17:0, D17:1/18:0)	Ceramide (D18:1/17:0, D17:1/18:0)		2		Histidine			Ornithine
Ceramide (D18:1/20:0, D16:1/22:0, D20:1/18:0)	Ceramide (D18:1/20:0, D16:1/22:0, D20:1/18:0)		2		Histidine			Orotate
Cholesterol	Cholesterol	HVYWMOMLDIMFJA-DPAQBDIFSA-N	2		Histidine			Palmitate (16:0)
Choline Phosphate	Choline Phosphate	YHHSONZFOIEMCP-UHFFFAOYSA-O	2		Hydantoin-5-Propionic Acid			Palmitoleate (16:1n7)
Cytidine	Cytidine	UHDGCWIWMRVCDJ-XVFCMESISA-N	2		Hydantoin-5-Propionic Acid			Palmitoyl Dihydrosphingomyelin (D18:0/16:0)
DAG 36:2	DG(36:2)		2		Isoleucine			Palmitoyl Ethanolamide
Dimethylamine	Dimethylamine	ROSDSFDQCJNGOL-UHFFFAOYSA-N	2		Isoleucine			Palmitoyl Sphingomyelin (D18:1/16:0)
Dimethylglycine	Dimethylglycine	FFDGPVCHZBVARC-UHFFFAOYSA-N	2		Isoleucine			Palmitoyl-Docosahexaenoyl-Glycerol (16:0/22:6) [1]
Eicosenoate (20:1)	FA(20:1)	BITHHVVYSMSWAG-KTKRTIGZSA-N	2		Isoleucine			Palmitoyl-Docosahexaenoyl-Glycerol (16:0/22:6) [2]
Erucate (22:1n9)	FA(22:1)	DPUOLQHDNGRHBS-KTKRTIGZSA-N	2		Isoleucine			Palmitoyl-Oleoyl-Glycerol (16:0/18:1) [2]
Erythronate	Erythronic acid	JPIJQSOTBSSVTP-PWNYCUMCSA-N	2		Isoleucine			PC(O-)30:4
Ethylmalonate	Ethylmalonic acid	UKFXDFUAPNAMPJ-UHFFFAOYSA-N	2		Isoleucine			PC(O)32:0
Etiocholanolone Glucuronide	Etiocholanolone Glucuronide	VFUIRAVTUVCQTF-SDHZCXLISA-N	2		Isoleucine			PC(O-)32:0
Ferulic Acid 4-Sulfate	Ferulic Acid 4-Sulfate	PZPATWACAAOHTJ-HWKANZROSA-N	2		Kynurenine			PC(O-)32:1
Formate	Formic acid	BDAGIHXWWSANSR-UHFFFAOYSA-N	2		Kynurenine			PC(O-)32:2
Galactonate	Galactonic acid	RGHNJXZEOKUKBD-MGCNEYSASA-N	2		Kynurenine			PC(O)32:6
Gamma-Glutamyl-Epsilon-Lysine	Gamma-Glutamyl-Epsilon-Lysine	JPKNLFVGUZRHOB-YUMQZZPRSA-N	2		Kynurenine			PC(O-)32:6
Gamma-Glutamylisoleucine	Gamma-Glutamylisoleucine	SNCKGJWJABDZHI-UHFFFAOYSA-N	2		Kynurenine			PC(O-)34:0
Gamma-Glutamylleucine	Gamma-Glutamylleucine	MYFMARDICOWMQP-UHFFFAOYSA-N	2		Kynurenine			PC(O-)34:3
Gamma-Glutamylphenylalanine	Gamma-Glutamylphenylalanine	XHHOHZPNYFQJKL-QWRGUYRKSA-N	2		Lactate			PC(O)34:4
Gamma-Glutamylvaline	Gamma-Glutamylvaline	AQAKHZVPOOGUCK-UHFFFAOYSA-N	2		Lactate			PC(O-)34:6
Gluconate	Gluconic acid	RGHNJXZEOKUKBD-SQOUGZDYSA-N	2		Lactate			PC(O)36:2
Glycerate	Glyceric acid	RBNPOMFGQQGHHO-UWTATZPHSA-N	2		Lactate			PC(O-)36:2
Glycochenodeoxycholate	Glycochenodeoxycholic acid	GHCZAUBVMUEKKP-GYPHWSFCSA-N	2		Leucine			PC(O)36:3
Glycochenodeoxycholate Glucuronide (1)	Glycochenodeoxycholate Glucuronide (1)		2		Leucine			PC(O-)36:3
Glycocholate	Glycocholic acid	RFDAIACWWDREDC-FRVQLJSFSA-N	2		Leucine			PC(O)36:4
Glycodeoxycholate	Glycodeoxycholic acid	WVULKSPCQVQLCU-ZMBDPXIHSA-N	2		Leucine			PC(O-)36:4
Hydantoin-5-Propionic Acid	Hydantoin-5-Propionic Acid	VWFWNXQAMGDPGG-UHFFFAOYSA-N	2		Leucine			PC(O)36:5
Indoleacetate	Indoleacetic acid	SEOVTRFCIGRIMH-UHFFFAOYSA-N	2		Leucine			PC(O-)36:5
Indolelactate	Indolelactic acid	XGILAAMKEQUXLS-UHFFFAOYSA-N	2		Linolenate [Alpha Or Gamma; (18:3n3 Or 6)]			PC(O)36:6
Isobutyrylcarnitine (C4)	Isobutanoyl carnitine	LRCNOZRCYBNMEP-UHFFFAOYSA-N	2		Linolenate [Alpha Or Gamma; (18:3n3 Or 6)]			PC(O-)36:6
Isovalerylcarnitine (C5)	3-methylbutanoic carnitine	IGQBPDJNUXPEMT-UHFFFAOYSA-N	2		Linoleoyl-Linoleoyl-Glycerol (18:2/18:2) [1]			PC(O-)38:4
Laurylcarnitine (C12)	Acyl carnitine(12:0)		2		Linoleoyl-Linoleoyl-Glycerol (18:2/18:2) [1]			PC(O-)38:5
Lidocaine	Lidocaine	NNJVILVZKWQKPM-UHFFFAOYSA-N	2		L-Leucine			PC(O-)38:6
Linoleoyl-Linoleoyl-Glycerol (18:2/18:2) [1]	DAG(18:2/18:2)		2		L-Leucine			PC30:0
Lysopc A C14:0	LysoPC(14:0)	-	2		L-Phenylalanine			PC32:1
Lysopc A C28:1	LysoPC(28:1)	-	2		L-Phenylalanine			PC32:2
Maleate	Malic acid	VZCYOOQTPOCHFL-UPHRSURJSA-N	2		Lysine			PC32:3
Maltose	Maltose	GUBGYTABKSRVRQ-DKBJLJRDSA-N	2		Lysine			PC34:0
Margarate (17:0)	FA(17:0)	KEMQGTRYUADPNZ-UHFFFAOYSA-N	2		Lysine			PC34:1
Methylmalonate (MMA)	Methylmalonic acid	ZIYVHBGGAOATLY-UHFFFAOYSA-N	2		Lysine			PC34:2
Methylphosphate	Methylphosphate	CAAULPUQFIIOTL-UHFFFAOYSA-N	2		Lysine			PC34:3
N1-Methyl-4-Pyridone-3-Carboxamide	N1-Methyl-4-Pyridone-3-Carboxamide	KTLRWTOPTKGYQY-UHFFFAOYSA-N	2		Lysopc A C14:0			PC34:4
N6,N6,N6-Trimethyllysine	N6,N6,N6-Trimethyllysine	MXNRLFUSFKVQSK-QMMMGPOBSA-N	2		Lysopc A C14:0			PC36:0
N-Acetylasparagine	N-Acetylasparagine	HXFOXFJUNFFYMO-BYPYZUCNSA-N	2		Lysopc A C16:0			PC36:3
N-Acetylcitrulline	N-Acetylcitrulline	WMQMIOYQXNRROC-UHFFFAOYSA-N	2		Lysopc A C16:0			PC36:4
N-Acetylglutamate	N-Acetylglutamate	RFMMMVDNIPUKGG-UHFFFAOYSA-N	2		Lysopc A C16:0			PC36:5
Nervonate (24:1n9)	FA(24:1n9)	GWHCXVQVJPWHRF-KTKRTIGZSA-N	2		Lysopc A C16:1			PC36:6
N-Formylmethionine	N-Formylmethionine	PYUSHNKNPOHWEZ-RXMQYKEDSA-N	2		Lysopc A C16:1			PC38:0
Nicotinamide	Nicotinamide	DFPAKSUCGFBDDF-UHFFFAOYSA-N	2		Lysopc A C16:1			PE(O-)34:3
N-Methylproline	N-Methylproline	CWLQUGTUXBXTLF-YFKPBYRVSA-N	2		Lysopc A C17:0			PE(O)34:4
N-Palmitoyl-Sphingadienine (D18:2/16:0)	N-Palmitoyl-Sphingadienine (D18:2/16:0)	XXWRZIYYFPIQHE-XPAOSYCESA-N	2		Lysopc A C17:0			PE(O-)34:4
N-Palmitoyl-Sphingosine (D18:1/16:0)	N-Palmitoyl-Sphingosine (D18:1/16:0)	YDNKGFDKKRUKPY-TURZORIXSA-N	2		Lysopc A C17:0			PE(O-)36:5
N-Stearoyl-Sphingadienine (D18:2/18:0)	N-Stearoyl-Sphingadienine (D18:2/18:0)	LBBFOWQGVUEADU-PLAFRHTASA-N	2		Lysopc A C17:0			PE(O-)38:6
N-Stearoyl-Sphinganine (D18:0/18:0)	N-Stearoyl-Sphinganine (D18:0/18:0)	KZTJQXAANJHSCE-OIDHKYIRSA-N	2		Lysopc A C17:0			PE32:0
N-Stearoyl-Sphingosine (D18:1/18:0)	N-Stearoyl-Sphingosine (D18:1/18:0)	VODZWWMEJITOND-BRORTWQVSA-N	2		Lysopc A C18:0			PE34:4
Oleoyl-Linoleoyl-Glycerol (18:1/18:2) [1]	DG(18:1/18:2)		2		Lysopc A C18:0			PE36:0
Orotate	Orotic acid	PXQPEWDEAKTCGB-UHFFFAOYSA-N	2		Lysopc A C18:0			PE38:0
Palmitoleate (16:1n7)	FA(16:1n7)	PJHOFUXBXJNUAC-KTKRTIGZSA-N	2		Lysopc A C18:0			PE38:1
Palmitoyl-Linoleoyl-Glycerol (16:0/18:2) [1]	DG(16:0/18:2)		2		Lysopc A C18:1			PE40:5
PC 32:2	PC(32:2)	-	2		Lysopc A C18:1			Phenol Sulfate
PC Aa C24:0	PC(24:0)	-	2		Lysopc A C18:1			Phenylalanine
PC Aa C32:3	PC(32:3)	-	2		Lysopc A C18:2			Phenyllactate (PLA)
PC Aa C34:2	PC(34:2)	-	2		Lysopc A C18:2			Phosphoethanolamine
PC Aa C36:1	PC (36:1)	-	2		Lysopc A C18:2			PI(O-)42:4
PC Aa C36:3	PC(36:3)	-	2		Lysopc A C18:2			PI28:4
PC Aa C38:0	PC(38:0)	-	2		Lysopc A C20:3			PI30:5
PC Aa C38:3	PC(38:3)	-	2		Lysopc A C20:3			PI32:0
PC Aa C38:5	PC(38:5)	-	2		Lysopc A C20:3			PI34:4
PC Aa C38:6	PC(38:6)	-	2		Lysopc A C20:4			PI38:2
PC Aa C40:3	PC(40:3)	-	2		Lysopc A C20:4			PI38:3
PC Aa C40:4	PC(40:4)	-	2		Lysopc A C20:4			PI40:1
PC Aa C40:6	PC(40:6)	-	2		Lysopc A C26:0			PI42:1
PC Aa C42:0	PC(42:0)	-	2		Lysopc A C26:0			PI42:2
PC Aa C42:1	PC(42:1)	-	2		Lysopc A C26:0			Pipecolate
PC Aa C42:4	PC(42:4)	-	2		Lysopc A C26:0			Proline
PC Aa C42:5	PC(42:5)	-	2		Lysopc A C28:1			Propionylcarnitine (C3)
PC Aa C42:6	PC(42:6)	-	2		Lysopc A C28:1			PS36:2
PC Ae C30:2	PC C30:2	-	2		Lysopc(16:0)			PS40:5
PC Ae C32:2	PC C32:2	-	2		Lysopc(16:0)			PS40:6
PC Ae C36:3	PC C36:3	-	2		Mannose			Pseudouridine
PC Ae C38:0	PC C38:0	-	2		Mannose			Pyrraline
PC Ae C38:5	PC C38:5	-	2		Mannose			Pyruvate
PC Ae C38:6	PC C38:6	-	2		Methionine			S-1-Pyrroline-5-Carboxylate
PC Ae C40:4	PC C40:4	-	2		Methionine			S-Adenosylhomocysteine (SAH)
PC Ae C42:1	PC C42:1	-	2		Methionine			S-Adenosylmethionine (SAM)
PC Ae C42:2	PC C42:2	-	2		Methionine Sulfoxide			S-Allylcysteine
PC Ae C42:3	PC C42:3	-	2		Methionine Sulfoxide			Sedoheptulose-7-Phosphate
PC Ae C42:4	PC C42:4	-	2		Myristoleate (14:1n5)			SM30:0-OH
PC Ae C42:5	PC C42:5	-	2		Myristoleate (14:1n5)			SM30:3-OH; SM32:0(-H2O)
PC Ae C44:4	PC C44:4	-	2		N6,N6,N6-Trimethyllysine			SM32:0
PC Ae C44:5	PC C44:5	-	2		N6,N6,N6-Trimethyllysine			SM32:0-OH(-H2O); SM32:1
PC Ae C44:6	PC C44:6	-	2		N-Acetylarginine			SM32:1-OH(-H2O); SM32:2
Phenyllactate (PLA)	Phenyllactic acid	VOXXWSYKYCBWHO-UHFFFAOYSA-N	2		N-Acetylarginine			SM32:2-OH
Phosphoethanolamine	Phosphoethanolamine	SUHOOTKUPISOBE-UHFFFAOYSA-N	2		N-Acetylcitrulline			SM34:0-OH
Pipecolate	Pipecolic acid	HXEACLLIILLPRG-UHFFFAOYSA-N	2		N-Acetylcitrulline			SM34:1-OH(-H2O); SM34:2
Pro-Hydroxy-Pro	Proyl-hydroxyproline	ONPXCLZMBSJLSP-CSMHCCOUSA-N	2		N-Acetylglutamate			SM34:2-OH
Prolylglycine	Prolylglycine	RNKSNIBMTUYWSH-UHFFFAOYSA-N	2		N-Acetylglutamate			SM36:2; SM36:1-OH(-H2O)
Pyridoxate	Pyridoxic acid	HXACOUQIXZGNBF-UHFFFAOYSA-N	2		Nonadecanoate (19:0)			SM36:2-OH
Pyruvate	Pyruvic acid	LCTONWCANYUPML-UHFFFAOYSA-N	2		Nonadecanoate (19:0)			SM38:1
S-1-Pyrroline-5-Carboxylate	S-1-Pyrroline-5-Carboxylate	DWAKNKKXGALPNW-UHFFFAOYSA-N	2		N-Palmitoyl-Sphinganine (D18:0/16:0)			SM38:1; SM38:0-OH(-H2O)
S-Allylcysteine	S-Allylcysteine	ZFAHNWWNDFHPOH-UHFFFAOYSA-N	2		N-Palmitoyl-Sphinganine (D18:0/16:0)			SM38:2-OH
SM (OH) C22:1	SM(C22:1(OH))	-	2		Oleoylcarnitine (C18:1)			SM40:1-OH
SM C16:0	SM(16:0)	-	2		Oleoylcarnitine (C18:1)			SM40:2
SM C16:1	SM(16:1)	-	2		Ornithine			SM40:2(-H2O)
SM C24:0	SM(24:0)	-	2		Ornithine			SM40:3-OH; SM42:0(-H2O)
SM C24:1	SM(24:1)	-	2		Ornithine			SM42:1-OH
SM C26:0	SM(26:0)	-	2		Ornithine			SM42:2
SM C26:1	SM(26:1)	-	2		Ornithine			SM42:2(-H2O)
S-Methylcysteine	S-Methylcysteine	IDIDJDIHTAOVLG-VKHMYHEASA-N	2		Ornithine			SM42:2-OH
Sphingomyelin (D18:1/18:1, D18:2/18:0)	Sphingomyelin (D18:1/18:1, D18:2/18:0)		2		Palmitate (16:0)			SM42:3; SM42:2-OH(-H2O)
Stachydrine	Stachydrine	CMUNUTVVOOHQPW-LURJTMIESA-N	2		Palmitate (16:0)			SM42:3-OH(-H2O)
Stearate (18:0)	FA(18:0)	QIQXTHQIDYTFRH-UHFFFAOYSA-M	2		Palmitoyl-Linoleoyl-Glycerol (16:0/18:2) [1]			SM42:3-OH; SM44:0(-H2O)
Stearoyl Ethanolamide	Stearoyl Ethanolamide	OTGQIQQTPXJQRG-UHFFFAOYSA-N	2		Palmitoyl-Linoleoyl-Glycerol (16:0/18:2) [1]			SM44:2
TAG 48:2	TG(48:2)	-	2		PC 32:2			S-Methylcysteine
TAG 48:3	TG(48:3)	-	2		PC 32:2			Sphingadienine
TAG 50:4	TG(50:4)	-	2		PC 34:1p			Sphinganine
TAG 52:5	TG(52:5)	-	2		PC 34:1p			Sphingomyelin (D17:1/16:0, D18:1/15:0, D16:1/17:0)
TAG 52:6	TG(52:6)	-	2		PC 34:2p			Sphingomyelin (D18:1/17:0, D17:1/18:0, D19:1/16:0)
TAG 54:3	TG(54:3)	-	2		PC 34:2p			Sphingomyelin (D18:1/18:1, D18:2/18:0)
TAG 54:4	TG(54:4)	-	2		PC 36:2p			Sphingomyelin (D18:1/20:1, D18:2/20:0)
TAG 54:5	TG(54:5)	-	2		PC 36:2p			Stachydrine
TAG 54:6	TG(54:6)	-	2		PC Aa C24:0			Stearate (18:0)
TAG 56:3	TG(56:3)	-	2		PC Aa C24:0			Stearoyl Ethanolamide
Thioproline	Thioproline	DZLNHFMRPBPULJ-VKHMYHEASA-N	2		PC Aa C28:1			Stearoyl Sphingomyelin (D18:1/18:0)
Trans-4-Hydroxyproline	Trans-4-Hydroxyproline	PMMYEEVYMWASQN-DMTCNVIQSA-N	2		PC Aa C28:1			Stearoyl-Arachidonoyl-Glycerol (18:0/20:4) [1]
Tyramine O-Sulfate	Tyramine O-Sulfate	DYDUXGMDSXJQFT-UHFFFAOYSA-N	2		PC Aa C28:1			Stearoyl-Linoleoyl-Glycerol (18:0/18:2) [2]
Urate	Uric acid	LEHOTFFKMJEONL-UHFFFAOYSA-N	2		PC Aa C30:0			Succinate
(Allo)Urocortisol-3-Glucuronide	(Allo)Urocortisol-3-Glucuronide	-	1		PC Aa C30:0			Sulfate
(N(1) + N(8))-Acetylspermidine	(N(1) + N(8))-Acetylspermidine	-	1		PC Aa C30:0			TAG44:6
1-(1-Enyl-Palmitoyl)-2-Palmitoleoyl-GPC (P-16:0/16:1)	PC(P-16:0/16:1)	-	1		PC Aa C30:0			TG44:6
1-(1-Enyl-Stearoyl)-2-Arachidonoyl-GPE (P-18:0/20:4)	PE(P-18:0/20:4)	-	1		PC Aa C32:0			TG50:3
1-(1-Enyl-Stearoyl)-GPE (P-18:0)	LysoPE (P-18:0)	-	1		PC Aa C32:0			Thioproline
1,2,3-Benzenetriol Sulfate (2)	1,2,3-Benzenetriol Sulfate (2)	-	1		PC Aa C32:0			Tiglylcarnitine (C5:1-DC)
1,2-Dilinoleoyl-GPE (18:2/18:2)	PE(18:2/18:2)	-	1		PC Aa C32:1			Trans-4-Hydroxyproline
1,3,7-Trimethylurate	1,3,7-Trimethyluric acid	BYXCFUMGEBZDDI-UHFFFAOYSA-N	1		PC Aa C32:1			Trimethylamine N-Oxide
10-Undecenoate (11:1n1)	FA(11:1n1)	FRPZMMHWLSIFAZ-UHFFFAOYSA-N	1		PC Aa C32:1			Tryptophan
12,13-Dihome	12,13-Dihome	CQSLTKIXAJTQGA-BTDPBSJTSA-N	1		PC Aa C32:1			Tryptophan Betaine
13-Methylmyristate	13-Methyltetradecanoic acid	ZOCYQVNGROEVLU-UHFFFAOYSA-N	1		PC Aa C32:1			Tyrosine
16-Androstenol	16-Androstenol	KRVXMNNRSSQZJP-PHFHYRSDSA-N	1		PC Aa C32:3			UDP-Glucuronate
16-Hydroxypalmitate	16-Hydroxyhexadecanoic acid	UGAGPNKCDRTDHP-UHFFFAOYSA-N	1		PC Aa C32:3			UDP-N-Acetylglucosamine/Galactosamine
1-Arachidonoyl-GPE (20:4n6)	LysoPE(20:4n6)	ROPRRXYVXLDXQO-XSQXPFHXSA-N	1		PC Aa C34:2			Urate
1-Arachidonylglycerol (20:4)	MG(20:4n6)	RCRCTBLIHCHWDZ-DOFZRALJSA-N	1		PC Aa C34:2			Urea
1-Butoxy, 2-Propanol	1-Butoxy, 2-Propanol	RWNUSVWFHDHRCJ-UHFFFAOYSA-N	1		PC Aa C34:3			Uridine
1-Dihomo-Linolenylglycerol (20:3)	MG(20:3)	-	1		PC Aa C34:3			Valine
1-Docosahexaenoylglycerol (22:6)	MG(22:6)	-	1		PC Aa C34:3			Valylglycine
1-Eicosadienoylglycerophosphocholine	LysoPC(20:2)	-	1		PC Aa C34:4			Xanthine
1-Linoleoyl-GPG (18:2)	LysoPG(18:2)	-	1		PC Aa C34:4
1-Linoleoyl-GPI (18:2)	LysoPI(18:2)	-	1		PC Aa C34:4
1-Methylhistamine	1-Methylhistamine	FHQDWPCFSJMNCT-UHFFFAOYSA-N	1		PC Aa C36:0
1-Methylimidazoleacetate	1-Methylimidazoleacetic acid	ZHCKPJGJQOPTLB-UHFFFAOYSA-N	1		PC Aa C36:0
1-Myristoyl-2-Palmitoyl-GPC (14:0/16:0)	PC(14:0/16:0)	-	1		PC Aa C36:0
1-Myristoylglycerol (14:0)	MG(14:0)	-	1		PC Aa C36:0
1-Oleoyl-2-Arachidonoyl-GPE (18:1/20:4)	PE(18:1/20:4)	-	1		PC Aa C36:1
1-Oleoyl-2-Arachidonoyl-GPI (18:1/20:4)	PI(18:1/20:4)	-	1		PC Aa C36:1
1-Oleoyl-2-Linoleoyl-GPC (18:1/18:2)	PC(18:1/18:2)	-	1		PC Aa C36:2
1-Oleoyl-2-Linoleoyl-GPI (18:1/18:2)	PI(18:1/18:2)	-	1		PC Aa C36:2
1-Palmitoleoylglycerol (16:1)	MG(16:1)	-	1		PC Aa C36:2
1-Palmitoyl-2-Arachidonoyl-GPC (16:0/20:4n6)	PC(16:0/20:4n6)	IIZPXYDJLKNOIY-JXPKJXOSSA-N	1		PC Aa C36:3
1-Palmitoyl-2-Docosahexaenoyl-GPE (16:0/22:6)	PE(16:0/22:6)	-	1		PC Aa C36:3
1-Palmitoyl-2-Linoleoyl-GPI (16:0/18:2)	PI(16:0/18:2)	-	1		PC Aa C36:4
1-Palmitoyl-2-Oleoyl-GPG (16:0/18:1)	PG(16:0/18:1)	-	1		PC Aa C36:4
1-Palmitoyl-2-Oleoyl-GPI (16:0/18:1)	PI(16:0/18:1)	-	1		PC Aa C36:4
1-Palmitoylglycerol (16:0)	MG(16:0)	-	1		PC Aa C36:5
1-Palmitoyl-GPE (16:0)	LysoPE(16:0)	-	1		PC Aa C36:5
1-Stearoyl-2-Arachidonoyl-GPC (18:0/20:4)	PC(18:0/20:4)	-	1		PC Aa C36:5
1-Stearoyl-2-Arachidonoyl-GPE (18:0/20:4)	PE(18:0/20:4)	-	1		PC Aa C36:5
1-Stearoyl-2-Arachidonoyl-GPS (18:0/20:4)	PS(18:0/20:4)	-	1		PC Aa C36:6
1-Stearoyl-2-Docosahexaenoyl-GPC (18:0/22:6)	PC(18:0/22:6)	-	1		PC Aa C36:6
1-Stearoyl-2-Linoleoyl-GPC (18:0/18:2)	PC(18:0/18:2)	-	1		PC Aa C36:6
1-Stearoyl-2-Linoleoyl-GPI (18:0/18:2)	PI(18:0/18:2)	-	1		PC Aa C38:0
1-Stearoyl-2-Linoleoyl-GPS (18:0/18:2)	PS(18:0/18:2)	-	1		PC Aa C38:0
1-Stearoyl-2-Oleoyl-GPI (18:0/18:1)	PI(18:0/18:1)	-	1		PC Aa C38:3
1-Stearoyl-2-Oleoyl-GPS (18:0/18:1)	PS(18:0/18:1)	-	1		PC Aa C38:3
2-Aminoheptanoate	2-Aminoheptanoic acid	RDFMDVXONNIGBC-UHFFFAOYSA-N	1		PC Aa C38:4
2-Aminophenol Sulfate	2-Aminophenol Sulfate	VSTZVCJQGSLNLL-UHFFFAOYSA-N	1		PC Aa C38:4
2-Hydroxy-3-Methylvalerate	2-Hydroxy-3-methylpentanoic acid	RILPIWOPNGRASR-RFZPGFLSSA-N	1		PC Aa C38:4
2-Hydroxybutyrate	2-hydroxybutanoic acid	AFENDNXGAFYKQO-VKHMYHEASA-N	1		PC Aa C38:5
2-Hydroxydecanoate	2-Hydroxydecanoic acid	GHPVDCPCKSNJDR-UHFFFAOYSA-N	1		PC Aa C38:5
2-Hydroxyhippurate (Salicylurate)	2-hydroxyhippuric acid	ONJSZLXSECQROL-UHFFFAOYSA-N	1		PC Aa C38:6
2-Hydroxyisobutyrate	2-Hydroxy-2-methylpropionic acid	BWLBGMIXKSTLSX-UHFFFAOYSA-N	1		PC Aa C38:6
2-Hydroxylauroylcarnitine	2-Hydroxylauroylcarnitine	PBBJEGGNZPXIGJ-UHFFFAOYSA-N	1		PC Aa C40:2
2-Hydroxynervonate	2-Hydroxynervonic acid	UFOOFOUFKSIFCD-KTKRTIGZSA-M	1		PC Aa C40:2
2-Hydroxyphenylacetate	2-Hydroxyphenylacetic acid	CCVYRRGZDBSHFU-UHFFFAOYSA-N	1		PC Aa C40:2
2-Isopropylmalate	2-Isopropylmalic acid	BITYXLXUCSKTJS-ZETCQYMHSA-N	1		PC Aa C40:2
2-Keto-3-Deoxy-Gluconate	2-Keto-3-Deoxy-Gluconic acid	WPAMZTWLKIDIOP-NQXXGFSBSA-N	1		PC Aa C40:3
2-Linoleoylglycerol (18:2)	MG(18:2)	-	1		PC Aa C40:3
2-Linoleoylglycerophosphoethanolamine	LysoPE(18:2)	-	1		PC Aa C40:4
2-Methylcitric Acid	2-methylcitrate	YNOXCRMFGMSKIJ-UHFFFAOYSA-N	1		PC Aa C40:4
2-Oleoylglycerophosphoethanolamine	LysoPE(18:1)	-	1		PC Aa C40:5
3-(3-Hydroxyphenyl)Propionate	3-(3-Hydroxyphenyl)Propionic acid	QVWAEZJXDYOKEH-UHFFFAOYSA-N	1		PC Aa C40:5
3-(4-Hydroxyphenyl)Lactate	3-(4-Hydroxyphenyl)Lactic acid	JVGVDSSUAVXRDY-UHFFFAOYSA-N	1		PC Aa C40:5
3a,5a-Androstanediol	3a,5a-Androstanediol	-	1		PC Aa C40:6
3-Aminoisobutyrate	3-Amino-2-methylpropanoic acid	QCHPKSFMDHPSNR-UHFFFAOYSA-N	1		PC Aa C40:6
3-Dehydrocarnitine	3-Dehydrocarnitine	YNOWULSFLVIUDH-UHFFFAOYSA-N	1		PC Aa C42:0
3-Hydroxy-2-Ethylpropionate	3-Hydroxy-2-Ethylpropionic acid	ZMZQVAUJTDKQGE-UHFFFAOYSA-N	1		PC Aa C42:0
3-Hydroxybutyrylcarnitine (1)	3-Hydroxybutyrylcarnitine (1)	UEFRDQSMQXDWTO-BDAKNGLRSA-N	1		PC Aa C42:1
3-Hydroxyhexanoate	3-Hydroxyhexanoic acid	HPMGFDVTYHWBAG-YFKPBYRVSA-N	1		PC Aa C42:1
3-Hydroxyhippurate	3-Hydroxyhippuric acid	XDOFWFNMYJRHEW-UHFFFAOYSA-N	1		PC Aa C42:2
3-Hydroxylaurate	3-Hydroxylauric acid	MUCMKTPAZLSKTL-UHFFFAOYSA-N	1		PC Aa C42:2
3-Hydroxyoctanoate	3-Hydroxyoctanoic acid	NDPLAKGOSZHTPH-UHFFFAOYSA-N	1		PC Aa C42:2
3-Hydroxypyridine Sulfate	3-Hydroxypyridine Sulfate	BDERIBJTVYFANV-UHFFFAOYSA-N	1		PC Aa C42:2
3-Methyl Catechol Sulfate (1)	3-Methyl Catechol Sulfate (1)	-	1		PC Aa C42:4
3-Methyladipate	3-Methyladipic acid	SYEOWUNSTUDKGM-YFKPBYRVSA-N	1		PC Aa C42:4
3-Methylcytidine	3-Methylcytidine	RDPUKVRQKWBSPK-ZOQUXTDFSA-N	1		PC Aa C42:5
3-Methyl-His	3-Methyl-His	JDHILDINMRGULE-LURJTMIESA-N	1		PC Aa C42:5
3-OH-Butyrate	3-hydroxybutanoic acid	WHBMMWSBFZVSSR-UHFFFAOYSA-M	1		PC Aa C42:6
3-Phenylpropionate (Hydrocinnamate)	Hydrocinnamic acid	XMIIGOLPHOKFCH-UHFFFAOYSA-N	1		PC Aa C42:6
3-Phosphoglycerate	3-Phosphoglyceric acid	OSJPPGNTCRNQQC-UHFFFAOYSA-N	1		PC Ae C30:0
3-Ureidopropionate	3-Ureidopropionic acid	JSJWCHRYRHKBBW-UHFFFAOYSA-N	1		PC Ae C30:0
4-Acetylphenol Sulfate	4-Acetylphenol Sulfate	HOFGLAYWQRGTKC-UHFFFAOYSA-N	1		PC Ae C30:0
4-Androsten-3alpha,17alpha-Diol Monosulfate (2)	4-Androsten-3alpha,17alpha-Diol Monosulfate (2)	-	1		PC Ae C30:2
4-DEA	4-DEA	-	1		PC Ae C30:2
4-DTA	4-DTA	-	1		PC Ae C32:1
4-Ethylphenylsulfate	4-Ethylphenylsulfate	DWZGLEPNCRFCEP-UHFFFAOYSA-N	1		PC Ae C32:1
4-Hydroxycoumarin	4-Hydroxycoumarin	VXIXUWQIVKSKSA-UHFFFAOYSA-N	1		PC Ae C32:1
4-Hydroxyhippurate	4-Hydroxyhippuric acid	ZMHLUFWWWPBTIU-UHFFFAOYSA-N	1		PC Ae C32:2
4-Imidazoleacetate	4-Imidazoleacetic acid	PRJKNHOMHKJCEJ-UHFFFAOYSA-N	1		PC Ae C32:2
4-Methylcatechol Sulfate	4-Methylcatechol Sulfate	-	1		PC Ae C34:0
4-Vinylguaiacol Sulfate	4-Vinylguaiacol Sulfate	FKCHAXAGQVCJPN-UHFFFAOYSA-N	1		PC Ae C34:0
4-Vinylphenol Sulfate	4-Vinylphenol Sulfate	IETVQHUKTKKBFF-UHFFFAOYSA-N	1		PC Ae C34:0
5-(Galactosylhydroxy)-L-Lysine	5-(Galactosylhydroxy)-L-Lysine	OWGKYELXGFKIHH-UHFFFAOYSA-N	1		PC Ae C34:1
5,5-Dimethyl-1-Pyrroline N-Oxide	5,5-Dimethyl-1-Pyrroline N-Oxide	VCUVETGKTILCLC-UHFFFAOYSA-N	1		PC Ae C34:1
5,6-Dihydrothymine	5,6-Dihydrothymine	NBAKTGXDIBVZOO-UHFFFAOYSA-N	1		PC Ae C34:1
5alpha-Androstan-3alpha,17beta-Diol Disulfate	5alpha-Androstan-3alpha,17beta-Diol Disulfate	JHFAETDERBWUOO-KHOSGYARSA-N	1		PC Ae C34:2
5alpha-Pregnan-3beta,20beta-Diol Monosulfate (1)	5alpha-Pregnan-3beta,20beta-Diol Monosulfate (1)	ZIVKBPVUJZDVBI-XFHAOOBSSA-N	1		PC Ae C34:2
5-Bromotryptophan	5-Bromotryptophan	KZDNJQUJBMDHJW-VIFPVBQESA-N	1		PC Ae C34:2
5-Dodecenoate (12:1n7)	FA(12:1n7)	IJBFSOLHRKELLR-FPLPWBNLSA-N	1		PC Ae C34:3
5-Methylthioadenosine (MTA)	5-Methylthioadenosine (MTA)	WUUGFSXJNOTRMR-IOSLPCCCSA-N	1		PC Ae C34:3
5-Oxoproline	5-Oxoproline	ODHCTXKNWHHXJC-VKHMYHEASA-N	1		PC Ae C34:3
6-Oxopiperidine-2-Carboxylate	6-Oxo-pipecolinic acid	FZXCPFJMYOQZCA-UHFFFAOYSA-N	1		PC Ae C36:0
6-Phosphogluconate	6-Phosphopgluconic acid	BIRSGZKFKXLSJQ-SQOUGZDYSA-N	1		PC Ae C36:0
8-Hydroxyoctanoate	8-Hydroxyoctanoic acid	KDMSVYIHKLZKET-UHFFFAOYSA-N	1		PC Ae C36:0
9,10-Dihome	9,10-Dihome	XEBKSQSGNGRGDW-GJWDQICYSA-N	1		PC Ae C36:0
Abscisic Aicd, Methoxykynurenine	Abscisic Acid, Methoxykynurenine	-	1		PC Ae C36:2
AC-C14:1	Acyl carnitine(14:1)	-	1		PC Ae C36:2
AC-C16	Acyl carnitine(16:0)	-	1		PC Ae C36:2
AC-C18	Acyl carnitine(18:0)	-	1		PC Ae C36:2
AC-C4	Acyl carnitine(4:0)	-	1		PC Ae C36:3
AC-C5	Acyl carnitine(5:0)	-	1		PC Ae C36:3
Acesulfame	Acesulfame	YGCFIWIQZPHFLU-UHFFFAOYSA-N	1		PC Ae C36:4
Acetyl CoA	Acetyl CoA	ZSLZBFCDCINBPY-ZSJPKINUSA-N	1		PC Ae C36:4
Acetylhlycine | Guanidineacetate | 1-(2-Hydroxyethyl)-1-Methylguanidine	Acetylhlycine | Guanidineacetate | 1-(2-Hydroxyethyl)-1-Methylguanidine	-	1		PC Ae C36:4
Acetyl-Ornithine	Acetyl-Ornithine	JRLGPAXAGHMNOL-LURJTMIESA-N	1		PC Ae C36:5
Aconitate [Cis Or Trans]	Aconitic acid	-	1		PC Ae C36:5
Adenine	Adenine	GFFGJBXGBJISGV-UHFFFAOYSA-N	1		PC Ae C36:5
Adenosine 3',5'-Cyclic Monophosphate (Camp)	Adenosine 3',5'-Cyclic Monophosphate (Camp)	IVOMOUWHDPKRLL-KQYNXXCUSA-N	1		PC Ae C38:0
Adipate	Adipic acid	WNLRTRBMVRJNCN-UHFFFAOYSA-N	1		PC Ae C38:0
Adipoylcarnitine (C6-DC)	Adipoylcarnitine (C6-DC)	BSVHAXJKBCWVDA-SNVBAGLBSA-O	1		PC Ae C38:2
Adpsgegdfxaegggvr	Adpsgegdfxaegggvr	DROFZMGQYLJNLQ-UHFFFAOYSA-N	1		PC Ae C38:2
Adrenate (22:4n6)	FA(22:4n6)	TWSWSIQAPQLDBP-DOFZRALJSA-N	1		PC Ae C38:2
Adrenoylcarnitine (C22:4)	Acyl carnitine(22:4)	-	1		PC Ae C38:2
AICA Ribonucleotide	AICA Ribonucleotide	NOTGFIUVDGNKRI-UUOKFMHZSA-N	1		PC Ae C38:3
Alanylleucine	Alanylleucine	RDIKFPRVLJLMER-UHFFFAOYSA-N	1		PC Ae C38:3
Alpha-Ketobutyrate	2-oxobutanoic acid	TYEYBOSBBBHJIV-UHFFFAOYSA-N	1		PC Ae C38:3
Androstenediol (3alpha, 17alpha) Monosulfate (2)	Androstenediol (3alpha, 17alpha) Monosulfate (2)	-	1		PC Ae C38:4
Androstenediol (3beta,17beta) Disulfate (1)	Androstenediol (3beta,17beta) Disulfate (1)	-	1		PC Ae C38:4
Androsterone Sulfate	Androsterone Sulfate	ZMITXKRGXGRMKS-HLUDHZFRSA-N	1		PC Ae C38:4
Anthranilate	Anthranilic acid	RWZYAGGXGHYGMB-UHFFFAOYSA-N	1		PC Ae C38:5
Arabinose	Arabinose	SRBFZHDQGSBBOR-HWQSCIPKSA-N	1		PC Ae C38:5
Arabitol/Xylitol	Arabitol/Xylitol	-	1		PC Ae C38:6
Arachidonate (20:4n6)	FA(20:4)	YZXBAPSDXZZRGB-DOFZRALJSA-M	1		PC Ae C38:6
Arachidonoylcarnitine (C20:4)	Acyl carnitine(20:4)	-	1		PC Ae C40:1
Arachidonoylcholine	Arachidonoylcholine	NJSSWIYQGNCVTH-SNPVRQPZSA-N	1		PC Ae C40:1
					PC Ae C40:1
					PC Ae C40:2
					PC Ae C40:2
					PC Ae C40:2
					PC Ae C40:3
					PC Ae C40:3
					PC Ae C40:3
					PC Ae C40:4
					PC Ae C40:4
					PC Ae C40:5
					PC Ae C40:5
					PC Ae C40:5
					PC Ae C40:6
					PC Ae C40:6
					PC Ae C40:6
					PC Ae C42:1
					PC Ae C42:1
					PC Ae C42:2
					PC Ae C42:2
					PC Ae C42:3
					PC Ae C42:3
					PC Ae C42:4
					PC Ae C42:4
					PC Ae C42:5
					PC Ae C42:5
					PC Ae C44:3
					PC Ae C44:3
					PC Ae C44:3
					PC Ae C44:3
					PC Ae C44:4
					PC Ae C44:4
					PC Ae C44:5
					PC Ae C44:5
					PC Ae C44:6
					PC Ae C44:6
					Phenylalanine
					Phenylalanine
					Phenylalanine
					Phenylalanine
					Phenylalanine
					Phenylalanine
					Pregn Steroid Monosulfate
					Pregn Steroid Monosulfate
					Pregnenolone Sulfate
					Pregnenolone Sulfate
					Pregnenolone Sulfate
					Pro-Hydroxy-Pro
					Pro-Hydroxy-Pro
					Proline
					Proline
					Proline
					Proline
					Proline
					Proline
					Proline
					Proline
					Proline
					Proline
					Prolylglycine
					Prolylglycine
					Pyridoxate
					Pyridoxate
					Pyrraline
					Pyrraline
					Sarcosine
					Sarcosine
					Sarcosine
					Sarcosine
					Sarcosine
					SDMA
					SDMA
					SDMA
					Serine
					Serine
					SM (OH) C14:1
					SM (OH) C14:1
					SM (OH) C14:1
					SM (OH) C16:1
					SM (OH) C16:1
					SM (OH) C16:1
					SM (OH) C22:1
					SM (OH) C22:1
					SM (OH) C22:2
					SM (OH) C22:2
					SM (OH) C22:2
					SM C16:0
					SM C16:0
					SM C16:1
					SM C16:1
					SM C18:0
					SM C18:0
					SM C18:0
					SM C18:1
					SM C18:1
					SM C18:1
					SM C20:2
					SM C20:2
					SM C20:2
					SM C20:2
					SM C20:2
					SM C24:0
					SM C24:0
					SM C24:1
					SM C24:1
					SM C26:0
					SM C26:0
					SM C26:1
					SM C26:1
					Spermidine
					Spermidine
					Spermidine
					Sulfate
					Sulfate
					TAG 48:2
					TAG 48:2
					TAG 48:3
					TAG 48:3
					TAG 50:4
					TAG 50:4
					TAG 52:5
					TAG 52:5
					TAG 52:6
					TAG 52:6
					TAG 54:3
					TAG 54:3
					TAG 54:4
					TAG 54:4
					TAG 54:5
					TAG 54:5
					TAG 54:6
					TAG 54:6
					TAG 56:3
					TAG 56:3
					Taurine
					Taurine
					Taurine
					Taurine
					Taurine
					Taurine
					Threonine
					Threonine
					Threonine
					Threonine
					Threonine
					Trimethylamine N-Oxide
					Trimethylamine N-Oxide
					Tryptophan
					Tryptophan
					Tryptophan
					Tryptophan
					Tryptophan
					Tryptophan
					Tyramine O-Sulfate
					Tyramine O-Sulfate
					Tyrosine
					Tyrosine
					Tyrosine
					Tyrosine
					Tyrosine
					Tyrosine
					Tyrosine
					Urea
					Urea
					Uridine
					Uridine
					Valine
					Valine
					Valine
					Valine
					Valine
					Valine
					Xanthine
					Xanthine
					(Allo)Urocortisol-3-Glucronide
					(N(1) + N(8))-Acetylspermidine
					1-(1-Enyl-Oleoyl)-GPE (P-18:1)
					1-(1-Enyl-Palmitoyl)-GPC (P-16:0)
					1-(1-Enyl-Stearoyl)-2-Oleoyl-GPE (P-18:0/18:1)
					1,2,3-Benzenetriol Sulfate (2)
					1,2-Dilinoleoyl-GPE (18:2/18:2)
					1,2-Dipalmitoyl-GPC (16:0/16:0)
					1,2-Dipalmitoyl-GPE (16:0/16:0)
					1,3,7-Trimethylurate
					10-Nonadecenoate (19:1n9)
					10-Undecenoate (11:1n1)
					12,13-Dihome
					13-Methylmyristate
					15-Methylpalmitate
					16-Hydroxypalmitate
					17alpha-Hydroxypregnenolone 3-Sulfate
					17alpha-Hydroxypregnenolone Sulfate
					1-Arachidonoyl-GPE (20:4n6)
					1-Arachidonoyl-GPI (20:4)
					1-Arachidonylglycerol (20:4)
					1-Dihomo-Linolenylglycerol (20:3)
					1-Docosahexaenoylglycerol (22:6)
					1-Eicosadienoylglycerophosphocholine
					1-Linoleoyl-GPG (18:2)
					1-Linoleoyl-GPI (18:2)
					1-Methyl-His
					1-Methylhistidine
					1-Methylimidazoleacetate
					1-Methylnicotinamide
					1-Myristoyl-2-Palmitoyl-GPC (14:0/16:0)
					1-Myristoylglycerol (14:0)
					1-Oleoyl-2-Linoleoyl-GPC (18:1/18:2)
					1-Oleoyl-2-Linoleoyl-GPI (18:1/18:2)
					1-Oleoylglycerol (1-Monoolein)
					1-Palmitoleoyl-2-Linoleoyl-GPC (16:1/18:2)
					1-Palmitoyl-2-Arachidonoyl-GPC (16:0/20:4n6)
					1-Palmitoyl-2-Arachidonoyl-GPE (16:0/20:4)
					1-Palmitoyl-2-Arachidonoyl-GPI (16:0/20:4)
					1-Palmitoyl-2-Linoleoyl-GPC (16:0/18:2)
					1-Palmitoyl-2-Linoleoyl-GPI (16:0/18:2)
					1-Palmitoyl-2-Oleoyl-GPI (16:0/18:1)
					1-Palmitoyl-2-Stearoyl-GPC (16:0/18:0)
					1-Palmitoylglycerol (16:0)
					1-Palmitoylglycerophosphoinositol
					1-Palmitoyl-GPC (16:0)
					1-Palmitoyl-GPE (16:0)
					1-Palmitoyl-GPI (16:0)
					1-Stearoyl-2-Arachidonoyl-GPE (18:0/20:4)
					1-Stearoyl-2-Arachidonoyl-GPI (18:0/20:4)
					1-Stearoyl-2-Linoleoyl-GPC (18:0/18:2)
					1-Stearoyl-2-Linoleoyl-GPI (18:0/18:2)
					1-Stearoyl-2-Oleoyl-GPI (18:0/18:1)
					1-Stearoyl-GPE (18:0)
					2-Aminoadipate
					2-Aminoheptanoate
					2-Aminophenol Sulfate
					2-Hydroxy-3-Methylvalerate
					2-Hydroxybutyrate
					2-Hydroxybutyrate/2-Hydroxyisobutyrate
					2-Hydroxydecanoate
					2-Hydroxyglutarate
					2-Hydroxyhippurate (Salicylurate)
					2-Hydroxylauroylcarnitine
					2-Hydroxynervonate
					2-Hydroxyphenylacetate
					2-Isopropylmalate
					2-Keto-3-Deoxy-Gluconate
					2-Linoleoylglycerol (18:2)
					2-Linoleoylglycerophosphoethanolamine
					2-Methylbutyrylcarnitine (C5)
					2-Methylcitric Acid
					2-Oleoylglycerophosphoethanolamine
					3-(3-Hydroxyphenyl)Propionate
					3-Aminoisobutyrate
					3-Hydroxy-2-Ethylpropionate
					3-Hydroxy-3-Methylglutarate
					3-Hydroxybutyrate
					3-Hydroxybutyrate (BHBA)
					3-Hydroxybutyrylcarnitine (2)
					3-Hydroxyhexanoate
					3-Hydroxyhippurate
					3-Hydroxylaurate
					3-Hydroxyoctanoate
					3-Hydroxypyridine Sulfate
					3-Methoxycatechol Sulfate (1)
					3-Methoxycatechol Sulfate (2)
					3-Methyl Catechol Sulfate (1)
					3-Methyladipate
					3-Methylcytidine
					3-Methylglutaconate
					3-Methyl-His
					3-OH-Butyrate
					3-Phosphoglycerate
					3-Ureidopropionate
					4-Acetylphenol Sulfate
					4-Androsten-3alpha,17alpha-Diol Monosulfate (2)
					4-Ethylphenylsulfate
					4-Guanidinobutanoic Acid, ?
					4-Hydroxycoumarin
					4-Hydroxyhippurate
					4-Hydroxyphenylpyruvic Acid
					4-Imidazoleacetate
					4-Methyl-2-Oxopentanoate
					4-Methylcatechol Sulfate
					4-Vinylguaiacol Sulfate
					4-Vinylphenol Sulfate
					5-(Galactosylhydroxy)-L-Lysine
					5,5-Dimethyl-1-Pyrroline N-Oxide
					5,6-Dihydrothymine
					5alpha-Androstan-3alpha,17beta-Diol Disulfate
					5alpha-Pregnan-3beta,20beta-Diol Monosulfate (1)
					5-Bromotryptophan
					5-Dodecenoate (12:1n7)
					5-Methylthioadenosine (MTA)
					5-Oxoproline
					6-Oxopiperidine-2-Carboxylate
					9,10-Dihome
					AC-C0
					AC-C14:1
					AC-C16
					AC-C18
					AC-C18:1
					AC-C2
					AC-C3
					AC-C4
					AC-C5
					Acesulfame
					Acetate
					Acetone
					Acetylcarnitine
					Acetylcarnitine (C2)
					Acetylcarnitine (C2:0)
					Acetylhlycine, Guanidineacetate, 1-(2-Hydroxyethyl)-1-Methylguanidine
					Acetyl-Ornithine
					Aconitate [Cis Or Trans]
					Adenosine
					Adipate
					Adipoylcarnitine (C6-DC)
					Adpsgegdfxaegggvr
					Adrenate (22:4n6)
					Adrenoylcarnitine (C22:4)
					Allantoin
					Alpha-Aminoadipic Acid
					Alpha-Hydroxyisovalerate
					Alpha-Ketobutyrate
					Alpha-Ketoglutarate
					Aminoadipate
					Androstenediol (3alpha, 17alpha) Monosulfate (2)
					Anthranilate
					Arabinose
					Arabitol/Xylitol
					Arachidate (20:0)
					Arachidonate (20:4n6)
					Arachidonoylcarnitine (C20:4)
					Arachidonoylcholine
					Arachidoylcarnitine (C20)
					Argininate
					Ascorbate (Vitamin C)
					Aspartate
					Aspartic Acid
					Azelate (Nonanedioate)
					Behenate (22:0)
					Beta-Alanine
					Beta-Citrylglutamate
					Beta-Hydroxybutyric Acid
					Bilirubin
					Bilirubin (E,Z Or Z,E)
					Bradykinin, Des-Arg(9)
					Butyric.Acid
					Butyrylcarnitine (C4:0)
					C0
					C10.2
					C10:1
					C10:2
					C12.1
					C12-DC
					C14
					C14.1
					C14.2
					C14:1
					C14:1-OH
					C14:2-OH
					C16.1
					C16.2
					C16:1=OH
					C16:2-OH
					C16-OH
					C18.1
					C18.2
					C18:2
					C3:1
					C3-DC (C4-OH)
					C4.1
					C4OH
					C5-DC (C6-OH)
					C5-OH (C3-DC-M)
					C6
					C7-DC
					Caffeine
					Caprate (10:0)
					Caprylate (8:0)
					Catechol Sulfate
					Ceramide (D18:1/14:0, D16:1/16:0)
					Ceramide (D18:1/17:0, D17:1/18:0)
					Ceramide (D18:1/20:0, D16:1/22:0, D20:1/18:0)
					Cerotoylcarnitine (C26)
					Chenodeoxycholate
					Chiro-Inositol
					Cholate
					Cholesterol
					Choline (Lipid)
					Choline Lipid
					Choline Phosphate
					Cis-4-Decenoyl Carnitine
					Cis-4-Decenoylcarnitine (C10:1)
					Cis-Aconitic Acid
					Citraconate/Glutaconate
					Cystathionine
					Cysteic Acid
					Cysteine Sulfinic Acid
					Cytidine
					Cytosine
					DAG 34:1
					DAG 36:1
					DAG 36:3
					Decanoylcarnitine (C10)
					Decanoylcarnitine (C10:0)
					Deoxycarnitine
					Deoxycholate
					D-Glucuronic Acid
					Diacylglycerol (14:0/18:1, 16:0/16:1) [2]
					Diacylglycerol (16:1/18:2 [2], 16:0/18:3 [1])
					Dihomo-Linolenoylcarnitine (20:3n3 Or 6)
					Dihomo-Linolenoyl-Choline
					Dihomo-Linoleoylcarnitine (C20:2)
					Dihydroferulic Acid
					Dihydroorotate
					Dimethylglycine
					DMA
					Docosahexaenoate (DHA; 22:6n3)
					Docosahexaenoylcarnitine (C22:6)
					Docosahexaenoylcholine
					Docosapentaenoate (N3 DPA; 22:5n3)
					Docosapentaenoylcarnitine (C22:5n3)
					Docosatrienoate (22:3n3)
					Docosatrienoate (22:3n6)
					Dodecanedioate
					Dodecanoylcarnitine (C12:0)
					Dopamine 3-O-Sulfate
					Dopamine Sulfate (1)
					Dopamine Sulfate (2)
					DSGEGDFXAEGGGVR
					Dump
					Ectoine
					Eicosanodioate
					Eicosapentaenoate (EPA; 20:5n3)
					Eicosapentaenoylcholine
					Eicosenoate (20:1)
					Eicosenoylcarnitine (C20:1)
					Erucate (22:1n9)
					Erythronate
					Ethyl Glucuronide
					Ethylmalonate
					Eugenol Sulfate
					Formate
					Fumarate
					Galactonate
					Gamma-CEHC
					Gamma-Glutamyl-Alpha-Lysine
					Gamma-Glutamyl-Epsilon-Lysine
					Gamma-Glutamylglutamate
					Gamma-Glutamylhistidine
					Gamma-Glutamylmethionine
					Gamma-Glutamyltryptophan
					Gamma-Glutamyltyrosine
					Gentisate
					Gluconate
					Glucose 6-Phosphate
					Glucuronate
					Glutarate (Pentanedioate)
					Glycerate
					Glycerol 2-Phosphate
					Glycerophosphoglycerol
					Glyceryl Lipids
					Glyceryl(Lipids)
					Glycochenodeoxycholate
					Glycochenodeoxycholate Sulfate
					Glycocholate
					Glycodeoxycholate
					Glycodeoxycholate Sulfate
					Glycohyocholate
					Glycolithocholate
					Glycolithocholate Sulfate
					Glycosyl-N-(2-Hydroxynervonoyl)-Sphingosine (D18:1/24:1(2OH))
					Glycoursodeoxycholate
					Glycyl-Glycine
					GPC
					Guanine
					HDL
					Hexadecanedioate
					Hexanoylcarnitine (C6:0)
					Hexanoylglutamine
					Hexose
					Hippuric Acid
					His
					Homocitrulline
					HWESASXX
					Hydroquinone Sulfate
					Imidazole Lactate
					Imidazole Propionate
					Imidazoleacetic Acid
					Indole-3-Carboxylic Acid
					Indoleacetate
					Indole-Acetic Acid
					Indolelactate
					Indolin-2-One
					Inosinic Acid
					Isobutyrylcarnitine (C4)
					Isocitric Acid
					Isovalerylcarnitine (C5)
					Lactic Acid
					Lanthionine
					L-Arginine
					L-Asparagine
					Laurate (12:0)
					Laurylcarnitine
					Laurylcarnitine (C12)
					LDL
					L-Homoserine
					Lidocaine
					Linoleate (18:2n6)
					Linoleoyl-Arachidonoyl-Glycerol (18:2/20:4) [1]
					Linoleoylcarnitine (C18:2)
					Linoleoylcholine
					Linoleoyl-Docosahexaenoyl-Glycerol (18:2/22:6) [1]
					Lipid
					L-Isoleucine
					L-Lysine
					L-Methionine
					L-Proline
					L-Threonine
					L-Tryptophan
					L-Tyrosine
					L-Urobilin
					L-Valine
					LYSOC14:0
					LYSOC16.0
					LYSOC17:0
					LYSOC18.1
					LYSOC18.2
					LYSOC18:0
					LYSOC20.3
					LYSOC20.4
					LYSOC24:0
					Lysopc (18:2)
					Lysopc 16:0
					Lysopc 16:1
					Lysopc A C24:0
					Lysopc A C26:1
					Lysopc A C28:0
					Lysopc(18:0)
					Lysopc(18:2(9Z,12Z))
					Lysopc(18:2)
					Lysopc(18:3)
					Lysopc(18:4)
					Lysopc(20:1) Or PC (18:1/2:0)
					Lysopc(20:3)
					Lysopc(20:5)
					Lysope (18:1)
					Lysope (18:1) (A)
					Lysope (18:1) (B)
					Lysope(16:0)
					Lysope(18:1)
					Lysope(18:2)
					Lysope(18:3)
					Lysope(20:4)
					Malate
					Maleate
					Malonate
					Maltose
					Mannitol/Sorbitol
					Margarate (17:0)
					Margaroylcarnitine
					Mead Acid (20:3n9)
					Methionine.Sulfoxide
					Methionine-Sulfoxide
					Methyl Glucopyranoside (Alpha + Beta)
					Methylhistidine
					Methylmalonate (MMA)
					Methylmalonic Acid
					Methylmalonic.Acid
					Methylphosphate
					Methylsuccinate
					Myo-Inositol
					Myristate (14:0)
					Myristoleoylcarnitine (C14:1)
					Myristoylcarnitine (C14)
					Myristoylcholine
					N-(2-Furoyl)Glycine
					N1-Methyl-2-Pyridone-5-Carboxamide
					N1-Methyl-4-Pyridone-3-Carboxamide
					N1-Methyladenosine
					N1-Methylinosine
					N2,N2-Dimethylguanosine
					N6-Acetyllysine
					N-Acetyl Proteins/Metabolites
					N-Acetyl-1-Methylhistidine
					N-Acetyl-3-Methylhistidine
					N-Acetylalliin
					N-Acetylasparagine
					N-Acetylaspartate (NAA)
					N-Acetyl-Aspartyl-Glutamate (NAAG)
					N-Acetyl-Beta-Alanine
					N-Acetylglutamine
					N-Acetylleucine
					N-Acetylmethionine
					N-Acetylneuraminate
					N-Acetylphenylalanine
					N-Acetylproline
					N-Acetyltryptophan
					N-Behenoyl-Sphingadienine (D18:2/22:0)
					N-Delta-Acetylornithine
					Nervonate (24:1n9)
					Nervonoylcarnitine (C24:1)
					N-Ethylglycinexylidide
					N-Formylanthranilic Acid
					N-Formylmethionine
					Nicotinamide
					N-Methylalanine
					N-Methylproline
					N-Palmitoyl-Heptadecasphingosine (D17:1/16:0)
					N-Palmitoyl-Sphingadienine (D18:2/16:0)
					N-Palmitoyl-Sphingosine (D18:1/16:0)
					N-Stearoyl-Sphingadienine (D18:2/18:0)
					N-Stearoyl-Sphinganine (D18:0/18:0)
					N-Stearoyl-Sphingosine (D18:1/18:0)
					N-Trimethyl 5-Aminovalerate
					Octadecanedioate
					Octanoylcarnitine
					Octanoylcarnitine (C8)
					Octanoylcarnitine (C8:0)
					Octenoylcarnitine (C8:1)

## Sheet: TS2 Blood-Plasma Study Data
Metabolite lists showing significantly rhythmic/gradient metabolites by publication and, if applicable, studied conditions. Lists are shown in chronological order (left to right) and organised in tabs based on biofluid.	Author(s) / Year	Park et al (2009)	Dallmann et al (2012)	Ang et al (2012)	Kasukawa et al (2012)	Chua et al (2013)	Kim et al (2014)	Davies et al (2014)		Chua (2015)		Skarke (2017)	Isherwood (2017)			Gehrman et al (2018)			Sato et al (2018)				Skene et al (2018)		Grant et al (2018)		Kervezee et al (2018)		Gu et al (2019)					Honma et al (2020)			Lusczek (2020 – Taken from pre-print, awaiting review)
	Study type	Diurnal Timecourse ³24h	Circadian	Diurnal time course >24 h	Circadian	Circadian	Diurnal Timecourse <24h	Diurnal time course ³24 h		Circadian		Diurnal Timecourse >24h	Diurnal time course >24 h			Diurnal time course >24 h			Diurnal time course <24 h				Circadian/ shiftwork simulation		Circadian		Diurnal time course ³24 h		Diurnal time course >24 h					Diurnal time course >24 h			Diurnal time course ³24 h
	Bio fluid	Plasma	Plasma	Plasma	Plasma	Plasma	Plasma	Plasma	Plasma	Plasma		Plasma	Plasma			Serum			Serum				Plasma		Plasma		Plasma		Plasma					Plasma			Plasma
	Additional conditions (if applicable)									Decreased during sleep deprivation	Increased during sleep deprivation		Lean	OW/OB	T2DM	Healthy	Insomniac	Combined	Significantly 'gradient' serum metabolites before HFD	Significantly 'gradient' serum metabolites after HFD	Significantly 'gradient' serum metabolites before HCD	Significantly 'gradient' serum metabolites after HCD	Rhythmic Following Day Shift Condition	Rhythmic Following night Shift Condition	Rhythmic, Rhythmic & Linear	Linear change during prolonged wakefulness	Rhythmic at baseline	Rythmic during night shift	meets bonferoni threshold in at least 1 of 3 participants	meets bonferoni threshold in at least 2 of 3 participants	meets bonferoni threshold in all 3 participants	P < 0.01 for all particpants but only meets bonferoni threshold in 1 of 3 participants	P < 0.01 for all particpants but only meets bonferoni threshold in 2 of 3 participants	Rhythmic During 8:16H Sleep/wake cycle (Day 1)	Rhythmic During sleep deprivation (Day 2)	Rhythmic During 8:16H recovery Sleep/wake cycle (Day 3)	Healthy Participant Group	ICU Participant group
	Formatting description							Total rhythmic N=124, clear (N=78) rhythmic on day 1 + 2 orange (N=31) day 1 only, blue (N=15) day 2 only)	Higher during Sleep deprivation (light grey - also rhythmic on at least one day)				Light blue common to all, light orange common to non diabetic groups (Lean OW/OB), light grey common to overweight groups (OW/OB & T2DM), colourless unique to group						Serum (Light blue - common to both before/after HFD)		Serum (Light orange - common to both before/after HFD)		(Light blue - common to both conditions, Bold Sig. diff amplitude between conditions)				Common metabolites across groups highlighted in orange		Common metabolites across groups highlighted in orange					Unique metabolites across groups highlighted in blue
	Significant rhythmic/diurnally variable Metabolites	1-Methyl-His	10-heptadecenoate (17:1n7)	Octenoylcarnitine (C8:1)	Cortisone	Triacylglycerols	LysoPC(16:0)	Glutamate	lysoPC a C14:0	PC 34:1p	LysoPC 16:1	cortisol	citrulline	citrulline	citrulline	2-Hydroxybutyrate	Acetate	3-Hydroxybutyrate	(N(1) + N(8))-acetylspermidine	(N(1) + N(8))-acetylspermidine	1,2-dipalmitoyl-GPE (16:0/16:0)*	1,2-dipalmitoyl-GPE (16:0/16:0)*	Arginine	Arginine	2-Methylcitric acid	cis-Aconitic acid	Acetyl.Ornithine	Acetyl.Ornithine	1,2-dilinoleoyl-GPC (18:2/18:2)	4-guanidinobutanoate	1-oleoyl-2-linoleoyl-GPE (18:1/18:2)*	1,2-dilinoleoyl-GPC (18:2/18:2)	1,2-dilinoleoyl-GPE (18:2/18:2)*	lysoPC a C26:0	PC aa C32:3	Carnitine	Cortisone
		3-Methyl-His	13-HODE + 9-HODE	Acetylcarnitine (C2:0)	Urocortisone-3-glucronide	TAG 48:3	LysoPC(18:2(9Z,12Z))	Isoleucine	lysoPC a C17:0	PC 34:2p	TAG 48:3	imidazoleacetic acid	AC-C2	AC-C2	AC-C2	Citrate	Creatine	3-Hydroxyisobutyrate	1,2-dilinoleoyl-GPC (18:2/18:2)	1,2-dilinoleoyl-GPC (18:2/18:2)	12,13-DiHOME	12,13-DiHOME	C18:1	C18:1	Citrulline	L-Proline	Alanine	Alanine	1,2-dilinoleoyl-GPE (18:2/18:2)*	hydantoin-5-propionic acid		1,2-dilinoleoyl-GPE (18:2/18:2)*	1-linoleoyl-GPC (18:2)	lysoPC a C28:1	PC aa C38:6	PC ae C30:2	2-Hydroxylauroylcarnitine
		3-OH-butyrate	1-eicosadienoylglycerophosphocholine	Oleoylcarnitine (C18:1)	Pregnanolone sulfate-like metabolite	TAG 48:2	LysoPC(18:0)	Ornithine	PC aa C28:1	PC 36:2p	TAG 56:3	propionylcarnitine	SDMA	SDMA	SDMA	Glycerol	Glutamine	3-methyl-2-oxovalerate	1,2-dipalmitoyl-GPE (16:0/16:0)*	1,2-dipalmitoyl-GPE (16:0/16:0)*	17alpha-hydroxypregnenolone 3-sulfate	17alpha-hydroxypregnenolone 3-sulfate	Isoleucine	Isoleucine	Fumaric acid	Uridine	Arginine	Arginine	17alpha-hydroxypregnenolone sulfate	dopamine sulfate (1)		17alpha-hydroxypregnenolone sulfate	1-oleoyl-2-linoleoyl-GPE (18:1/18:2)*	PC aa C34:3	PC ae C44:4	PC ae C38:2	Aminoadipate
		Acetoacetate	1-oleoylglycerol (1-monoolein)	Hexanoylcarnitine (C6:0)	(allo)Urocortisol-3-glucronide	TAG 48:1	PI(18:0/18:2(9Z,12Z))	Proline	PC aa C30:0	TAG 50:1	SM 18:1/24:1	Myo-inositol	AC-C16	AC-C16	AC-C16	Propyelene Glycol	Phenyalanine	Acetone	12,13-DiHOME	12,13-DiHOME	1-linoleoyl-GPE (18:2)*	1-linoleoyl-GPE (18:2)*	LysoPC a C18:1	LysoPC a C18:1	L-Arginine	Phosphoric acid	Asparagine	Asparagine	1-linolenoyl-GPC (18:3)*	dopamine sulfate (2)		1-linolenoyl-GPC (18:3)*	1-oleoyl-GPE (18:1)	PC aa C36:0	SM (OH) C24:1	SM C26:1	Acetylcarnitine
		Alanine	1-palmitoylglycerophosphoinositol	Tetradenenoylcarnitine (C14:1)	L-phenylalanine	TAG 48:0	LysoPC(16:0)	Valine	PC aa C32:0		PC 34:2	5,5-Dimethyl-1-pyrroline N-oxide	PC aa C32:1	PC aa C32:1	PC aa C32:1	Sebacate	GPC	Isoleucine	13-HODE + 9-HODE	13-HODE + 9-HODE	1-methylimidazoleacetate	1-methylimidazoleacetate	LysoPC a C18:2	LysoPC a C18:2	L-Leucine		beta.Hydroxybutyric.acid	beta.Hydroxybutyric.acid	1-linoleoyl-2-linolenoyl-GPC (18:2/18:3)*	acisoga		1-linoleoyl-GPC (18:2)	1-stearoyl-2-linoleoyl-GPE (18:0/18:2)*	PC aa C36:6	Taurine	Threonine	Proline
		Aspartic acid	21-hydroxypregnenolone disulfate	Tetradecadienoylcarnitine (C14:2)	Tryptophan	TAG 50:4		Alpha-AAA	PC aa C32:1		DAG 36:2	4-guanidinobutanoic Acid, ?	PC aa C36:5	PC aa C36:5	PC aa C36:5	Glucose	Lysine	Lactate	13-methylmyristate	13-methylmyristate	1-methylnicotinamide	1-methylnicotinamide	LysoPC a C26:0	LysoPC a C26:0	L-Lysine		C10	C10	1-linoleoyl-GPC (18:2)	pro-hydroxy-pro		1-linoleoyl-GPE (18:2)*	1-stearoyl-2-oleoyl-GPE (18:0/18:1)	PC aa C40:2	alpha-AAA	Tryptophan	Tyramine
		Cholesterol	2-linoleoylglycerophosphoethanolamine	Palmitoylcarnitine (C16:0)	L-leucine	TAG 50:3		SDMA	PC ae C32:1		PC 38:3	Acetylhlycine, Guanidineacetate, 1-(2-hydroxyethyl)-1-methylguanidine	AC-C3	AC-C3	AC-C3		N-Acetyl proteins/metabolites	Mannose	15-methylpalmitate	15-methylpalmitate	2-aminoadipate	2-aminoadipate	Ornithine	Ornithine	L-Methionine		C10.2	C10.2	1-linoleoyl-GPE (18:2)*	arabonate/xylonate		1-linoleoyl-GPG (18:2)*	acisoga	PC ae C42:1	Asparagine	Asparagine	LysoPC (18:2)
		Choline (lipid)	2-oleoylglycerophosphoethanolamine	Stearoylcarnitine (C18:0)		TAG 50:2		Kynurenine	PC ae C36:0		TAG 48:2		proline	proline	proline			Proline	1-arachidonoyl-GPE (20:4n6)*	1-arachidonoyl-GPE (20:4n6)*	2-aminophenol sulfate	2-aminophenol sulfate	PC aa C30:0	PC aa C30:0	L-Threonine		C14.2	C14.2	1-linoleoyl-GPG (18:2)*	bilirubin (Z,Z)		1-oleoyl-2-linoleoyl-GPE (18:1/18:2)*	arabitol/xylitol	PC ae C42:3	Glutamate	Glutamate	LysoPE (18:1)
		Choline lipid	3-hydroxydecanoate	Tetradecanoylcarnitine (C14:0)		TAG 51:2		Sarcosine	PC ae C36:2		TAG 54:3		sarcosine	sarcosine	sarcosine			Tyrosine	1-linoleoyl-2-arachidonoyl-GPC (18:2/20:4n6)*	1-linoleoyl-2-arachidonoyl-GPC (18:2/20:4n6)*	2-hydroxybutyrate/2-hydroxyisobutyrate	2-hydroxybutyrate/2-hydroxyisobutyrate	PC aa C32:0	PC aa C32:0	L-Valine		C16.1	C16.1	1-oleoyl-2-linoleoyl-GPE (18:1/18:2)*	oleoyl-linoleoyl-glycerol (18:1/18:2) [1]		1-oleoyl-GPE (18:1)	bilirubin (Z,Z)	alpha-AAA	lysoPC a C16:0	Glycine	LysoPE (18:1) (a)
		Citrate	5alpha-androstan-3alpha,17beta-diol disulfate	Dodecanoylcarnitine (C12:0)		TAG 52:6		C0	PC ae C38:2		TAG 54:4		AC-C4	AC-C4	AC-C4			Valine	1-linoleoyl-2-linolenoyl-GPC (18:2/18:3)*	1-linoleoyl-2-linolenoyl-GPC (18:2/18:3)*	2-hydroxyglutarate	2-hydroxyglutarate	PC aa C32:1	PC aa C32:1	Sucrose-6-phosphate		C2	C2	1-oleoyl-GPE (18:1)	2-hydroxyoctanoate		1-palmitoyl-2-oleoyl-GPE (16:0/18:1)	cortisol	Asparagine	lysoPC a C16:1	Kynurenine	LysoPE (18:1) (b)
		Citrulline	arachidonate (20:4n6)	Bilirubin		TAG 52:5		C3:1	PC ae C38:3		TAG 52:5		lysoPC a C18:2	lysoPC a C18:2	lysoPC a C18:2			Tryptophan	1-linoleoyl-GPE (18:2)*	1-linoleoyl-GPE (18:2)*	2-isopropylmalate	2-isopropylmalate	PC aa C32:3	PC aa C32:3	4-Hydroxyphenylpyruvic acid		C5	C5	1-palmitoyl-2-linoleoyl-GPE (16:0/18:2)	1-linoleoyl-GPC (18:2)		1-stearoyl-2-linoleoyl-GPE (18:0/18:2)*	cortisone	Glutamate	lysoPC a C17:0	lysoPC a C16:0
		Creatinine	cis-4-decenoyl carnitine	Octanoylcarnitine (C8:0)		TAG 52:4		C4	PC ae C38:4		TAG 50:4		lysoPC a C20:3	lysoPC a C20:3	lysoPC a C20:3				1-methylnicotinamide	1-methylnicotinamide	2-keto-3-deoxy-gluconate	2-keto-3-deoxy-gluconate	PC aa C34:4	PC aa C34:4	Citric acid		C6	C6	1-palmitoyl-2-oleoyl-GPE (16:0/18:1)	1-oleoyl-GPE (18:1)		1-stearoyl-2-oleoyl-GPE (18:0/18:1)	dopamine sulfate (2)	Glycine	lysoPC a C18:0	lysoPC a C16:1
		Formate	cortisol	Decanoylcarnitine (C10:0)		TAG 52:3		C14	PC ae C40:2		TAG 54:7		lysoPC a C20:4	lysoPC a C20:4	lysoPC a C20:4				1-myristoyl-2-palmitoyl-GPC (14:0/16:0)	1-myristoyl-2-palmitoyl-GPC (14:0/16:0)	2-methylbutyrylcarnitine (C5)	2-methylbutyrylcarnitine (C5)	PC aa C36:0	PC aa C36:0	D-Glucuronic acid		C8	C8	1-stearoyl-2-linoleoyl-GPE (18:0/18:2)*	1-oleoyl-2-linoleoyl-GPE (18:1/18:2)*		1-stearoyl-2-oleoyl-GPI (18:0/18:1)*	gamma-glutamylisoleucine*	Kynurenine	lysoPC a C18:1	lysoPC a C17:0
		Glutamine	cortisone	Cortisol		TAG 52:2		C14:2	PC ae C40:3		PC 36:3		lysoPC a C18:1	lysoPC a C18:1	lysoPC a C18:1				1-myristoylglycerol (14:0)	1-myristoylglycerol (14:0)	2-oxoarginine*	2-oxoarginine*	PC aa C36:5	PC aa C36:5	L-Homoserine		Citrulline	Citrulline	1-stearoyl-2-oleoyl-GPE (18:0/18:1)	1,2-dilinoleoyl-GPE (18:2/18:2)*		2,3-dihydroxyisovalerate	hydantoin-5-propionic acid	lysoPC a C16:0	lysoPC a C18:2	lysoPC a C18:0
		Glutamic acid	dihomo-linoleate (20:2n6)	Cortisone		TAG 52:1		C16	PC ae C40:5		PC 40:7		glycine	glycine	AC-C14:1				1-oleoyl-2-linoleoyl-GPE (18:1/18:2)*	1-oleoyl-2-linoleoyl-GPE (18:1/18:2)*	3-hydroxy-3-methylglutarate	3-hydroxy-3-methylglutarate	PC aa C36:6	PC aa C36:6	L-Asparagine		Glucose	Glucose	1-stearoyl-2-oleoyl-GPI (18:0/18:1)*	1-linoleoyl-2-linolenoyl-GPC (18:2/18:3)*		4-androsten-3alpha,17alpha-diol monosulfate (2)	N-palmitoyl-sphinganine (d18:0/16:0)	lysoPC a C16:1	lysoPC a C20:3	lysoPC a C18:1
		Glycine	dihomo-linolenate (20:3n3 or n6)	LysoPC(18:4)		TAG 52:0		C16-OH	PC ae C40:6		PI 36:3		AC-C18:1	AC-C18:1	AC-C18				1-oleoyl-GPE (18:1)	1-oleoyl-GPE (18:1)	3-hydroxyisobutyrate	3-hydroxyisobutyrate	PC aa C40:2	PC aa C40:2	L-Isoleucine		Hippuric.acid	Hippuric.acid	2,3-dihydroxyisovalerate	1-palmitoyl-2-linoleoyl-GPE (16:0/18:2)		6-oxopiperidine-2-carboxylate	oleoyl-linoleoyl-glycerol (18:1/18:2) [1]	lysoPC a C17:0	lysoPC a C20:4	lysoPC a C18:2
		Glyceryl lipids	docosadienoate (22:2n6)	Propionylcarnitine (C3:0)		TAG 53:3		C16:1=OH	SM (OH) C14:1		TAG 52:6		alanine	alanine	PC aa C36:2				1-palmitoyl-2-linoleoyl-GPE (16:0/18:2)	1-palmitoyl-2-linoleoyl-GPE (16:0/18:2)	3-hydroxylaurate	3-hydroxylaurate	PC aa C42:2	PC aa C42:2	L-Tyrosine		Indole.acetic.acid	Indole.acetic.acid	2-hydroxyoctanoate	1-stearoyl-2-linoleoyl-GPE (18:0/18:2)*		acisoga	prolylglycine	lysoPC a C18:0	PC aa C28:1	lysoPC a C20:3
		Glyceryl(lipids)	docosahexaenoate (DHA; 22:6n3)	Methionine		TAG 53:2		C16:2-OH	SM (OH) C16:1		TAG 54:6		tyrosine	tyrosine	lysoPC a C16:0				1-palmitoyl-2-linoleoyl-GPI (16:0/18:2)	1-palmitoyl-2-linoleoyl-GPI (16:0/18:2)	3-hydroxypyridine sulfate	3-hydroxypyridine sulfate	PC ae C30:0	PC ae C30:0	Ornithine		Isoleucine	Isoleucine	4-androsten-3alpha,17alpha-diol monosulfate (2)	1-stearoyl-2-oleoyl-GPE (18:0/18:1)		arabitol/xylitol		lysoPC a C18:1	PC aa C30:0	lysoPC a C20:4
		HDL	docosapentaenoate (n3 DPA; 22:5n3)	Tyrosine		TAG 54:6		C18:1	SM (OH) C22:2		TAG 54:5		alpha-AAA	alpha-AAA	lysoPC a C18:0				1-palmitoyl-2-oleoyl-GPE (16:0/18:1)	1-palmitoyl-2-oleoyl-GPE (16:0/18:1)	3-methyl catechol sulfate (1)	3-methyl catechol sulfate (1)	PC ae C34:0	PC ae C34:0	dUMP		Lactic.acid	Lactic.acid	4-guanidinobutanoate	N-palmitoyl-sphinganine (d18:0/16:0)		bilirubin (Z,Z)		lysoPC a C18:2	PC aa C32:1	PC aa C28:1
		Histidine	docosapentaenoate (n6 DPA; 22:5n6)	LysoPE(16:0)		TAG 54:5		C18:2	SM C20:2		PC 32:2		PC ae C36:2	PC ae C36:2	taurine				1-stearoyl-2-linoleoyl-GPE (18:0/18:2)*	1-stearoyl-2-linoleoyl-GPE (18:0/18:2)*	3-methyl-2-oxovalerate	3-methyl-2-oxovalerate	PC ae C34:3	PC ae C34:3	Glycyl-glycine		Leucine	Leucine	6-oxopiperidine-2-carboxylate	cortisol		biliverdin		lysoPC a C20:3	PC aa C36:1	PC aa C30:0
		Isoleucine	eicosapentaenoate (EPA; 20:5n3)	Proline		TAG 54:4		lysoPC a C16:0	Taurine		PC 34:3		isoleucine	isoleucine					2-aminophenol sulfate	2-aminophenol sulfate	4-acetylphenol sulfate	4-acetylphenol sulfate	Proline	Proline	5-Hydroxylysine		LYSOC14.0	LYSOC14.0	acisoga	cortisone		cortisol		lysoPC a C20:4	PC aa C36:5	PC aa C32:1
		Lactate	glycerol	LysoPE(18:3)		TAG 54:3		lysoPC a C17:0	lysoPC a C16:1				PC aa C36:1	PC aa C36:1					2-hydroxybutyrate/2-hydroxyisobutyrate	2-hydroxybutyrate/2-hydroxyisobutyrate	4-guanidinobutanoate	4-guanidinobutanoate	Sarcosine	Sarcosine	Inosinic acid		LYSOC18.2	LYSOC18.2	arabitol/xylitol	xanthine		cortisone		PC aa C28:1	PC aa C38:0	PC aa C34:4
		LDL	laurylcarnitine	Butyrylcarnitine (C4:0)		TAG 54:2		lysoPC a C18:0	PC aa C36:6				PC aa C36:3	PC aa C36:3					2-isopropylmalate	2-isopropylmalate	4-hydroxyhippurate	4-hydroxyhippurate	Serotonin	Serotonin	Glucose 6-phosphate		Methionine.Sulfoxide	Methionine.Sulfoxide	arabonate/xylonate	prolylglycine		dopamine sulfate (2)		PC aa C30:0	PC aa C38:3	PC aa C36:1
		Leucine	linoleate (18:2n6)	LysoPE(20:4)		TAG 54:1		lysoPC a C18:2	Decanoylcarnitine (C10 )				valine	valine					3-hydroxy-3-methylglutarate	3-hydroxy-3-methylglutarate	4-hydroxyphenylpyruvate	4-hydroxyphenylpyruvate	SM C18:0	SM C18:0	Isocitric acid		Methylhistidine	Methylhistidine	bilirubin (Z,Z)	gamma-glutamylisoleucine*		etiocholanolone glucuronide		PC aa C32:1	PC aa C38:4	PC aa C36:5
		Lipid	linolenate [alpha or gamma; (18:3n3 or 6)]	LysoPE(18:2)		TAG 56:3		PC aa C30:0	Dodecanoylcarnitine (C12)				PC aa C40:2	PC aa C40:2					3-hydroxyhexanoate	3-hydroxyhexanoate	4-imidazoleacetate	4-imidazoleacetate	SM C18:1	SM C18:1	L-Phenylalanine		Methylmalonic.acid	Methylmalonic.acid	biliverdin	2,3-dihydroxyisovalerate		gamma-glutamylisoleucine*		PC aa C34:4	PC aa C38:5	PC aa C38:0
		Lysine	nonadecanoate (19:0)	LysoPE(18:1)		TAG 60:0		PC aa C36:4	Hydroxyhexadecanoylcarnitine				kynurenine	AC-C14:1					3-hydroxyisobutyrate	3-hydroxyisobutyrate	9,10-DiHOME	9,10-DiHOME	SM C20:2	SM C20:2	L-Tryptophan		Ornithine	Ornithine	cortisol	pyrraline		gamma-glutamylleucine		PC aa C36:1	PC aa C40:3	PC aa C38:3
		Phenylalanine	octanoylcarnitine	Lysine		DAG 34:1		PC aa C38:0	lysoPC a C18:1				PC aa C34:4	AC-C18					3-hydroxyoctanoate	3-hydroxyoctanoate	acetoacetate	acetoacetate	Taurine	Taurine	Pantothenic acid		Phenylalanine	Phenylalanine	cortisone			gamma-glutamylphenylalanine		PC aa C36:5	PC aa C40:4	PC aa C38:4
		Proline	palmitate (16:0)	Phenylalanine		DAG 36:3		PC aa C38:3	Nonaylcarnitine (C9)				PC ae C34:1	PC aa C36:2					3-hydroxypyridine sulfate	3-hydroxypyridine sulfate	aconitate [cis or trans]	aconitate [cis or trans]	Alanine	C14:2	Cysteic acid		Proline	Proline	dopamine sulfate (1)			gamma-glutamylvaline		PC aa C38:0	PC aa C40:5	PC aa C38:5
		Trptophan	palmitoleate (16:1n7)	LysoPC(18:2)		DAG 36:2		PC aa C38:4	Octanoylcarnitine (C8)				PC aa C36:6	lysoPC a C16:0					4-hydroxyphenylpyruvate	4-hydroxyphenylpyruvate	adenosine	adenosine	Glutamine	C2			Pyruvic.acid	Pyruvic.acid	dopamine sulfate (2)			hydantoin-5-propionic acid		PC aa C38:3	PC aa C40:6	PC aa C40:3
		Tyrosine	pregn steroid monosulfate	LysoPC(20:5)		DAG 36:1		PC aa C38:5	PC aa C32:3				PC ae C30:0	lysoPC a C18:0					5-hydroxylysine	5-hydroxylysine	adipate	adipate	Histidine	C3-DC (C4-OH)			TMAO	TMAO	etiocholanolone glucuronide			isoleucine		PC aa C38:4	PC aa C42:0	PC aa C40:4
		Unsat lipid	pregnen-diol disulfate	LysoPC(20:3)		PC 32:2		PC aa C38:6	PC aa C34:4				PC aa C36:0	lysoPC a C26:0					9,10-DiHOME	9,10-DiHOME	alpha-ketobutyrate	alpha-ketobutyrate	Kynurenine	C5-DC (C6-OH)			Tryptophan	Tryptophan	gamma-glutamylisoleucine*			N6,N6,N6-trimethyllysine		PC aa C38:5	PC aa C42:2	PC aa C40:5
		Unsat. lipid	pregnenolone sulfate	LysoPC(18:3)		PC 34:2p		PC aa C40:1	PC ae C30:0				SM C20:2	ornithine					aconitate [cis or trans]	aconitate [cis or trans]	alpha-ketoglutarate	alpha-ketoglutarate	Leucine	C9			Tyrosine	Tyrosine	gamma-glutamylleucine			N-acetylcitrulline		PC aa C40:3	PC aa C42:5	PC aa C40:6
		Valine	4-hydroxyphenylpyruvate	Leucine		PC 34:1p		PC aa C40:2	PC ae C34:0				PC ae C34:0	AC-C0					adipate	adipate	androstenediol (3alpha, 17alpha) monosulfate (2)	androstenediol (3alpha, 17alpha) monosulfate (2)	Lysine	Citrulline			alpha.Aminoadipic.acid	alpha.Ketoglutaric.acid	gamma-glutamylphenylalanine			N-palmitoyl-sphinganine (d18:0/16:0)		PC aa C40:4	PC aa C42:6	PC aa C42:0
		VLDL	alpha-hydroxyisocaproate	LysoPC(20:1) or PC (18:1/2:0)		PC 34:0p		PC aa C40:3	PC ae C34:1				AC-C5	PC aa C36:4					alpha-ketobutyrate	alpha-ketobutyrate	anthranilate	anthranilate	LysoPC a C16:1	Glutamic acid			C4.1	Betaine	gamma-glutamylvaline			oleoyl-linoleoyl-glycerol (18:1/18:2) [1]		PC aa C40:5	PC ae C30:0	PC aa C42:1
			glutamate			PC 36:2p		PC aa C40:4	PC ae C36:1				PC aa C42:2	PC ae C44:3					alpha-ketoglutarate	alpha-ketoglutarate	arachidonoylcholine	arachidonoylcholine	LysoPC a C17:0	PC aa C34:1			Citric.acid	Butyric.acid	hydantoin-5-propionic acid			phenylalanine		PC aa C40:6	PC ae C32:1	PC aa C42:4
			fructose			LysoPC 16:0		PC aa C40:5	Pimelylcarnitine (C7SDC)					PC ae C40:1					androstenediol (3alpha, 17alpha) monosulfate (2)	androstenediol (3alpha, 17alpha) monosulfate (2)	arginine	arginine	LysoPC a C18:0	PC aa C34:2			Creatine	C12	isoleucine			pregn steroid monosulfate*		PC aa C42:0	PC ae C32:2	PC aa C42:5
			lactate					PC aa C40:6	Propionylcarnitine (C3)					lysoPC a C16:1					arabonate/xylonate	arabonate/xylonate	ascorbate (Vitamin C)	ascorbate (Vitamin C)	LysoPC a C20:3	PC aa C34:3			LYSOC16.0	C12.1	N6,N6,N6-trimethyllysine			pregnenolone sulfate		PC aa C42:1	PC ae C34:0	PC aa C42:6
			glycerol 2-phosphate					PC aa C42:0	Serotonin					lysoPC a C17:0					arachidonoylcholine	arachidonoylcholine	asparagine	asparagine	LysoPC a C20:4	PC aa C36:2			LYSOC17.0	C14.1	N-acetylcitrulline			pro-hydroxy-pro		PC aa C42:2	PC ae C34:1	PC ae C30:0
			hippurate					PC aa C42:1	Tetradecanoylcarnitine (C14)					threonine					asparagine	asparagine	azelate (nonanedioate)	azelate (nonanedioate)	LysoPC a C26:1	PC aa C36:4			LYSOC18.0	C16	N-palmitoyl-sphinganine (d18:0/16:0)			prolylglycine		PC aa C42:4	PC ae C34:2	PC ae C32:1
			Heme					PC aa C42:2	Tryptophan										behenate (22:0)*	behenate (22:0)*	betaine	betaine	LysoPC a C28:0	PC aa C38:4			LYSOC18.1	C16.2	oleoyl-linoleoyl-glycerol (18:1/18:2) [1]			tyramine O-sulfate		PC aa C42:5	PC ae C34:3	PC ae C32:2
			pyridoxate					PC aa C42:4	Valerylcarnitine (C5)										beta-alanine	beta-alanine	caffeic acid sulfate	caffeic acid sulfate	PC aa C24:0	PC aa C40:5			LYSOC20.3	C18	phenylalanine					PC aa C42:6	PC ae C36:1	PC ae C34:0
								PC aa C42:5											caffeic acid sulfate	caffeic acid sulfate	caprate (10:0)	caprate (10:0)	PC ae C34:2	PC ae C34:1			LYSOC20.4	C18.1	pregn steroid monosulfate*					PC ae C32:1	PC ae C36:2	PC ae C34:1
								PC aa C42:6											caprate (10:0)	caprate (10:0)	caprylate (8:0)	caprylate (8:0)	PC ae C36:0	PC ae C36:4			Methionine	C18.2	pregnenolone sulfate					PC ae C32:2	PC ae C36:3	PC ae C34:2
								PC ae C32:2											caprylate (8:0)	caprylate (8:0)	ceramide (d18:1/14:0, d16:1/16:0)*	ceramide (d18:1/14:0, d16:1/16:0)*	PC ae C38:2	PC ae C36:5			PC38.6AA	C3	pro-hydroxy-pro					PC ae C34:1	PC ae C36:4	PC ae C34:3
								PC ae C34:2											ceramide (d18:1/14:0, d16:1/16:0)*	ceramide (d18:1/14:0, d16:1/16:0)*	choline phosphate	choline phosphate	Phenylalanine	PC ae C44:3			PC40.2AA	C4	prolylglycine					PC ae C34:2	PC ae C36:5	PC ae C36:0
								PC ae C34:3											ceramide (d18:1/17:0, d17:1/18:0)*	ceramide (d18:1/17:0, d17:1/18:0)*	cis-4-decenoylcarnitine (C10:1)	cis-4-decenoylcarnitine (C10:1)	Threonine	Tryptophan			PC40.6AE	C4OH	pyrraline					PC ae C34:3	PC ae C38:0	PC ae C36:1
								PC ae C36:3											choline phosphate	choline phosphate	citraconate/glutaconate	citraconate/glutaconate					Sarcosine	Glutamic.acid	tyramine O-sulfate					PC ae C36:0	PC ae C38:3	PC ae C36:2
								PC ae C36:4											citraconate/glutaconate	citraconate/glutaconate	cortisol	cortisol					Threonine	Glutamine	xanthine					PC ae C36:1	PC ae C38:4	PC ae C36:3
								PC ae C36:5											cortisol	cortisol	cortisone	cortisone					trans.OH.Proline	Glycine	17-methylstearate					PC ae C36:3	PC ae C38:5	PC ae C36:4
								PC ae C38:0											cortisone	cortisone	creatine	creatine					Valine	His	1-linoleoyl-2-arachidonoyl-GPC (18:2/20:4n6)*					PC ae C36:4	PC ae C38:6	PC ae C36:5
								PC ae C38:3											creatine	creatine	cystathionine	cystathionine					X14.1SMOH	PC32.2AA	1-oleoyl-2-linoleoyl-GPC (18:1/18:2)*					PC ae C36:5	PC ae C40:1	PC ae C38:0
								PC ae C38:4											cytosine	cytosine	cytosine	cytosine						Serine	1-oleoyl-2-linoleoyl-GPI (18:1/18:2)*					PC ae C38:0	PC ae C40:2	PC ae C38:3
								PC ae C38:5											dihomo-linolenoyl-choline	dihomo-linolenoyl-choline	decanoylcarnitine (C10)	decanoylcarnitine (C10)						Spermidine	1-palmitoleoyl-2-linolenoyl-GPC (16:1/18:3)*					PC ae C38:3	PC ae C40:3	PC ae C38:4
								PC ae C38:6											dimethylglycine	dimethylglycine	dihomo-linolenoyl-choline	dihomo-linolenoyl-choline							1-palmitoleoyl-2-linoleoyl-GPC (16:1/18:2)*					PC ae C38:4	PC ae C40:4	PC ae C38:5
								PC ae C40:1											docosahexaenoylcholine	docosahexaenoylcholine	dihydroferulic acid	dihydroferulic acid							1-palmitoyl-2-arachidonoyl-GPE (16:0/20:4)*					PC ae C38:5	PC ae C40:5	PC ae C38:6
								PC ae C40:3											dodecanedioate	dodecanedioate	dimethylglycine	dimethylglycine							1-palmitoylglycerol (16:0)					PC ae C38:6	PC ae C40:6	PC ae C40:2
								PC ae C40:4											dopamine 3-O-sulfate	dopamine 3-O-sulfate	docosahexaenoylcarnitine (C22:6)*	docosahexaenoylcarnitine (C22:6)*							1-stearoyl-2-arachidonoyl-GPE (18:0/20:4)					PC ae C40:1	PC ae C42:2	PC ae C40:3
								PC ae C40:5											eicosapentaenoylcholine	eicosapentaenoylcholine	docosahexaenoylcholine	docosahexaenoylcholine							2-oxoarginine*					PC ae C40:3	PC ae C42:4	PC ae C40:4
								PC ae C40:6											erythronate*	erythronate*	dopamine 3-O-sulfate	dopamine 3-O-sulfate							3-methoxycatechol sulfate (2)					PC ae C40:4	PC ae C42:5	PC ae C40:5
								PC ae C42:0											etiocholanolone glucuronide	etiocholanolone glucuronide	eicosapentaenoylcholine	eicosapentaenoylcholine							3-phosphoglycerate					PC ae C40:5	PC ae C44:3	PC ae C40:6
								PC ae C42:4											gamma-glutamylhistidine	gamma-glutamylhistidine	erythronate*	erythronate*							4-hydroxycoumarin					PC ae C40:6	PC ae C44:5	PC ae C42:2
								PC ae C42:5											gamma-glutamylmethionine	gamma-glutamylmethionine	fructose	fructose							5alpha-pregnan-3beta,20beta-diol monosulfate (1)					PC ae C42:2	PC ae C44:6	PC ae C42:4
								PC ae C44:4											gamma-glutamylphenylalanine	gamma-glutamylphenylalanine	fumarate	fumarate							5-hydroxylysine					PC ae C42:5	SDMA	PC ae C42:5
								PC ae C44:5											gamma-glutamyltyrosine	gamma-glutamyltyrosine	gamma-glutamylleucine	gamma-glutamylleucine							bilirubin (E,E)*					PC ae C44:5	SM (OH) C14:1	PC ae C44:3
								PC ae C44:6											gamma-glutamylvaline	gamma-glutamylvaline	gamma-glutamylphenylalanine	gamma-glutamylphenylalanine							caffeic acid sulfate					PC ae C44:6	SM (OH) C16:1	PC ae C44:5
								SM C16:0											gluconate	gluconate	gamma-glutamyltyrosine	gamma-glutamyltyrosine							catechol sulfate					SDMA	SM (OH) C22:1	PC ae C44:6
								SM C16:1											glucose	glucose	gamma-glutamylvaline	gamma-glutamylvaline							citrulline					SM (OH) C14:1	SM (OH) C22:2	SDMA
								SM (OH) C16:1											glutamate	glutamate	gluconate	gluconate							diacylglycerol (16:1/18:2 [2], 16:0/18:3 [1])*					SM (OH) C22:1	SM C16:0	SM (OH) C14:1
								SM C18:0											glycerate	glycerate	glucose	glucose							ferulic acid 4-sulfate					SM (OH) C22:2	SM C16:1	SM (OH) C16:1
								SM C18:1											glycerophosphoglycerol	glycerophosphoglycerol	glutamate	glutamate							gentisate					SM C16:0	SM C18:0	SM (OH) C22:2
								SM C20:2											glycochenodeoxycholate	glycochenodeoxycholate	glycerate	glycerate							glycerol					SM C18:0	SM C18:1	SM C16:0
								SM (OH) C22:1											glycochenodeoxycholate glucuronide (1)	glycochenodeoxycholate glucuronide (1)	glycerophosphoglycerol	glycerophosphoglycerol							glycochenodeoxycholate glucuronide (1)					SM C18:1	SM C24:0	SM C16:1
								SM (OH) C22:2											glycochenodeoxycholate sulfate	glycochenodeoxycholate sulfate	glycochenodeoxycholate	glycochenodeoxycholate							glycolithocholate sulfate*					SM C20:2	SM C24:1	SM C18:0
								SM C24:0											glycocholate	glycocholate	glycochenodeoxycholate glucuronide (1)	glycochenodeoxycholate glucuronide (1)							kynurenine					SM C24:0	SM C26:0	SM C18:1
								SM C24:1											glycodeoxycholate	glycodeoxycholate	glycocholate	glycocholate							leucine					SM C24:1	t4-OH-Pro	SM C20:2
								SM(OH) C24:1											glycodeoxycholate sulfate	glycodeoxycholate sulfate	glycodeoxycholate	glycodeoxycholate							linoleoyl-arachidonoyl-glycerol (18:2/20:4) [1]*					SM C26:0	Valerylcarnitine	SM C24:0
								SM C26:0											glycolithocholate	glycolithocholate	glycohyocholate	glycohyocholate							linoleoyl-docosahexaenoyl-glycerol (18:2/22:6) [1]*					t4-OH-Pro		SM C24:1
								SM C26:1											glycoursodeoxycholate	glycoursodeoxycholate	glycolithocholate	glycolithocholate							linoleoyl-linoleoyl-glycerol (18:2/18:2) [1]*					Valerylcarnitine		t4-OH-Pro
								DMA											hexadecanedioate	hexadecanedioate	glycoursodeoxycholate	glycoursodeoxycholate							mannose							Valerylcarnitine
								Taurine											hexanoylglutamine	hexanoylglutamine	hexadecanedioate	hexadecanedioate							methionine sulfoxide
								C2											hydantoin-5-propionic acid	hydantoin-5-propionic acid	hydantoin-5-propionic acid	hydantoin-5-propionic acid							myristoleate (14:1n5)
								C5-OH (C3-DC-M)											imidazole lactate	imidazole lactate	hydroquinone sulfate	hydroquinone sulfate							N6-acetyllysine
								C7-DC											indole-3-carboxylic acid	indole-3-carboxylic acid	imidazole lactate	imidazole lactate							N-acetylarginine
								C8											indolelactate	indolelactate	indole-3-carboxylic acid	indole-3-carboxylic acid							N-acetylglutamate
								C9											isoleucine	isoleucine	isobutyrylcarnitine (C4)	isobutyrylcarnitine (C4)							N-delta-acetylornithine
								C10											isovalerylcarnitine (C5)	isovalerylcarnitine (C5)	isoleucine	isoleucine							oleoyl ethanolamide
								C10:1											kynurenine	kynurenine	isovalerylcarnitine (C5)	isovalerylcarnitine (C5)							oleoyl-oleoyl-glycerol (18:1/18:1) [1]*
								C10:2											lanthionine	lanthionine	laurylcarnitine (C12)	laurylcarnitine (C12)							O-methylcatechol sulfate
								C12											leucine	leucine	leucine	leucine							palmitoleoyl-linoleoyl-glycerol (16:1/18:2) [1]*
								C12-DC											lidocaine	lidocaine	lidocaine	lidocaine							palmitoylcarnitine
								C14:1											linoleoylcarnitine (C18:2)*	linoleoylcarnitine (C18:2)*	linoleoylcholine*	linoleoylcholine*							palmitoyl-linoleoyl-glycerol (16:0/18:2) [1]*
								C14:1-OH											linoleoylcholine*	linoleoylcholine*	maleate	maleate							pregnanediol-3-glucuronide
								C14:2-OH											margaroylcarnitine*	margaroylcarnitine*	maltose	maltose							pregnanolone/allopregnanolone sulfate
								C18											methionine sulfoxide	methionine sulfoxide	mannitol/sorbitol	mannitol/sorbitol							proline
								Hexose											myristate (14:0)	myristate (14:0)	mannose	mannose							spermidine
								lysoPC a C24:0											myristoylcarnitine (C14)	myristoylcarnitine (C14)	mead acid (20:3n9)	mead acid (20:3n9)							sulfate*
								lysoPC a C26:0											N-(2-furoyl)glycine	N-(2-furoyl)glycine	methionine	methionine							thymol sulfate
								lysoPC a C28:1											N1-methylinosine	N1-methylinosine	methionine sulfoxide	methionine sulfoxide							trimethylamine N-oxide
								PC aa C24:0											N-acetylaspartate (NAA)	N-acetylaspartate (NAA)	methylmalonate (MMA)	methylmalonate (MMA)							urea
								PC aa C28:1											N-acetylglutamate	N-acetylglutamate	myristoleoylcarnitine (C14:1)*	myristoleoylcarnitine (C14:1)*							xanthurenate
								PC ae C30:2											N-ethylglycinexylidide	N-ethylglycinexylidide	N-(2-furoyl)glycine	N-(2-furoyl)glycine
								PC ae C32:1											nicotinamide	nicotinamide	N2,N2-dimethylguanosine	N2,N2-dimethylguanosine
								PC ae C36:0											N-methylalanine	N-methylalanine	N-acetylarginine	N-acetylarginine
								PC ae C40:2											N-palmitoyl-heptadecasphingosine (d17:1/16:0)*	N-palmitoyl-heptadecasphingosine (d17:1/16:0)*	N-acetylglutamate	N-acetylglutamate
								PC ae C42:1											N-palmitoyl-sphingadienine (d18:2/16:0)*	N-palmitoyl-sphingadienine (d18:2/16:0)*	N-acetylleucine	N-acetylleucine
								PC ae C42:2											N-palmitoyl-sphinganine (d18:0/16:0)	N-palmitoyl-sphinganine (d18:0/16:0)	N-acetylmethionine	N-acetylmethionine
								PC ae C42:3											N-palmitoyl-sphingosine (d18:1/16:0)	N-palmitoyl-sphingosine (d18:1/16:0)	N-ethylglycinexylidide	N-ethylglycinexylidide
								PC ae C44:3											N-stearoyl-sphingadienine (d18:2/18:0)*	N-stearoyl-sphingadienine (d18:2/18:0)*	nicotinamide	nicotinamide
								SM (OH) C14:1											N-stearoyl-sphinganine (d18:0/18:0)*	N-stearoyl-sphinganine (d18:0/18:0)*	N-methylalanine	N-methylalanine
								Aspartate											octadecanedioate	octadecanedioate	N-palmitoyl-sphinganine (d18:0/16:0)	N-palmitoyl-sphinganine (d18:0/16:0)
								Tyrosine											oleoylcholine	oleoylcholine	octadecanedioate	octadecanedioate
								C3											ornithine	ornithine	octanoylcarnitine (C8)	octanoylcarnitine (C8)
								C5											orotate	orotate	oleoylcholine	oleoylcholine
								lysoPC a C14:0											palmitoloelycholine	palmitoloelycholine	ornithine	ornithine
								PC aa C32:0											palmitoylcholine	palmitoylcholine	palmitoloelycholine	palmitoloelycholine
								PC aa C32:1											pentadecanoate (15:0)	pentadecanoate (15:0)	palmitoylcholine	palmitoylcholine
								PC aa C34:2											phenylalanine	phenylalanine	phenylalanine	phenylalanine
								PC aa C34:3											phenyllactate (PLA)	phenyllactate (PLA)	phenyllactate (PLA)	phenyllactate (PLA)
								PC aa C36:0											pregnenolone sulfate	pregnenolone sulfate	phenylpyruvate	phenylpyruvate
								PC aa C36:2											proline	proline	proline	proline
								PC aa C36:3											prolylglycine	prolylglycine	prolylglycine	prolylglycine
								PC aa C36:5											pyridoxal	pyridoxal	pyridoxal	pyridoxal
								PC ae C36:2											pyrraline	pyrraline	pyridoxate	pyridoxate
								PC ae C38:2											sebacate (decanedioate)	sebacate (decanedioate)	pyrraline	pyrraline
																			serine	serine	pyruvate	pyruvate
																			S-methylmethionine	S-methylmethionine	ribonate	ribonate
																			stearoyl ethanolamide	stearoyl ethanolamide	S-1-pyrroline-5-carboxylate	S-1-pyrroline-5-carboxylate
																			stearoylcholine*	stearoylcholine*	sarcosine	sarcosine
																			suberate (octanedioate)	suberate (octanedioate)	serine	serine
																			sucrose	sucrose	S-methylmethionine	S-methylmethionine
																			taurochenodeoxycholate	taurochenodeoxycholate	stearoylcholine*	stearoylcholine*
																			taurocholate	taurocholate	sucrose	sucrose
																			taurodeoxycholate	taurodeoxycholate	taurochenodeoxycholate	taurochenodeoxycholate
																			tauroursodeoxycholate	tauroursodeoxycholate	taurocholate	taurocholate
																			tyramine O-sulfate	tyramine O-sulfate	tauroursodeoxycholate	tauroursodeoxycholate
																			tyrosine	tyrosine	threonine	threonine
																			valine	valine	tryptophan	tryptophan
																			xylose	xylose	tyramine O-sulfate	tyramine O-sulfate
																			1,2-dipalmitoyl-GPC (16:0/16:0)	1-(1-enyl-stearoyl)-2-oleoyl-GPE (P-18:0/18:1)	tyrosine	tyrosine
																			17alpha-hydroxypregnenolone 3-sulfate	1,2,3-benzenetriol sulfate (2)	valine	valine
																			1-linoleoyl-GPC (18:2)	1,3,7-trimethylurate	xanthine	xanthine
																			1-palmitoyl-2-arachidonoyl-GPC (16:0/20:4n6)	10-heptadecenoate (17:1n7)	xylose	xylose
																			1-palmitoyl-2-arachidonoyl-GPI (16:0/20:4)*	10-nonadecenoate (19:1n9)	(N(1) + N(8))-acetylspermidine	1-(1-enyl-palmitoyl)-GPC (P-16:0)*
																			1-palmitoyl-2-linoleoyl-GPC (16:0/18:2)	10-undecenoate (11:1n1)	1-(1-enyl-oleoyl)-GPE (P-18:1)*	1,2,3-benzenetriol sulfate (2)
																			1-palmitoyl-2-stearoyl-GPC (16:0/18:0)	16-hydroxypalmitate	1-arachidonoyl-GPE (20:4n6)*	1,2-dilinoleoyl-GPC (18:2/18:2)
																			1-palmitoyl-GPC (16:0)	17-methylstearate	1-arachidonylglycerol (20:4)	13-HODE + 9-HODE
																			1-palmitoyl-GPE (16:0)	1-arachidonoyl-GPI (20:4)*	1-myristoylglycerol (14:0)	1-dihomo-linolenylglycerol (20:3)
																			1-stearoyl-2-linoleoyl-GPC (18:0/18:2)*	1-linolenoyl-GPC (18:3)*	1-oleoyl-2-linoleoyl-GPE (18:1/18:2)*	1-docosahexaenoylglycerol (22:6)
																			1-stearoyl-GPE (18:0)	1-linoleoyl-GPI (18:2)*	1-palmitoyl-2-linoleoyl-GPI (16:0/18:2)	1-methylhistidine
																			2-hydroxy-3-methylvalerate	1-methylhistidine	1-stearoyl-2-arachidonoyl-GPI (18:0/20:4)	2,3-dihydroxyisovalerate
																			2-keto-3-deoxy-gluconate	1-palmitoleoyl-2-linolenoyl-GPC (16:1/18:3)*	1-stearoyl-2-linoleoyl-GPE (18:0/18:2)*	2-aminoheptanoate
																			3-methyl-2-oxovalerate	1-palmitoyl-2-oleoyl-GPI (16:0/18:1)*	21-hydroxypregnenolone disulfate	2-hydroxy-3-methylvalerate
																			4-acetylphenol sulfate	1-palmitoyl-GPI (16:0)	2-linoleoylglycerol (18:2)	2-hydroxydecanoate
																			4-methyl-2-oxopentanoate	1-stearoyl-2-arachidonoyl-GPI (18:0/20:4)	3-aminoisobutyrate	2-hydroxyoctanoate
																			4-vinylguaiacol sulfate	1-stearoyl-2-linoleoyl-GPI (18:0/18:2)	3-methylglutaconate	3-(3-hydroxyphenyl)propionate
																			5-(galactosylhydroxy)-L-lysine	1-stearoyl-2-oleoyl-GPE (18:0/18:1)	3-ureidopropionate	3-hydroxybutyrate (BHBA)
																			5-oxoproline	2,3-dihydroxyisovalerate	5-(galactosylhydroxy)-L-lysine	3-hydroxyhippurate
																			alpha-hydroxyisovalerate	2-aminoadipate	5,6-dihydrothymine	3-hydroxyoctanoate
																			anthranilate	2-hydroxydecanoate	5-hydroxylysine	3-methoxycatechol sulfate (1)
																			arachidoylcarnitine (C20)*	2-hydroxyhippurate (salicylurate)	5-oxoproline	3-methylcytidine
																			arginine	2-hydroxynervonate*	acesulfame	4-methyl-2-oxopentanoate
																			ascorbate (Vitamin C)	2-hydroxyphenylacetate	alanine	4-methylcatechol sulfate
																			betaine	2-methylbutyrylcarnitine (C5)	beta-alanine	4-vinylguaiacol sulfate
																			bilirubin (E,Z or Z,E)*	2-oxoarginine*	beta-citrylglutamate	4-vinylphenol sulfate
																			ceramide (d18:1/20:0, d16:1/22:0, d20:1/18:0)*	3-(3-hydroxyphenyl)propionate	bradykinin, des-arg(9)	acisoga
																			cerotoylcarnitine (C26)*	3-hydroxy-2-ethylpropionate	chiro-inositol	ADpSGEGDFXAEGGGVR*
																			chiro-inositol	3-hydroxybutyrate (BHBA)	creatinine	adrenoylcarnitine (C22:4)*
																			cysteine sulfinic acid	3-hydroxybutyrylcarnitine (2)	ectoine	allantoin
																			dihomo-linolenoylcarnitine (20:3n3 or 6)*	3-hydroxydecanoate	eicosanodioate	alpha-hydroxyisocaproate
																			dihomo-linoleoylcarnitine (C20:2)*	3-hydroxyhippurate	ethyl glucuronide	arabinose
																			docosapentaenoylcarnitine (C22:5n3)*	3-hydroxylaurate	etiocholanolone glucuronide	arabonate/xylonate
																			ectoine	3-methyl catechol sulfate (1)	gamma-glutamyl-alpha-lysine	arachidonoylcarnitine (C20:4)
																			ethyl glucuronide	3-methyladipate	gamma-glutamylglutamate	argininate*
																			eugenol sulfate	4-ethylphenylsulfate	gamma-glutamylhistidine	bilirubin (E,E)*
																			fructose	4-guanidinobutanoate	gamma-glutamylmethionine	bilirubin (E,Z or Z,E)*
																			fumarate	4-imidazoleacetate	indolelactate	bilirubin (Z,Z)
																			gamma-glutamyl-alpha-lysine	5-bromotryptophan	lysine	biliverdin
																			gamma-glutamylglutamate	5-dodecenoate (12:1n7)	methyl glucopyranoside (alpha + beta)	caffeine
																			gamma-glutamylisoleucine*	5-methylthioadenosine (MTA)	methylsuccinate	chenodeoxycholate
																			glycohyocholate	acetoacetate	N1-methylinosine	cholate
																			glycosyl-N-(2-hydroxynervonoyl)-sphingosine (d18:1/24:1(2OH))*	acetylcarnitine (C2)	N-acetyl-beta-alanine	deoxycholate
																			heme	acisoga	N-acetylglutamine	dihomo-linolenate (20:3n3 or n6)
																			histidine	adipoylcarnitine (C6-DC)	N-acetylphenylalanine	dihomo-linolenoylcarnitine (20:3n3 or 6)*
																			hydroquinone sulfate	adrenate (22:4n6)	nervonoylcarnitine (C24:1)*	dihomo-linoleoylcarnitine (C20:2)*
																			lactate	arachidate (20:0)	N-methylproline	docosapentaenoate (n6 DPA; 22:5n6)
																			laurylcarnitine (C12)	arachidonoylcarnitine (C20:4)	orotate	docosapentaenoylcarnitine (C22:5n3)*
																			mannitol/sorbitol	azelate (nonanedioate)	pregnenolone sulfate	DSGEGDFXAEGGGVR*
																			mannose	beta-citrylglutamate	stachydrine	eicosenoylcarnitine (C20:1)*
																			methionine	caffeine	thioproline	erucate (22:1n9)
																			methylmalonate (MMA)	carnitine	trans-urocanate	eugenol sulfate
																			N1-methyladenosine	chenodeoxycholate	trimethylamine N-oxide	ferulic acid 4-sulfate
																			N2,N2-dimethylguanosine	choline	vanillic alcohol sulfate	galactonate
																			N-acetylasparagine	cis-4-decenoylcarnitine (C10:1)		gamma-CEHC
																			N-acetylleucine	citrulline		gamma-glutamylisoleucine*
																			N-acetylmethionine	cystathionine		gamma-glutamyltryptophan
																			N-behenoyl-sphingadienine (d18:2/22:0)*	cytidine		glucuronate
																			nervonoylcarnitine (C24:1)*	decanoylcarnitine (C10)		glycodeoxycholate sulfate
																			N-methylproline	deoxycarnitine		guanine
																			N-stearoyl-sphingosine (d18:1/18:0)*	deoxycholate		homocitrulline
																			oleoylcarnitine (C18:1)	diacylglycerol (14:0/18:1, 16:0/16:1) [2]*		HWESASXX*
																			palmitoylcarnitine (C16)	dihomo-linoleate (20:2n6)		imidazole propionate
																			palmitoyl-linoleoyl-glycerol (16:0/18:2) [1]*	dihydroferulic acid		indoleacetate
																			palmitoyl-linoleoyl-glycerol (16:0/18:2) [2]*	dihydroorotate		lactate
																			phenylpyruvate	docosadienoate (22:2n6)		lanthionine
																			propyl 4-hydroxybenzoate sulfate	docosatrienoate (22:3n3)		linoleoylcarnitine (C18:2)*
																			pyridoxate	docosatrienoate (22:3n6)*		malate
																			pyruvate	eicosenoate (20:1)		myristoylcholine*
																			ribonate	erucate (22:1n9)		N6,N6,N6-trimethyllysine
																			S-1-pyrroline-5-carboxylate	ethylmalonate		N-acetylalliin
																			spermidine	gamma-glutamyl-epsilon-lysine		N-acetylasparagine
																			sphingomyelin (d17:2/16:0, d18:2/15:0)*	gamma-glutamylleucine		N-acetylcitrulline
																			sphingomyelin (d18:1/18:1, d18:2/18:0)	glucuronate		N-acetylproline
																			sphingomyelin (d18:1/24:1, d18:2/24:0)*	glutarate (pentanedioate)		N-behenoyl-sphingadienine (d18:2/22:0)*
																			sphingomyelin (d18:2/14:0, d18:1/14:1)*	guanine		nervonate (24:1n9)*
																			sphingomyelin (d18:2/23:0, d18:1/23:1, d17:1/24:1)*	hippurate		N-formylmethionine
																			sphingomyelin (d18:2/24:1, d18:1/24:2)*	imidazole propionate		oleoylcarnitine (C18:1)
																			stachydrine	indolin-2-one		palmitoleoylcarnitine (C16:1)*
																			stearoylcarnitine (C18)	isobutyrylcarnitine (C4)		palmitoleoyl-oleoyl-glycerol (16:1/18:1) [1]*
																			taurine	laurate (12:0)		perfluorooctanesulfonic acid (PFOS)
																			thioproline	linolenate [alpha or gamma; (18:3n3 or 6)]		phenylacetylcarnitine
																			threonine	linoleoyl-linoleoyl-glycerol (18:2/18:2) [1]*		phytanate
																			vanillic alcohol sulfate	L-urobilin		pipecolate
																			xanthine	maleate		pro-hydroxy-pro
																				malonate		ribitol
																				margarate (17:0)		salicylate
																				methylphosphate		S-allylcysteine
																				methylsuccinate		S-methylcysteine
																				myristoleate (14:1n5)		spermidine
																				myristoleoylcarnitine (C14:1)*		suberate (octanedioate)
																				N1-Methyl-2-pyridone-5-carboxamide		succinate
																				N1-Methyl-4-pyridone-3-carboxamide		tartarate
																				N6,N6,N6-trimethyllysine		taurodeoxycholate
																				N-acetyl-1-methylhistidine*		thyroxine
																				N-acetyl-3-methylhistidine*		trans-4-hydroxyproline
																				N-acetylarginine		trigonelline (N'-methylnicotinate)
																				N-acetyl-aspartyl-glutamate (NAAG)		urea
																				N-acetylneuraminate		ursodeoxycholate
																				N-acetylproline
																				N-acetyltryptophan
																				nervonate (24:1n9)*
																				N-formylanthranilic acid
																				nonadecanoate (19:0)
																				N-trimethyl 5-aminovalerate
																				octanoylcarnitine (C8)
																				oleate/vaccenate (18:1)
																				O-sulfo-L-tyrosine
																				palmitate (16:0)
																				palmitoyl-arachidonoyl-glycerol (16:0/20:4) [1]*
																				palmitoyl-arachidonoyl-glycerol (16:0/20:4) [2]*
																				paraxanthine
																				phenylacetylcarnitine
																				phosphoethanolamine
																				phytanate
																				pimelate (heptanedioate)
																				pristanate
																				propionylcarnitine (C3)
																				quinate
																				salicylate
																				stearate (18:0)
																				sulfate*
																				trigonelline (N'-methylnicotinate)
																				urate
																				uridine
																				ursodeoxycholate

## Sheet: TS3 Urine Study Data
Author(s) / Year	Walsh et al (2006)	Slupsky et al (2007)	Kim et al (2014)	Giskeodegard et al (2015)				Papantoniou et al (2015)
Study type	Diurnal time course ³24 h	Diurnal time course <24 h	Diurnal time course <24 h	Diurnal time course ³24 h				Diurnal time course ³24 h
Additional conditions (if applicable)	Non standardized vs standardized diet			Rhyhtmic on Day 1 (Wake sleep)	Rhyhtmic on Day 2 (Sleep Deprivation)	Decreased during sleep night vs sleep deprivation	Increased during sleep night vs sleep deprivation	Premenopausal women Day vs night workers for significant change in abundance
Bio fluid	Urine	Urine	Urine	Urine				Urine
Metabolites	Creatinine	Creatinine		2-hydroxyisobutyrate	2-hydroxyisobutyrate	Dimethylamine	Taurine	Pregnanediol
(Sig Rhy)		Dimethylamine		TMAO	TMAO	4-DTA	Formate	Pregnanetriol
		Acetone		Hippurate	Hippurate	Creatinine	Citrate	16-Androstenol
		Xylose		Xylose	Xylose	Ascorbate	3-indoxyl sulfate	Testosterone
		Mannitol		Trigonelline	Trigonelline	2-hydroxyisobutyrate	Carnitine	3a,5a-Androstanediol
		1-Methylnicotinamide			Phenylacetylglutamine	Allantoin	3-hydroxyisobutyrate
					Acetate	4-DEA	TMAO
						4-hydroxyphenylacetate	Acetate

## Sheet: TS4 Saliva Study Data
Author(s) / Year	Walsh et al (2006)	Dallmann et al (2012)	Dame et al (2015)	Skarke et al (2017)
Study type	Diurnal time course <24 h	Circadian	Diurnal time course <24 h	Diurnal Timecourse >24h
Additional conditions (if applicable)	Non standardized vs standardized diet
Bio fluid	Urine	Saliva	Saliva	Saliva
Metabolites	Acetate	3-dehydrocarnitine	acetate	Ornithine
(Sig Rhy)		8-hydroxyoctanoate	isobutyrate	Xanthine
		Ethanolamine	propionate	Porphobilinogen
		3-methyl-2-oxobutyrate	L-leucine	Biphosphoglycerates
		3-methyl-2-oxovalerate	L-alanine	Niacin
		3-phenylpropionate (hydrocinnamate)	betaine	Methyl-4-pyridone-5-carboxamide, oxypurinal, Xanthine
		4-hydroxyphenylacetate	glycine	Abscisic aicd, Methoxykynurenine
		4-methyl-2-oxopentanoate	urea	1-(2-hydroxyethyl)-1-methylguanidine, N-Methyl-a-aminoisobutyric acid, Guanidineacetic acid, Indole
		arginine
		creatine
		creatinine
		histidine
		levulinate (4-oxovalerate)
		N-acetylmethionine
		N-carbamoylaspartate
		ornithine
		p-cresol sulfate
		serine
		tyrosine
		galactose
		N-acetylgalactosamine
		heptaethylene glycol
		tetraethylene glycol
		trihydroxybutane
		cis-aconitate
		citrate
		fumarate
		succinate
		Glycyltyrosine
		Pyroglutamylglutamine
		threonylphenylalanine

## Sheet: TS5 Breath Study Data
Author(s) / Year	Wilkinson et al (2019)
Study type	Diurnal time course ³24 h
Additional conditions (if applicable)	Healthy and Asthmatic participants	Healthy	Asthmatic
Significant rhythmic/diurnally variable Metabolites	Chloro-benzene	Xylene	Acetone
	Isoprene	Isobutylacetate	Isoprene
	Dimethoxymethane		Camphene
	1-butoxy, 2-propanol

## Sheet: TS6 Muscle Study Data
Author(s) / Year	Sato et al (2018)				Held et al (2020)	Loizides-Mangold et al (2017)
Study type	Diurnal time course <24 h				Diurnal time course >24 h	Diurnal time course ³24 h
Additional conditions (if applicable)	Significantly 'gradient' serum metabolites before HFD	Significantly 'gradient' serum metabolites after HFD	Significantly 'gradient' serum metabolites before HCD	Significantly 'gradient' serum metabolites after HCD
Bio fluid	Muscle (Light blue - common to both before/after HFD)		Muscle (Light orange - common to both before/after HFD)		Muscle	Muscle (light blue - listed as 30 most significantly rhythmic, light orange significant in at least >=3 of 7 participants)
Metabolites	1-(1-enyl-stearoyl)-2-oleoyl-GPE (P-18:0/18:1)	1-(1-enyl-stearoyl)-2-oleoyl-GPE (P-18:0/18:1)	10-heptadecenoate (17:1n7)	10-heptadecenoate (17:1n7)	List of observed metabolites provided, those (126 total) of significance not labelled	GlcCer42:2
(Sig Rhy)	2-hydroxybutyrate/2-hydroxyisobutyrate	2-hydroxybutyrate/2-hydroxyisobutyrate	2-hydroxybutyrate/2-hydroxyisobutyrate	2-hydroxybutyrate/2-hydroxyisobutyrate		SM38:1
	2-methylbutyrylcarnitine (C5)	2-methylbutyrylcarnitine (C5)	2-hydroxyglutarate	2-hydroxyglutarate		SM42:2
	3-(4-hydroxyphenyl)lactate	3-(4-hydroxyphenyl)lactate	2-methylbutyrylcarnitine (C5)	2-methylbutyrylcarnitine (C5)		LysoPI
	3-hydroxyisobutyrate	3-hydroxyisobutyrate	3-hydroxyisobutyrate	3-hydroxyisobutyrate		PC(O)36:4
	6-phosphogluconate	6-phosphogluconate	acisoga	acisoga		PC(O)36:6
	acisoga	acisoga	ceramide (d18:1/17:0, d17:1/18:0)*	ceramide (d18:1/17:0, d17:1/18:0)*		PC32:2
	cytidine	cytidine	cholesterol	cholesterol		PC34:4
	cytidine 5'-diphosphocholine	cytidine 5'-diphosphocholine	cytidine	cytidine		GlcCer34:1
	glycochenodeoxycholate	glycochenodeoxycholate	cytidine 5'-diphosphocholine	cytidine 5'-diphosphocholine		GlcDHCer34:1
	isobutyrylcarnitine (C4)	isobutyrylcarnitine (C4)	dihomo-linoleate (20:2n6)	dihomo-linoleate (20:2n6)		PC(O)32:0
	isovalerylcarnitine (C5)	isovalerylcarnitine (C5)	erucate (22:1n9)	erucate (22:1n9)		PC(O)32:6
	lactosyl-N-nervonoyl-sphingosine (d18:1/24:1)*	lactosyl-N-nervonoyl-sphingosine (d18:1/24:1)*	fructose	fructose		PC(O)34:4
	lactosyl-N-palmitoyl-sphingosine (d18:1/16:0)	lactosyl-N-palmitoyl-sphingosine (d18:1/16:0)	glucose	glucose		PC(O)36:2
	maltose	maltose	glutamate	glutamate		PC(O)36:3
	N-acetylasparagine	N-acetylasparagine	glycochenodeoxycholate	glycochenodeoxycholate		PC(O)36:5
	pyrraline	pyrraline	glycocholate	glycocholate		PC30:0
	sphingadienine	sphingadienine	isobutyrylcarnitine (C4)	isobutyrylcarnitine (C4)		PC32:1
	1-(1-enyl-oleoyl)-GPE (P-18:1)*	1-palmitoleoylglycerol (16:1)*	isovalerylcarnitine (C5)	isovalerylcarnitine (C5)		PC34:2
	1-(1-enyl-palmitoyl)-2-palmitoleoyl-GPC (P-16:0/16:1)*	1-palmitoyl-2-linoleoyl-GPC (16:0/18:2)	lactosyl-N-nervonoyl-sphingosine (d18:1/24:1)*	lactosyl-N-nervonoyl-sphingosine (d18:1/24:1)*		PC36:3
	1-(1-enyl-palmitoyl)-GPE (P-16:0)*	3-hydroxybutyrate (BHBA)	lactosyl-N-palmitoyl-sphingosine (d18:1/16:0)	lactosyl-N-palmitoyl-sphingosine (d18:1/16:0)		PC36:5
	1-(1-enyl-stearoyl)-GPE (P-18:0)*	3-hydroxybutyrylcarnitine (1)	maltose	maltose		PE(O)34:4
	1,2-dipalmitoyl-GPE (16:0/16:0)*	3-methylglutaconate	margarate (17:0)	margarate (17:0)		PE34:4
	10-heptadecenoate (17:1n7)	4-methyl-2-oxopentanoate	N-stearoyl-sphingadienine (d18:2/18:0)*	N-stearoyl-sphingadienine (d18:2/18:0)*		PE36:0
	1-arachidonoyl-GPI (20:4)*	beta-citrylglutamate	N-stearoyl-sphingosine (d18:1/18:0)*	N-stearoyl-sphingosine (d18:1/18:0)*		PE38:1
	1-oleoyl-2-arachidonoyl-GPI (18:1/20:4) *	caffeine	oleate/vaccenate (18:1)	oleate/vaccenate (18:1)		PI42:1
	1-oleoyl-2-linoleoyl-GPE (18:1/18:2)*	choline phosphate	ornithine	ornithine		PI42:2
	1-oleoylglycerol (18:1)	glycine	palmitate (16:0)	palmitate (16:0)		PS40:6
	1-palmitoyl-2-arachidonoyl-GPI (16:0/20:4)*	lidocaine	phenyllactate (PLA)	phenyllactate (PLA)		SM40:2
	1-palmitoyl-2-oleoyl-GPG (16:0/18:1)	methionine sulfoxide	succinate	succinate		TAG44:6
	1-palmitoyl-2-stearoyl-GPC (16:0/18:0)	N1-Methyl-4-pyridone-3-carboxamide	1-(1-enyl-stearoyl)-2-arachidonoyl-GPE (P-18:0/20:4)*	1-(1-enyl-stearoyl)-2-oleoyl-GPE (P-18:0/18:1)		Cer34:1(-H2O)
	1-stearoyl-2-arachidonoyl-GPI (18:0/20:4)	oleoyl-linolenoyl-glycerol (18:1/18:3) [2]*	1-oleoylglycerol (18:1)	1,2-dipalmitoyl-GPC (16:0/16:0)		CL74:10_C18:2
	1-stearoyl-2-arachidonoyl-GPS (18:0/20:4)	propionylcarnitine (C3)	3-hydroxybutyrylcarnitine (2)	1,2-dipalmitoyl-GPE (16:0/16:0)*		GlcCer28:2
	1-stearoyl-2-linoleoyl-GPS (18:0/18:2)	pseudouridine	3-methyl-2-oxovalerate	10-nonadecenoate (19:1n9)		GlcCer32:1
	1-stearoyl-2-oleoyl-GPE (18:0/18:1)	stearoyl-linoleoyl-glycerol (18:0/18:2) [2]*	adenosine	15-methylpalmitate		GlcCer34:1(-H2O)
	1-stearoyl-2-oleoyl-GPS (18:0/18:1)	sulfate*	alpha-ketoglutarate	17-methylstearate		GlcCer42:1(-H2O)
	1-stearoyl-GPE (18:0)		beta-citrylglutamate	1-linoleoyl-2-arachidonoyl-GPC (18:2/20:4n6)*		GlcCer42:2; GlcCer42:1-OH(-H2O)
	2-hydroxyglutarate		butyrylcarnitine (C4)	1-methylhistamine		GlcCer44:1(-H2O)
	3-hydroxybutyrylcarnitine (2)		ceramide (d18:1/14:0, d16:1/16:0)*	1-methylhistidine		GlcCer44:2(-H2O)
	acetyl CoA		ceramide (d18:1/20:0, d16:1/22:0, d20:1/18:0)*	1-oleoyl-2-arachidonoyl-GPE (18:1/20:4)*		GlcDHCer30:1(-H2O)
	alanylleucine		ceramide (d18:2/24:1, d18:1/24:2)*	1-oleoyl-GPC (18:1)		GlcDHCer32:0(-H2O)
	butyrylcarnitine (C4)		choline phosphate	1-palmitoyl-2-arachidonoyl-GPE (16:0/20:4)*		GlcDHCer34:1; GlcDHCer34:0-OH(-H2O)
	ceramide (d18:1/20:0, d16:1/22:0, d20:1/18:0)*		glycine	1-palmitoyl-2-arachidonoyl-GPI (16:0/20:4)*		GlcDHCer40:1; GlcDHCer40:0-OH(-H2O)
	coenzyme A		hexanoylcarnitine (C6)	1-palmitoyl-2-docosahexaenoyl-GPE (16:0/22:6)*		GlcDHCer44:0
	cysteine		lignoceroylcarnitine (C24)*	1-palmitoyl-2-linoleoyl-GPE (16:0/18:2)		LysoPC18:0
	cytidine 5'-monophospho-N-acetylneuraminic acid		linolenate [alpha or gamma; (18:3n3 or 6)]	1-palmitoyl-2-oleoyl-GPE (16:0/18:1)		LysoPI14:0
	cytidine-5'-diphosphoethanolamine		linoleoyl ethanolamide	1-palmitoyl-2-stearoyl-GPC (16:0/18:0)		LysoPI16:0
	dimethylglycine		myristoleate (14:1n5)	1-stearoyl-2-arachidonoyl-GPC (18:0/20:4)		LysoPI16:1
	ethylmalonate		N-methylproline	1-stearoyl-2-docosahexaenoyl-GPC (18:0/22:6)		LysoPI18:0
	fructose		N-palmitoyl-sphingadienine (d18:2/16:0)*	1-stearoyl-2-oleoyl-GPE (18:0/18:1)		LysoPI18:1
	galactonate		palmitoleate (16:1n7)	2,3-dihydroxyisovalerate		LysoPI20:0
	glutamate		palmitoyl ethanolamide	2-stearoyl-GPE (18:0)*		LysoPI22:0
	glycocholate		phosphoethanolamine	3-(4-hydroxyphenyl)lactate		LysoPI22:1
	glycodeoxycholate		S-adenosylmethionine (SAM)	3-hydroxy-3-methylglutarate		PC(O-)30:4
	glycosyl-N-stearoyl-sphingosine (d18:1/18:0)		sphingadienine	3-hydroxybutyrate (BHBA)		PC(O-)32:0
	glycylvaline		sphingomyelin (d18:1/18:1, d18:2/18:0)	3-indoxyl sulfate		PC(O-)32:1
	linolenate [alpha or gamma; (18:3n3 or 6)]		stachydrine	3-methyl-2-oxobutyrate		PC(O-)32:2
	maleate		stearoyl ethanolamide	3-methylglutaconate		PC(O-)32:6
	methylmalonate (MMA)		trimethylamine N-oxide	6-phosphogluconate		PC(O-)34:0
	nicotinamide			adenine		PC(O-)34:3
	N-methylproline			adenosine 3',5'-cyclic monophosphate (cAMP)		PC(O-)34:6
	N-palmitoyl-sphinganine (d18:0/16:0)			AICA ribonucleotide		PC(O-)36:2
	N-stearoyl-sphingosine (d18:1/18:0)*			alanylleucine		PC(O-)36:3
	palmitoleate (16:1n7)			alpha-hydroxyisovalerate		PC(O-)36:4
	phenyllactate (PLA)			androstenediol (3beta,17beta) disulfate (1)		PC(O-)36:5
	proline			androsterone sulfate		PC(O-)36:6
	pyruvate			arabonate/xylonate		PC(O-)38:4
	sedoheptulose-7-phosphate			arachidate (20:0)		PC(O-)38:5
	sphingomyelin (d18:1/17:0, d17:1/18:0, d19:1/16:0)			aspartate		PC(O-)38:6
	stearate (18:0)			behenate (22:0)*		PC32:3
	succinate			behenoyl dihydrosphingomyelin (d18:0/22:0)*		PC34:0
	thioproline			beta-hydroxyisovalerate		PC34:1
	tiglylcarnitine (C5:1-DC)			caffeine		PC34:3
	UDP-glucuronate			ceramide (d16:1/24:1, d18:1/22:1)*		PC36:0
	valylglycine			C-glycosyltryptophan		PC36:4
				choline		PC36:6
				coenzyme A		PC38:0
				creatine phosphate		PE(O-)34:3
				cysteine		PE(O-)34:4
				cytidine 5'-monophospho-N-acetylneuraminic acid		PE(O-)36:5
				dehydroisoandrosterone sulfate (DHEA-S)		PE(O-)38:6
				dihomo-linolenate (20:3n3 or n6)		PE32:0
				dihydroxyacetone phosphate (DHAP)		PE38:0
				dimethylglycine		PE40:5
				docosadienoate (22:2n6)		PI(O-)42:4
				docosapentaenoate (n6 DPA; 22:5n6)		PI28:4
				eicosenoate (20:1)		PI30:5
				erythronate*		PI32:0
				galactonate		PI34:4
				gamma-glutamylcysteine		PI38:2
				gamma-glutamyl-epsilon-lysine		PI38:3
				gamma-glutamylglutamine		PI40:1
				gluconate		PS36:2
				glutamate, gamma-methyl ester		PS40:5
				glutathione, reduced (GSH)		SM30:0-OH
				glycerate		SM30:3-OH; SM32:0(-H2O)
				glycodeoxycholate		SM32:0
				glycosyl-N-palmitoyl-sphingosine (d18:1/16:0)		SM32:0-OH(-H2O); SM32:1
				glycylvaline		SM32:1-OH(-H2O); SM32:2
				heme		SM32:2-OH
				indoleacetate		SM34:0-OH
				indolelactate		SM34:1-OH(-H2O); SM34:2
				laurylcarnitine (C12)		SM34:2-OH
				leucine		SM36:2; SM36:1-OH(-H2O)
				leucylglycine		SM36:2-OH
				linoleoyl-arachidonoyl-glycerol (18:2/20:4) [2]*		SM38:1; SM38:0-OH(-H2O)
				linoleoyl-linoleoyl-glycerol (18:2/18:2) [2]*		SM38:2-OH
				methionine sulfoxide		SM40:1-OH
				methylphosphate		SM40:2(-H2O)
				myristoyl dihydrosphingomyelin (d18:0/14:0)*		SM40:3-OH; SM42:0(-H2O)
				N6-acetyllysine		SM42:1-OH
				N-acetylalanine		SM42:2(-H2O)
				N-acetylmethionine		SM42:2-OH
				nervonate (24:1n9)*		SM42:3; SM42:2-OH(-H2O)
				N-formylmethionine		SM42:3-OH(-H2O)
				nonadecanoate (19:0)		SM42:3-OH; SM44:0(-H2O)
				N-palmitoyl-sphinganine (d18:0/16:0)		SM44:2
				N-palmitoyl-sphingosine (d18:1/16:0)		TG44:6
				N-stearoyl-sphinganine (d18:0/18:0)*		TG50:3
				oleoyl-linoleoyl-glycerol (18:1/18:2) [1]
				oleoyl-linoleoyl-glycerol (18:1/18:2) [2]
				oleoyl-oleoyl-glycerol (18:1/18:1) [1]*
				oleoyl-oleoyl-glycerol (18:1/18:1) [2]*
				orotate
				palmitoyl dihydrosphingomyelin (d18:0/16:0)*
				palmitoyl sphingomyelin (d18:1/16:0)
				palmitoyl-docosahexaenoyl-glycerol (16:0/22:6) [1]*
				palmitoyl-docosahexaenoyl-glycerol (16:0/22:6) [2]*
				palmitoyl-oleoyl-glycerol (16:0/18:1) [2]*
				phenol sulfate
				phenylalanine
				pipecolate
				proline
				propionylcarnitine (C3)
				pyrraline
				S-1-pyrroline-5-carboxylate
				S-adenosylhomocysteine (SAH)
				S-allylcysteine
				sedoheptulose-7-phosphate
				S-methylcysteine
				sphinganine
				sphingomyelin (d17:1/16:0, d18:1/15:0, d16:1/17:0)*
				sphingomyelin (d18:1/20:1, d18:2/20:0)*
				stearate (18:0)
				stearoyl sphingomyelin (d18:1/18:0)
				stearoyl-arachidonoyl-glycerol (18:0/20:4) [1]*
				sulfate*
				thioproline
				tiglylcarnitine (C5:1-DC)
				trans-4-hydroxyproline
				tryptophan
				tryptophan betaine
				tyrosine
				UDP-glucuronate
				UDP-N-acetylglucosamine/galactosamine
				urate
				urea
				uridine
				valine
				xanthine
