# Supplementary material for: Tick-Tock Consider the Clock: The Influence of Circadian and External Cycles on Time of Day Variation in the Human Metabolome—A Review
Source: Metabolites. 2021 May 19;11(5):328. doi: 10.3390/metabo11050328 (PMC8161100; doi:10.3390/metabo11050328)
Supplement: Supplementary file 1 [file metabolites-11-00328-s001.zip › Supplementary materials/Table S7-12.xlsx]

## Sheet: Intro
This document shows metabolite lists detailing significantly rhythmic/gradient metabolites by sub-themes (see tabs) used in the main text (e.g. circadian, health status). Within each tab metabolite lists are ordered by publication (shown in chronological order left to right) and, if applicable, studied conditions e.g. during sleep deprivation, post sleep deprivation. Metabolite lists for Tables S…

## Sheet: TS7-Circadian (Blood-Saliva)
Metabolite lists pertaining to rhyhmicity under constant routine conditions, thus rhythms are observed in 'free-running' conditions and can be deemed endongenous and regulated by the SCN (Rhythms may be influenced by prolonged wakefulness). Rhythmic and linear metabolites identified by Grant et al (2018) not included as linear changes under constant routine (prolonged wakefulness) suggest the inf…														Saliva - Rhythmic Metabolites
Metabolites	Studies observed in							Dallmann et al (2012)	Kasukawa et al (2012)	Chua et al (2013)	Grant et al (2018)			Dallmann et al (2012)
10-heptadecenoate (17:1n7)	1 - Dallmann							10-heptadecenoate (17:1n7)	Cortisone	Triacylglycerols	4-Hydroxyphenylpyruvic acid			3-dehydrocarnitine
13-HODE + 9-HODE	1 - Dallmann							13-HODE + 9-HODE	Urocortisone-3-glucronide	TAG 48:3	5-Hydroxylysine			8-hydroxyoctanoate
1-eicosadienoylglycerophosphocholine	1 - Dallmann							1-eicosadienoylglycerophosphocholine	Pregnanolone sulfate-like metabolite	TAG 48:2	Citric acid			Ethanolamine
1-oleoylglycerol (1-monoolein)	1 - Dallmann							1-oleoylglycerol (1-monoolein)	(allo)Urocortisol-3-glucronide	TAG 48:1	Citrulline			3-methyl-2-oxobutyrate
1-palmitoylglycerophosphoinositol	1 - Dallmann							1-palmitoylglycerophosphoinositol	L-phenylalanine	TAG 48:0	D-Glucuronic acid			3-methyl-2-oxovalerate
21-hydroxypregnenolone disulfate	1 - Dallmann							21-hydroxypregnenolone disulfate	Tryptophan	TAG 50:4	dUMP			3-phenylpropionate (hydrocinnamate)
2-linoleoylglycerophosphoethanolamine	1 - Dallmann							2-linoleoylglycerophosphoethanolamine	L-leucine	TAG 50:3	Fumaric acid			4-hydroxyphenylacetate
2-oleoylglycerophosphoethanolamine	1 - Dallmann							2-oleoylglycerophosphoethanolamine		TAG 50:2	Glucose 6-phosphate			4-methyl-2-oxopentanoate
3-hydroxydecanoate	1 - Dallmann							3-hydroxydecanoate		TAG 51:2	Glycyl-glycine			arginine
4-hydroxyphenylpyruvate	1 - Dallmann							5alpha-androstan-3alpha,17beta-diol disulfate		TAG 52:6	Inosinic acid			creatine
5alpha-androstan-3alpha,17beta-diol disulfate	1 - Dallmann							arachidonate (20:4n6)		TAG 52:5	Isocitric acid			creatinine
alpha-hydroxyisocaproate	1 - Dallmann							cis-4-decenoyl carnitine		TAG 52:4	L-Arginine			histidine
arachidonate (20:4n6)	1 - Dallmann							cortisol		TAG 52:3	L-Asparagine			levulinate (4-oxovalerate)
cis-4-decenoyl carnitine	1 - Dallmann							cortisone		TAG 52:2	L-Homoserine			N-acetylmethionine
cortisol	1 - Dallmann							dihomo-linoleate (20:2n6)		TAG 52:1	L-Isoleucine			N-carbamoylaspartate
dihomo-linoleate (20:2n6)	1 - Dallmann							dihomo-linolenate (20:3n3 or n6)		TAG 52:0	L-Leucine			ornithine
dihomo-linolenate (20:3n3 or n6)	1 - Dallmann							docosadienoate (22:2n6)		TAG 53:3	L-Methionine			p-cresol sulfate
docosadienoate (22:2n6)	1 - Dallmann							docosahexaenoate (DHA; 22:6n3)		TAG 53:2	L-Tryptophan			serine
docosahexaenoate (DHA; 22:6n3)	1 - Dallmann							docosapentaenoate (n3 DPA; 22:5n3)		TAG 54:6	L-Tyrosine			tyrosine
docosapentaenoate (n3 DPA; 22:5n3)	1 - Dallmann							docosapentaenoate (n6 DPA; 22:5n6)		TAG 54:5	L-Valine			galactose
docosapentaenoate (n6 DPA; 22:5n6)	1 - Dallmann							eicosapentaenoate (EPA; 20:5n3)		TAG 54:4	Sucrose-6-phosphate			N-acetylgalactosamine
eicosapentaenoate (EPA; 20:5n3)	1 - Dallmann							glycerol		TAG 54:3				heptaethylene glycol
fructose	1 - Dallmann							laurylcarnitine		TAG 54:2				tetraethylene glycol
glutamate	1 - Dallmann							linoleate (18:2n6)		TAG 54:1				trihydroxybutane
glycerol	1 - Dallmann							linolenate [alpha or gamma; (18:3n3 or 6)]		TAG 56:3				cis-aconitate
glycerol 2-phosphate	1 - Dallmann							nonadecanoate (19:0)		TAG 60:0				citrate
Heme	1 - Dallmann							octanoylcarnitine		DAG 34:1				fumarate
hippurate	1 - Dallmann							palmitate (16:0)		DAG 36:3				succinate
lactate	1 - Dallmann							palmitoleate (16:1n7)		DAG 36:2				Glycyltyrosine
laurylcarnitine	1 - Dallmann							pregn steroid monosulfate		DAG 36:1				Pyroglutamylglutamine
linoleate (18:2n6)	1 - Dallmann							pregnen-diol disulfate		PC 32:2				threonylphenylalanine
linolenate [alpha or gamma; (18:3n3 or 6)]	1 - Dallmann							pregnenolone sulfate		PC 34:2p
nonadecanoate (19:0)	1 - Dallmann							4-hydroxyphenylpyruvate		PC 34:1p
octanoylcarnitine	1 - Dallmann							alpha-hydroxyisocaproate		PC 34:0p
palmitate (16:0)	1 - Dallmann							glutamate		PC 36:2p
palmitoleate (16:1n7)	1 - Dallmann							fructose		LysoPC 16:0
pregn steroid monosulfate	1 - Dallmann							lactate
pregnen-diol disulfate	1 - Dallmann							glycerol 2-phosphate
pregnenolone sulfate	1 - Dallmann							hippurate
pyridoxate	1 - Dallmann							Heme
(allo)Urocortisol-3-glucronide	1 - Kasukawa							pyridoxate
L-phenylalanine	1 - Kasukawa
Pregnanolone sulfate-like metabolite	1 - Kasukawa
Tryptophan	1 - Kasukawa
Urocortisone-3-glucronide	1 - Kasukawa
DAG 34:1	1 - Chua
DAG 36:1	1 - Chua
DAG 36:2	1 - Chua
DAG 36:3	1 - Chua
LysoPC 16:0	1 - Chua
PC 32:2	1 - Chua
PC 34:0p	1 - Chua
PC 34:1p	1 - Chua
PC 34:2p	1 - Chua
PC 36:2p	1 - Chua
TAG 48:0	1 - Chua
TAG 48:1	1 - Chua
TAG 48:2	1 - Chua
TAG 48:3	1 - Chua
TAG 50:2	1 - Chua
TAG 50:3	1 - Chua
TAG 50:4	1 - Chua
TAG 51:2	1 - Chua
TAG 52:0	1 - Chua
TAG 52:1	1 - Chua
TAG 52:2	1 - Chua
TAG 52:3	1 - Chua
TAG 52:4	1 - Chua
TAG 52:5	1 - Chua
TAG 52:6	1 - Chua
TAG 53:2	1 - Chua
TAG 53:3	1 - Chua
TAG 54:1	1 - Chua
TAG 54:2	1 - Chua
TAG 54:3	1 - Chua
TAG 54:4	1 - Chua
TAG 54:5	1 - Chua
TAG 54:6	1 - Chua
TAG 56:3	1 - Chua
TAG 60:0	1 - Chua
Triacylglycerols	1 - Chua
4-Hydroxyphenylpyruvic acid	1 - Grant
5-Hydroxylysine	1 - Grant
Citric acid	1 - Grant
Citrulline	1 - Grant
D-Glucuronic acid	1 - Grant
dUMP	1 - Grant
Fumaric acid	1 - Grant
Glucose 6-phosphate	1 - Grant
Glycyl-glycine	1 - Grant
Inosinic acid	1 - Grant
Isocitric acid	1 - Grant
L-Arginine	1 - Grant
L-Asparagine	1 - Grant
L-Homoserine	1 - Grant
L-Isoleucine	1 - Grant
L-Methionine	1 - Grant
L-Tryptophan	1 - Grant
L-Tyrosine	1 - Grant
L-Valine	1 - Grant
Sucrose-6-phosphate	1 - Grant
Cortisone	2 - Dallmann, Kasukawa
L-leucine	2 - Kasukawa, Grant

## Sheet: TS8-Sleep Deprivation (Bl-Ur)
Metabolite lists pertaining to rhyhmicity and/or gradient changes prior to, during, post sleep deprivation and combinations thereof. Full lists taken from papers (Investigating blood) shown on right (Column U-AK). Metabolites coloured coded based on paper they were observed in, in addition to written labels, Recovery sleep columns only refer to data from Honma et al (2020), and so are shown seper…																																							Urine
Rhythmic at baseline (Sleep/wake) only		Rhythmic during sleep deprivation only		Rhythmic at baseline and sleep deprivation		Increased during sleep deprivation		Decreased during sleep deprivation		Increased post sleep deprivation (Recovery sleep)	Decreased post sleep deprivation (Recovery sleep)	Returned to baseline post sleep deprivation (Recovery sleep)	Rhythmic during recovery sleep only	Rhythmic at baseline, recovery sleep	Rhythmic at sleep deprivation, recovery sleep	Rhythmic at baseline, sleep deprivation and recovery sleep				Davies et al (2014)			Chua (2015)			Grant et al (2018)				Honma et al (2020) - Cosinor Analysis results				Honma et al (2020) - MetaCycle					Giskeodegard et al (2015)
Metabolite Name	Studies observed in	Metabolite Name	Studies observed in	Metabolite Name	Studies observed in	Metabolite Name	Studies observed in	Metabolite Name	Studies observed in	Metabolite Name	Metabolite Name	Metabolite Name	Metabolite Name	Metabolite Name	Metabolite Name	Metabolite Name				Controlled Lab Conditions (48h - environmental light/dark, sleep, meals , 16:8 sleep/wake cycle vs 24 wakefulness)			Constant routine			Constant routine				‘Inpatient’ Standardized meals and meal times. Controlled light/dark cycle and activity/posture				‘Inpatient’ Standardized meals and meal times. Controlled light/dark cycle and activity/posture					Rhythmic at baseline (Sleep/wake) only	Rhythmic during sleep deprivation only	Rhythmic at baseline and sleep deprivation	Increased during sleep deprivation (Bold - also rhythmic)	Decreased during sleep deprivation
DMA	1 - Davies	Aspartate	1 - Davies	C0	1 - Davies	lysoPC a C14:0	1 - Davies	PC 34:1p	1 - Chua	Threonine	PC aa C36:5	histidine	Carnitine	Glycine	PC ae C30:0	Asparagine							Decreased during sleep deprivation	Increased during sleep deprivation		Rhythmic, Rhythmic & Linear (In bold)	Linear increase during prolonged wakefulness	Linear decrease during prolonged wakefulness		Rhythmic During 8:16H Sleep/wake cycle (Day 1)	Rhythmic During sleep deprivation (Day 2)	Rhythmic During 8:16H recovery Sleep/wake cycle (Day 3)		Rhythmic During 8:16H Sleep/wake cycle (Day 1)	Rhythmic During sleep deprivation (Day 2)	Rhythmic During 8:16H recovery Sleep/wake cycle (Day 3)				Phenylacetylglutamine	2-hydroxyisobutyrate	Taurine	Dimethylamine
C10	1 - Davies	Tyrosine	1 - Davies	C14	1 - Davies	lysoPC a C17:0	1 - Davies	PC 34:2p	1 - Chua		PC ae C42:2	lysine	PC ae C30:2	Kynurenine	PC ae C34:0	Glutamate				Total rhythmic N=124, clear (N=78) rhythmic on day 1 + 2 orange (N=31) day 1 only, blue (N=15) day 2 only)	Higher during Sleep deprivation (light grey - also rhythmic on at least one day)									Asparagine	Asparagine	Asparagine				Asparagine				Acetate	TMAO	Formate	4-DTA
C10:1	1 - Davies	C3	1 - Davies	C14:2	1 - Davies	PC aa C28:1	1 - Davies	PC 36:2p	1 - Chua				PC ae C38:2	PC aa C34:4	PC ae C36:2	Valerylcarnitine				Plasma	Plasma		Plasma			Plasma				Glutamate	Glutamate	Glutamate		Glutamate							Hippurate	Citrate	Creatinine
C10:2	1 - Davies	C5	1 - Davies	C16	1 - Davies	PC aa C30:0	1 - Davies	TAG 50:1	1 - Chua			citrulline	SM C26:1	PC aa C42:1	PC ae C40:2	SDMA				Glutamate	lysoPC a C14:0		PC 34:1p	LysoPC 16:1		2-Methylcitric acid	2-Methylcitric acid	cis-Aconitic acid		Glycine		Glycine		Glycine							Xylose	3-indoxyl sulfate	Ascorbate
C12	1 - Davies	lysoPC a C14:0	1 - Davies	C16:1=OH	1 - Davies	PC aa C32:0	1 - Davies	cis-Aconitic acid	1 - Grant				Threonine	PC aa C42:4	PC ae C42:4	t4-OH-Pro				Isoleucine	lysoPC a C17:0		PC 34:2p	TAG 48:3		4-Hydroxyphenylpyruvic acid	L-Proline	L-Lysine				Threonine		SDMA	SDMA						Trigonelline	Carnitine	2-hydroxyisobutyrate
C12-DC	1 - Davies	PC aa C32:0	1 - Davies	C16:2-OH	1 - Davies	PC aa C32:1	1 - Davies	L-Lysine	1 - Grant			carnitine	Tryptophan	PC ae C36:0	PC ae C44:3	lysoPC a C16:0				Ornithine	PC aa C28:1		PC 36:2p	TAG 56:3		5-Hydroxylysine	L-Threonine	Uridine				Tryptophan		t4-OH-Pro	t4-OH-Pro	t4-OH-Pro						3-hydroxyisobutyrate	Allantoin
C14:1	1 - Davies	PC aa C32:1	1 - Davies	C16-OH	1 - Davies	PC ae C32:1	1 - Davies	Uridine	1 - Grant			SDMA		SM C20:2	SM (OH) C16:1	lysoPC a C16:1				Proline	PC aa C30:0		TAG 50:1	SM 18:1/24:1		Citric acid	Ornithine	Pantothenic acid				Carnitine		lysoPC a C16:0	lysoPC a C16:0	lysoPC a C16:0						TMAO	4-DEA
C14:1-OH	1 - Davies	PC aa C34:2	1 - Davies	C18:1	1 - Davies	PC ae C36:0	1 - Davies	Pantothenic acid	1 - Grant						SM C16:1	lysoPC a C17:0				Valine	PC aa C32:0			PC 34:2		Citrulline	L-Phenylalanine			Valerylcarnitine	Valerylcarnitine	Valerylcarnitine		lysoPC a C16:1	lysoPC a C16:1	lysoPC a C16:1						Acetate	4-hydroxyphenylacetate
C14:2-OH	1 - Davies	PC aa C34:3	1 - Davies	C18:2	1 - Davies	PC ae C36:2	1 - Davies									lysoPC a C18:0				Alpha-AAA	PC aa C32:1			DAG 36:2		Cysteic acid	Cysteic acid			alpha-AAA	alpha-AAA			lysoPC a C17:0	lysoPC a C17:0
C18	1 - Davies	PC aa C36:0	1 - Davies	C3:1	1 - Davies	PC ae C38:2	1 - Davies									lysoPC a C18:1				SDMA	PC ae C32:1			PC 38:3		D-Glucuronic acid	Phosphoric acid			Kynurenine		Kynurenine		lysoPC a C18:0	lysoPC a C18:0
C2	1 - Davies	PC aa C36:2	1 - Davies	C4	1 - Davies	PC ae C38:3	1 - Davies									lysoPC a C18:2				Kynurenine	PC ae C36:0			TAG 48:2		dUMP				SDMA	SDMA	SDMA		lysoPC a C18:1	lysoPC a C18:1	lysoPC a C18:1
C5-OH (C3-DC-M)	1 - Davies	PC aa C36:3	1 - Davies	Glutamate	1 - Davies	PC ae C38:4	1 - Davies									lysoPC a C20:3				Sarcosine	PC ae C36:2			TAG 54:3		Fumaric acid				t4-OH-Pro	t4-OH-Pro	t4-OH-Pro		lysoPC a C18:2	lysoPC a C18:2	lysoPC a C18:2
C7-DC	1 - Davies	PC aa C36:5	1 - Davies	Isoleucine	1 - Davies	PC ae C40:2	1 - Davies									lysoPC a C20:4				C0	PC ae C38:2			TAG 54:4		Glucose 6-phosphate					Taurine			lysoPC a C20:3	lysoPC a C20:3	lysoPC a C20:3
C8	1 - Davies	PC ae C36:2	1 - Davies	Kynurenine	1 - Davies	PC ae C40:3	1 - Davies									PC aa C28:1				C3:1	PC ae C38:3			TAG 52:5		Glycyl-glycine				lysoPC a C16:0	lysoPC a C16:0	lysoPC a C16:0		lysoPC a C20:4	lysoPC a C20:4	lysoPC a C20:4
C9	1 - Davies	PC ae C38:2	1 - Davies	lysoPC a C16:0	1 - Davies	PC ae C40:5	1 - Davies									PC aa C30:0				C4	PC ae C38:4			TAG 50:4		Inosinic acid				lysoPC a C16:1	lysoPC a C16:1	lysoPC a C16:1			PC aa C30:0
Hexose	1 - Davies	PC aa C32:3	1 - Honma	lysoPC a C17:0	1 - Davies	PC ae C40:6	1 - Davies									PC aa C32:1				C14	PC ae C40:2			TAG 54:7		Isocitric acid				lysoPC a C17:0	lysoPC a C17:0	lysoPC a C17:0		PC aa C32:1	PC aa C32:1	PC aa C32:1
lysoPC a C24:0	1 - Davies	PC aa C38:6	1 - Honma	lysoPC a C18:0	1 - Davies	SM (OH) C14:1	1 - Davies									PC aa C36:1				C14:2	PC ae C40:3			PC 36:3		L-Arginine				lysoPC a C18:0	lysoPC a C18:0	lysoPC a C18:0		PC aa C34:3
PC aa C24:0	1 - Davies	PC ae C44:4	1 - Honma	lysoPC a C18:2	1 - Davies	SM (OH) C16:1	1 - Davies									PC aa C36:5				C16	PC ae C40:5			PC 40:7		L-Asparagine				lysoPC a C18:1	lysoPC a C18:1	lysoPC a C18:1		PC aa C36:1
PC aa C28:1	1 - Davies	SM (OH) C24:1	1 - Honma	Ornithine	1 - Davies	SM (OH) C22:2	1 - Davies									PC aa C38:0				C16-OH	PC ae C40:6			PI 36:3		L-Homoserine				lysoPC a C18:2	lysoPC a C18:2	lysoPC a C18:2		PC aa C36:5
PC ae C30:2	1 - Davies	Taurine	1 - Honma	PC aa C30:0	1 - Davies	SM C20:2	1 - Davies									PC aa C38:3				C16:1=OH	SM (OH) C14:1			TAG 52:6		L-Isoleucine				lysoPC a C20:3	lysoPC a C20:3	lysoPC a C20:3		PC aa C36:6
PC ae C32:1	1 - Davies	2-Methylcitric acid	1 - Grant	PC aa C36:4	1 - Davies	Taurine	1 - Davies									PC aa C38:4				C16:2-OH	SM (OH) C16:1			TAG 54:6		L-Leucine				lysoPC a C20:4	lysoPC a C20:4	lysoPC a C20:4		PC aa C38:5
PC ae C36:0	1 - Davies	4-Hydroxyphenylpyruvic acid	1 - Grant	PC aa C38:0	1 - Davies	lysoPC a C16:1	1 - Davies									PC aa C38:5				C18:1	SM (OH) C22:2			TAG 54:5		L-Lysine				lysoPC a C26:0				PC aa C40:5
PC ae C40:2	1 - Davies	5-Hydroxylysine	1 - Grant	PC aa C38:3	1 - Davies	PC aa C36:6	1 - Davies									PC aa C40:3				C18:2	SM C20:2			PC 32:2		L-Methionine				lysoPC a C28:1				PC aa C40:6
PC ae C42:2	1 - Davies	Citric acid	1 - Grant	PC aa C38:4	1 - Davies	Decanoylcarnitine (C10 )	1 - Davies									PC aa C40:4				lysoPC a C16:0	Taurine			PC 34:3		L-Phenylalanine				PC aa C28:1	PC aa C28:1	PC aa C28:1		PC ae C34:1
PC ae C44:3	1 - Davies	Citrulline	1 - Grant	PC aa C38:5	1 - Davies	Dodecanoylcarnitine (C12)	1 - Davies									PC aa C40:5				lysoPC a C17:0	lysoPC a C16:1					L-Threonine				PC aa C30:0	PC aa C30:0	PC aa C30:0		PC ae C34:3	PC ae C34:3	PC ae C34:3
SM (OH) C14:1	1 - Davies	Cysteic acid	1 - Grant	PC aa C38:6	1 - Davies	Hydroxyhexadecanoylcarnitine	1 - Davies									PC aa C40:6				lysoPC a C18:0	PC aa C36:6					L-Tryptophan				PC aa C32:1	PC aa C32:1	PC aa C32:1		PC ae C36:4
Taurine	1 - Davies	D-Glucuronic acid	1 - Grant	PC aa C40:1	1 - Davies	lysoPC a C18:1	1 - Davies									PC aa C42:0				lysoPC a C18:2	Decanoylcarnitine (C10 )					L-Tyrosine					PC aa C32:3
PC aa C34:3	1 - Honma	dUMP	1 - Grant	PC aa C40:2	1 - Davies	Nonaylcarnitine (C9)	1 - Davies									PC aa C42:5				PC aa C30:0	Dodecanoylcarnitine (C12)					L-Valine				PC aa C34:3
PC aa C36:0	1 - Honma	Fumaric acid	1 - Grant	PC aa C40:3	1 - Davies	Octanoylcarnitine (C8)	1 - Davies									PC aa C42:6				PC aa C36:4	Hydroxyhexadecanoylcarnitine					Ornithine				PC aa C34:4		PC aa C34:4
PC aa C36:6	1 - Honma	Glucose 6-phosphate	1 - Grant	PC aa C40:4	1 - Davies	PC aa C32:3	1 - Davies									PC ae C32:1				PC aa C38:0	lysoPC a C18:1					Pantothenic acid				PC aa C36:0
PC aa C40:2	1 - Honma	Glycyl-glycine	1 - Grant	PC aa C40:5	1 - Davies	PC aa C34:4	1 - Davies									PC ae C32:2				PC aa C38:3	Nonaylcarnitine (C9)					Sucrose-6-phosphate				PC aa C36:1	PC aa C36:1	PC aa C36:1
lysoPC a C26:0	2- Davies, Honma	Inosinic acid	1 - Grant	PC aa C40:6	1 - Davies	PC ae C30:0	1 - Davies									PC ae C34:1				PC aa C38:4	Octanoylcarnitine (C8)									PC aa C36:5	PC aa C36:5	PC aa C36:5
lysoPC a C28:1	2- Davies, Honma	Isocitric acid	1 - Grant	PC aa C42:0	1 - Davies	PC ae C34:0	1 - Davies									PC ae C34:2				PC aa C38:5	PC aa C32:3									PC aa C36:6
PC ae C42:1	2- Davies, Honma	L-Arginine	1 - Grant	PC aa C42:1	1 - Davies	PC ae C34:1	1 - Davies									PC ae C34:3				PC aa C38:6	PC aa C34:4									PC aa C38:0	PC aa C38:0	PC aa C38:0
PC ae C42:3	2- Davies, Honma	L-Asparagine	1 - Grant	PC aa C42:4	1 - Davies	PC ae C36:1	1 - Davies									PC ae C36:1				PC aa C40:1	PC ae C30:0									PC aa C38:3	PC aa C38:3	PC aa C38:3
		L-Homoserine	1 - Grant	PC aa C42:5	1 - Davies	Pimelylcarnitine (C7SDC)	1 - Davies									PC ae C36:3				PC aa C40:2	PC ae C34:0									PC aa C38:4	PC aa C38:4	PC aa C38:4
		L-Isoleucine	1 - Grant	PC aa C42:6	1 - Davies	Propionylcarnitine (C3)	1 - Davies									PC ae C36:4				PC aa C40:3	PC ae C34:1									PC aa C38:5	PC aa C38:5	PC aa C38:5
		L-Leucine	1 - Grant	PC ae C32:2	1 - Davies	Serotonin	1 - Davies									PC ae C36:5				PC aa C40:4	PC ae C36:1										PC aa C38:6
		L-Lysine	1 - Grant	PC ae C34:2	1 - Davies	Tetradecanoylcarnitine (C14)	1 - Davies									PC ae C38:0				PC aa C40:5	Pimelylcarnitine (C7SDC)									PC aa C40:2
		L-Methionine	1 - Grant	PC ae C34:3	1 - Davies	Tryptophan	1 - Davies									PC ae C38:3				PC aa C40:6	Propionylcarnitine (C3)									PC aa C40:3	PC aa C40:3	PC aa C40:3
		L-Phenylalanine	1 - Grant	PC ae C36:3	1 - Davies	Valerylcarnitine (C5)	1 - Davies									PC ae C38:4				PC aa C42:0	Serotonin									PC aa C40:4	PC aa C40:4	PC aa C40:4
		L-Threonine	1 - Grant	PC ae C36:4	1 - Davies	LysoPC 16:1	1 - Chua									PC ae C38:5				PC aa C42:1	Tetradecanoylcarnitine (C14)									PC aa C40:5	PC aa C40:5	PC aa C40:5
		L-Tryptophan	1 - Grant	PC ae C36:5	1 - Davies	TAG 48:3	1 - Chua									PC ae C38:6				PC aa C42:2	Tryptophan									PC aa C40:6	PC aa C40:6	PC aa C40:6
		L-Tyrosine	1 - Grant	PC ae C38:0	1 - Davies	TAG 56:3	1 - Chua									PC ae C40:3				PC aa C42:4	Valerylcarnitine (C5)									PC aa C42:0	PC aa C42:0	PC aa C42:0
		L-Valine	1 - Grant	PC ae C38:3	1 - Davies	SM 18:1/24:1	1 - Chua									PC ae C40:4				PC aa C42:5										PC aa C42:1		PC aa C42:1
		Ornithine	1 - Grant	PC ae C38:4	1 - Davies	PC 34:2	1 - Chua									PC ae C40:5				PC aa C42:6										PC aa C42:2	PC aa C42:2
		Pantothenic acid	1 - Grant	PC ae C38:5	1 - Davies	DAG 36:2	1 - Chua									PC ae C40:6				PC ae C32:2										PC aa C42:4		PC aa C42:4
		Sucrose-6-phosphate	1 - Grant	PC ae C38:6	1 - Davies	PC 38:3	1 - Chua									PC ae C42:2				PC ae C34:2										PC aa C42:5	PC aa C42:5	PC aa C42:5
				PC ae C40:3	1 - Davies	TAG 48:2	1 - Chua									PC ae C42:5				PC ae C34:3										PC aa C42:6	PC aa C42:6	PC aa C42:6
				PC ae C40:4	1 - Davies	TAG 54:3	1 - Chua									PC ae C44:5				PC ae C36:3											PC ae C30:0	PC ae C30:0
				PC ae C40:5	1 - Davies	TAG 54:4	1 - Chua									PC ae C44:6				PC ae C36:4												PC ae C30:2
				PC ae C40:6	1 - Davies	TAG 52:5	1 - Chua									SM (OH) C14:1				PC ae C36:5										PC ae C32:1	PC ae C32:1	PC ae C32:1
				PC ae C42:0	1 - Davies	TAG 50:4	1 - Chua									SM (OH) C22:2				PC ae C38:0										PC ae C32:2	PC ae C32:2	PC ae C32:2
				PC ae C42:4	1 - Davies	TAG 54:7	1 - Chua									SM C16:0				PC ae C38:3											PC ae C34:0	PC ae C34:0
				PC ae C42:5	1 - Davies	PC 36:3	1 - Chua									SM C18:0				PC ae C38:4										PC ae C34:1	PC ae C34:1	PC ae C34:1
				PC ae C44:4	1 - Davies	PC 40:7	1 - Chua									SM C18:1				PC ae C38:5										PC ae C34:2	PC ae C34:2	PC ae C34:2
				PC ae C44:5	1 - Davies	PI 36:3	1 - Chua									SM C24:0				PC ae C38:6										PC ae C34:3	PC ae C34:3	PC ae C34:3
				PC ae C44:6	1 - Davies	TAG 52:6	1 - Chua									SM C24:1				PC ae C40:1										PC ae C36:0		PC ae C36:0
				Proline	1 - Davies	TAG 54:6	1 - Chua													PC ae C40:3										PC ae C36:1	PC ae C36:1	PC ae C36:1
				Sarcosine	1 - Davies	TAG 54:5	1 - Chua													PC ae C40:4											PC ae C36:2	PC ae C36:2
				SDMA	1 - Davies	PC 32:2	1 - Chua													PC ae C40:5										PC ae C36:3	PC ae C36:3	PC ae C36:3
				SM (OH) C16:1	1 - Davies	PC 34:3	1 - Chua													PC ae C40:6										PC ae C36:4	PC ae C36:4	PC ae C36:4
				SM (OH) C22:2	1 - Davies	2-Methylcitric acid	1 - Grant													PC ae C42:0										PC ae C36:5	PC ae C36:5	PC ae C36:5
				SM C16:0	1 - Davies	L-Proline	1 - Grant													PC ae C42:4										PC ae C38:0	PC ae C38:0	PC ae C38:0
				SM C16:1	1 - Davies	L-Threonine	1 - Grant													PC ae C42:5												PC ae C38:2
				SM C18:0	1 - Davies	Ornithine	1 - Grant													PC ae C44:4										PC ae C38:3	PC ae C38:3	PC ae C38:3
				SM C18:1	1 - Davies	L-Phenylalanine	1 - Grant													PC ae C44:5										PC ae C38:4	PC ae C38:4	PC ae C38:4
				SM C20:2	1 - Davies	Cysteic acid	1 - Grant													PC ae C44:6										PC ae C38:5	PC ae C38:5	PC ae C38:5
				SM C24:0	1 - Davies	Phosphoric acid	1 - Grant													SM C16:0										PC ae C38:6	PC ae C38:6	PC ae C38:6
				SM C24:1	1 - Davies															SM C16:1										PC ae C40:1	PC ae C40:1
				SM C26:1	1 - Davies															SM (OH) C16:1											PC ae C40:2	PC ae C40:2
				SM(OH) C24:1	1 - Davies															SM C18:0										PC ae C40:3	PC ae C40:3	PC ae C40:3
				Valine	1 - Davies															SM C18:1										PC ae C40:4	PC ae C40:4	PC ae C40:4
				Alpha-AAA	2- Davies, Honma															SM C20:2										PC ae C40:5	PC ae C40:5	PC ae C40:5
				PC aa C42:2	2- Davies, Honma															SM (OH) C22:1										PC ae C40:6	PC ae C40:6	PC ae C40:6
				PC ae C40:1	2- Davies, Honma															SM (OH) C22:2										PC ae C42:1
				SM (OH) C22:1	2- Davies, Honma															SM C24:0										PC ae C42:2	PC ae C42:2	PC ae C42:2
				SM C26:0	2- Davies, Honma															SM C24:1										PC ae C42:3
																				SM(OH) C24:1											PC ae C42:4	PC ae C42:4
																				SM C26:0										PC ae C42:5	PC ae C42:5	PC ae C42:5
																				SM C26:1											PC ae C44:3	PC ae C44:3
																				DMA											PC ae C44:4
																				Taurine										PC ae C44:5	PC ae C44:5	PC ae C44:5
																				C2										PC ae C44:6	PC ae C44:6	PC ae C44:6
																				C5-OH (C3-DC-M)										SM (OH) C14:1	SM (OH) C14:1	SM (OH) C14:1
																				C7-DC											SM (OH) C16:1	SM (OH) C16:1
																				C8										SM (OH) C22:1	SM (OH) C22:1
																				C9										SM (OH) C22:2	SM (OH) C22:2	SM (OH) C22:2
																				C10											SM (OH) C24:1
																				C10:1										SM C16:0	SM C16:0	SM C16:0
																				C10:2											SM C16:1	SM C16:1
																				C12										SM C18:0	SM C18:0	SM C18:0
																				C12-DC										SM C18:1	SM C18:1	SM C18:1
																				C14:1										SM C20:2		SM C20:2
																				C14:1-OH										SM C24:0	SM C24:0	SM C24:0
																				C14:2-OH										SM C24:1	SM C24:1	SM C24:1
																				C18										SM C26:0	SM C26:0
																				Hexose												SM C26:1
																				lysoPC a C24:0
																				lysoPC a C26:0
																				lysoPC a C28:1
																				PC aa C24:0
																				PC aa C28:1
																				PC ae C30:2
																				PC ae C32:1
																				PC ae C36:0
																				PC ae C40:2
																				PC ae C42:1
																				PC ae C42:2
																				PC ae C42:3
																				PC ae C44:3
																				SM (OH) C14:1
																				Aspartate
																				Tyrosine
																				C3
																				C5
																				lysoPC a C14:0
																				PC aa C32:0
																				PC aa C32:1
																				PC aa C34:2
																				PC aa C34:3
																				PC aa C36:0
																				PC aa C36:2
																				PC aa C36:3
																				PC aa C36:5
																				PC ae C36:2
																				PC ae C38:2

## Sheet: TS9-Sex Differences (Blood)
Metabolite lists pertaining to rhyhmicity prior to and/or gradient changes during sleep deprivation comparing sex dependent differences. Data is dervied from Honma et al (2020) who in turn reanalyzed and incorporated the male dataset from Davies et al (2014). * Metabolties quantified only in males, ** metabolites quantified only in females										Full list of Significant metabolites
Rhythmic metabolites on day 1 (baseline) and day 2 (sleep deprivation)			Rhythmic metabolites on day 2 (sleep deprivation) only			Rhythmic metabolites exclusively observed for either comparison				Male		Female
Rhythmic for both males and females	Rhythmic in males only	Rhythmic in females only	Rhythmic for both males and females	Rhythmic in males only	Rhythmic in females only	Males	Females			1	alpha-AAA	1	alpha-AAA
Glutamate	Ornithine	Asparagine		Hydroxyhexadecanoylcarnitine*	PC aa C36:5	Butyrylcarnitine	Asparagine			2	Butyrylcarnitine	2	Asparagine
alpha-AAA	Proline	t4-OH-Pro**		Tetradecanoylcarnitine*	Glutamate	Hexadecanoylcarnitine	Citrulline			3	Carnitine	3	Carnitine
SDMA	Kynurenine	lysoPC a C16:1		SM (OH) C22:2	Lysine	Hydroxyhexadecanoylcarnitine*	Glutamate			4	Glutamate	4	Citrulline
lysoPC a C16:0	Sarcosine*	lysoPC a C18:1		lysoPC a C18:1	PC aa C40:3	Kynurenine	Histidine			5	Hexadecanoylcarnitine	5	Glutamate
lysoPC a C18:0	Carnitine	lysoPC a C20:3		Octanoylcarnitine*	lysoPC a C18:0	lysoPC a C17:0	Lysine			6	Hydroxyhexadecanoylcarnitine*	6	Histidine
lysoPC a C18:2	Butyrylcarnitine	lysoPC a C20:4		PC ae C40:5	Carnitine	M (OH) C14:1	lysoPC a C18:0			7	Kynurenine	7	Lysine
PC aa C30:0	Hexadecanoylcarnitine	PC aa C28:1		PC aa C32:3	SDMA	Octadecadienylcarnitine	lysoPC a C20:3			8	lysoPC a C16:0	8	lysoPC a C16:0
PC aa C36:1	Octadecanoylcarnitine	PC aa C32:1		PC ae C40:3	PC aa C38:5	Octadecanoylcarnitine	lysoPC a C20:4			9	lysoPC a C16:1	9	lysoPC a C16:1
PC aa C36:5	Octadecenoylcarnitine	PC aa C36:6		PC ae C40:6	PC ae C36:3	Octadecenoylcarnitine	PC aa C32:1			10	lysoPC a C17:0	10	lysoPC a C18:0
PC aa C38:0	Octadecadienylcarnitine	PC ae C36:1		M (OH) C14:1	PC ae C42:3	Octanoylcarnitine*	PC aa C36:5			11	lysoPC a C18:0	11	lysoPC a C18:1
PC aa C38:3	PC aa C36:3	PC ae C38:3		SM C20:2	Citrulline	Ornithine	PC aa C38:0			12	lysoPC a C18:1	12	lysoPC a C18:2
PC aa C38:4	PC aa C42:1	SM (OH) C14:1		PC aa C28:1	PC aa C40:5	PC aa C30:0	PC aa C38:5			13	lysoPC a C18:2	13	lysoPC a C20:3
PC aa C38:5	PC ae C38:2	SM (OH) C22:1		PC ae C38:4	Histidine	PC aa C32:0	PC aa C40:3			14	M (OH) C14:1	14	lysoPC a C20:4
PC aa C40:3	PC ae C42:4			PC aa C32:0	PC aa C38:0	PC aa C32:1	PC aa C40:5			15	Octadecadienylcarnitine	15	PC aa C28:1
PC aa C40:4	PC ae C44:4			Propionylcarnitine	Threonine	PC aa C32:3	PC ae C36:3			16	Octadecanoylcarnitine	16	PC aa C30:0
PC aa C40:5				PC aa C36:6		PC aa C34:4	PC ae C42:3			17	Octadecenoylcarnitine	17	PC aa C32:1
PC aa C40:6				Valerylcarnitine		PC aa C36:3	SDMA			18	Octanoylcarnitine*	18	PC aa C36:1
PC aa C42:0				PC ae C32:1		PC aa C42:1	SM (OH) C14:1			19	Ornithine	19	PC aa C36:5
PC aa C42:2				SM (OH) C16:1		PC ae C30:0	SM (OH) C22:1			20	PC aa C28:1	20	PC aa C36:6
PC aa C42:5				PC ae C36:0		PC ae C32:1	t4-OH-Pro**			21	PC aa C30:0	21	PC aa C38:0
PC ae C32:2				PC ae C40:2		PC ae C34:0	Threonine			22	PC aa C32:0	22	PC aa C38:3
PC ae C34:3				lysoPC a C16:1		PC ae C34:1				23	PC aa C32:1	23	PC aa C38:4
PC ae C36:4				PC aa C34:4		PC ae C36:0				24	PC aa C32:3	24	PC aa C38:5
PC ae C38:0				PC ae C36:2		PC ae C36:2				25	PC aa C34:4	25	PC aa C40:3
PC ae C38:5				Tryptophan		PC ae C38:2				26	PC aa C36:1	26	PC aa C40:4
PC ae C38:6				PC ae C38:2		PC ae C38:4				27	PC aa C36:3	27	PC aa C40:5
PC ae C40:3				PC ae C34:1		PC ae C40:2				28	PC aa C36:5	28	PC aa C40:6
PC ae C40:4				PC ae C38:3		PC ae C40:3				29	PC aa C36:6	29	PC aa C42:0
PC ae C40:5				Taurine		PC ae C40:5				30	PC aa C38:0	30	PC aa C42:2
PC ae C40:6				Pimelylcarnitine*		PC ae C40:6				31	PC aa C38:3	31	PC aa C42:5
PC ae C44:5				PC ae C36:1		PC ae C42:4				32	PC aa C38:4	32	PC ae C32:2
PC ae C44:6				lysoPC a C17:0		PC ae C44:4				33	PC aa C38:5	33	PC ae C34:3
				PC aa C32:1		Pimelylcarnitine*				34	PC aa C40:3	34	PC ae C36:1
				PC aa C30:0		Proline				35	PC aa C40:4	35	PC ae C36:3
				PC ae C30:0		Propionylcarnitine				36	PC aa C40:5	36	PC ae C36:4
				PC ae C34:0		Sarcosine*				37	PC aa C40:6	37	PC ae C38:0
				Serotonin*		Serotonin*				38	PC aa C42:0	38	PC ae C38:3
						SM (OH) C16:1				39	PC aa C42:1	39	PC ae C38:5
						SM (OH) C22:2				40	PC aa C42:2	40	PC ae C38:6
						SM C20:2				41	PC aa C42:5	41	PC ae C40:3
						Taurine				42	PC ae C30:0	42	PC ae C40:4
						Tetradecanoylcarnitine*				43	PC ae C32:1	43	PC ae C40:5
						Tryptophan				44	PC ae C32:2	44	PC ae C40:6
						Valerylcarnitine				45	PC ae C34:0	45	PC ae C42:3
										46	PC ae C34:1	46	PC ae C44:5
										47	PC ae C34:3	47	PC ae C44:6
										48	PC ae C36:0	48	SDMA
										49	PC ae C36:1	49	SM (OH) C14:1
										50	PC ae C36:2	50	SM (OH) C22:1
										51	PC ae C36:4	51	t4-OH-Pro**
										52	PC ae C38:0	52	Threonine
										53	PC ae C38:2
										54	PC ae C38:3
										55	PC ae C38:4
										56	PC ae C38:5
										57	PC ae C38:6
										58	PC ae C40:2
										59	PC ae C40:3
										60	PC ae C40:4
										61	PC ae C40:5
										62	PC ae C40:6
										63	PC ae C42:4
										64	PC ae C44:4
										65	PC ae C44:5
										66	PC ae C44:6
										67	Pimelylcarnitine*
										68	Proline
										69	Propionylcarnitine
										70	Sarcosine*
										71	SDMA
										72	Serotonin*
										73	SM (OH) C16:1
										74	SM (OH) C22:2
										75	SM C20:2
										76	Taurine
										77	Tetradecanoylcarnitine*
										78	Tryptophan
										79	Valerylcarnitine

## Sheet: TS10-Shift work (Blood)
Metabolite lists pertaining to rhyhmicity following simulated day or night shift routine (Skene, Left) or during baseline/simulated night shift routine (Kervezee, Right). Common metabolties of the control groups and nightshift groups are shown, please note however, that measurements between studies were taken at different times, relative to completing shift work, and under different conditions (C…									Urine - Significantly different metabolites in premenopausal females, day vs night shift workers
Skene et al (2018)			Kervezee et al (2018)			Common metabolites between studies (at baseline/dayshift)	Common metabolites between studies (during/after night shift)		Papantoniou et al (2015)
Rhythmic Following Day Shift Condition	Rhythmic Following night Shift Condition		Rhythmic at baseline	Rythmic during night shift		Alanine	Arginine		Premenopausal women Day vs night workers for significant change in abundance
(Light blue - common to both conditions, Bold Sig. diff amplitude between conditions)			Common metabolites across groups highlighted in orange			Arginine	C2		Urine
Plasma			Plasma			Isoleucine	Citrulline		Pregnanediol
Arginine	Arginine		Acetyl.Ornithine	Acetyl.Ornithine		Leucine	Isoleucine		Pregnanetriol
C18:1	C18:1		Alanine	Alanine		Ornithine	Ornithine		16-Androstenol
Isoleucine	Isoleucine		Arginine	Arginine		Phenylalanine	Proline		Testosterone
LysoPC a C18:1	LysoPC a C18:1		Asparagine	Asparagine		Proline	Tryptophan		3a,5a-Androstanediol
LysoPC a C18:2	LysoPC a C18:2		beta.Hydroxybutyric.acid	beta.Hydroxybutyric.acid		Sarcosine
LysoPC a C26:0	LysoPC a C26:0		C10	C10		Threonine
Ornithine	Ornithine		C10.2	C10.2
PC aa C30:0	PC aa C30:0		C14.2	C14.2
PC aa C32:0	PC aa C32:0		C16.1	C16.1
PC aa C32:1	PC aa C32:1		C2	C2
PC aa C32:3	PC aa C32:3		C5	C5
PC aa C34:4	PC aa C34:4		C6	C6
PC aa C36:0	PC aa C36:0		C8	C8
PC aa C36:5	PC aa C36:5		Citrulline	Citrulline
PC aa C36:6	PC aa C36:6		Glucose	Glucose
PC aa C40:2	PC aa C40:2		Hippuric.acid	Hippuric.acid
PC aa C42:2	PC aa C42:2		Indole.acetic.acid	Indole.acetic.acid
PC ae C30:0	PC ae C30:0		Isoleucine	Isoleucine
PC ae C34:0	PC ae C34:0		Lactic.acid	Lactic.acid
PC ae C34:3	PC ae C34:3		Leucine	Leucine
Proline	Proline		LYSOC14.0	LYSOC14.0
Sarcosine	Sarcosine		LYSOC18.2	LYSOC18.2
Serotonin	Serotonin		Methionine.Sulfoxide	Methionine.Sulfoxide
SM C18:0	SM C18:0		Methylhistidine	Methylhistidine
SM C18:1	SM C18:1		Methylmalonic.acid	Methylmalonic.acid
SM C20:2	SM C20:2		Ornithine	Ornithine
Taurine	Taurine		Phenylalanine	Phenylalanine
Alanine	C14:2		Proline	Proline
Glutamine	C2		Pyruvic.acid	Pyruvic.acid
Histidine	C3-DC (C4-OH)		TMAO	TMAO
Kynurenine	C5-DC (C6-OH)		Tryptophan	Tryptophan
Leucine	C9		Tyrosine	Tyrosine
Lysine	Citrulline		alpha.Aminoadipic.acid	alpha.Ketoglutaric.acid
LysoPC a C16:1	Glutamic acid		C4.1	Betaine
LysoPC a C17:0	PC aa C34:1		Citric.acid	Butyric.acid
LysoPC a C18:0	PC aa C34:2		Creatine	C12
LysoPC a C20:3	PC aa C34:3		LYSOC16.0	C12.1
LysoPC a C20:4	PC aa C36:2		LYSOC17.0	C14.1
LysoPC a C26:1	PC aa C36:4		LYSOC18.0	C16
LysoPC a C28:0	PC aa C38:4		LYSOC18.1	C16.2
PC aa C24:0	PC aa C40:5		LYSOC20.3	C18
PC ae C34:2	PC ae C34:1		LYSOC20.4	C18.1
PC ae C36:0	PC ae C36:4		Methionine	C18.2
PC ae C38:2	PC ae C36:5		PC38.6AA	C3
Phenylalanine	PC ae C44:3		PC40.2AA	C4
Threonine	Tryptophan		PC40.6AE	C4OH
			Sarcosine	Glutamic.acid
			Threonine	Glutamine
			trans.OH.Proline	Glycine
			Valine	His
			X14.1SMOH	PC32.2AA
				Serine
				Spermidine

## Sheet: TS11-Health (Blood-Breath)
Metabolite lists pertaining to common and unique aspects of metabolite profiles and rhyhmicity of specific phenotypes associated with Body mass/T2DM (Isherwood, Left), 'good sleepers' vs insomniacs (Gehrman, Middle), and non-asthmatics vs asthmatics (Wilkinson, Right)
Isherwood (2017)				Gehrman et al (2018)				Wilkinson et al (2019)
Lean	OW/OB	T2DM		Healthy	Insomniac	Combined		Diurnal Variation. Standardised meals and feeding schedule. Maintained habitual bedtime.
Light blue common to all, light orange common to non diabetic groups (Lean OW/OB), light grey common to overweight groups (OW/OB & T2DM), colourless unique to group.				Colourless unique to group.				Healthy	Asthmatic	Combined
Plasma				Serum				Breath
citrulline	citrulline	citrulline		2-Hydroxybutyrate	Acetate	3-Hydroxybutyrate		Xylene	Acetone	Chloro-benzene
AC-C2	AC-C2	AC-C2		Citrate	Creatine	3-Hydroxyisobutyrate		Isobutylacetate	Isoprene	Isoprene
SDMA	SDMA	SDMA		Glycerol	Glutamine	3-methyl-2-oxovalerate			Camphene	Dimethoxymethane
AC-C16	AC-C16	AC-C16		Propyelene Glycol	Phenyalanine	Acetone				1-butoxy, 2-propanol
PC aa C32:1	PC aa C32:1	PC aa C32:1		Sebacate	GPC	Isoleucine
PC aa C36:5	PC aa C36:5	PC aa C36:5		Glucose	Lysine	Lactate
AC-C3	AC-C3	AC-C3			N-Acetyl proteins/metabolites	Mannose
proline	proline	proline				Proline
sarcosine	sarcosine	sarcosine				Tyrosine
AC-C4	AC-C4	AC-C4				Valine
lysoPC a C18:2	lysoPC a C18:2	lysoPC a C18:2				Tryptophan
lysoPC a C20:3	lysoPC a C20:3	lysoPC a C20:3
lysoPC a C20:4	lysoPC a C20:4	lysoPC a C20:4
lysoPC a C18:1	lysoPC a C18:1	lysoPC a C18:1
glycine	glycine	AC-C14:1
AC-C18:1	AC-C18:1	AC-C18
alanine	alanine	PC aa C36:2
tyrosine	tyrosine	lysoPC a C16:0
alpha-AAA	alpha-AAA	lysoPC a C18:0
PC ae C36:2	PC ae C36:2	taurine
isoleucine	isoleucine
PC aa C36:1	PC aa C36:1
PC aa C36:3	PC aa C36:3
valine	valine
PC aa C40:2	PC aa C40:2
kynurenine	AC-C14:1
PC aa C34:4	AC-C18
PC ae C34:1	PC aa C36:2
PC aa C36:6	lysoPC a C16:0
PC ae C30:0	lysoPC a C18:0
PC aa C36:0	lysoPC a C26:0
SM C20:2	ornithine
PC ae C34:0	AC-C0
AC-C5	PC aa C36:4
PC aa C42:2	PC ae C44:3
	PC ae C40:1
	lysoPC a C16:1
	lysoPC a C17:0
	threonine

## Sheet: TS12-Diet Comp. Serum, Muscle
Metabolite lists pertaining to significant changes in metabolites in am vs pm comparison prior to and post high fat diet (HFD) / high carbohydrate diet (HCD) in serum (Sato, Left) and skeletal muscle (Sato, Right). Common metabolites prior to/post diet condition are highlighted within their respective groups.
	Significantly different metabolutes, am Vs pm, prior to HFD	Significantly different metabolutes, am Vs pm, post HFD	Significantly different metabolutes, am Vs pm, prior to HCD	Significantly different metabolutes, am Vs pm, post HCD			Significantly different metabolutes, am Vs pm, prior to HFD	Significantly different metabolutes, am Vs pm, post HFD	Significantly different metabolutes, am Vs pm, prior to HCD	Significantly different metabolutes, am Vs pm, post HCD
Bio fluid	Serum (Light blue - common to both before/after HFD)		Serum (Light orange - common to both before/after HFD)				Muscle (Light blue - common to both before/after HFD)		Muscle (Light orange - common to both before/after HFD)
	(N(1) + N(8))-acetylspermidine	(N(1) + N(8))-acetylspermidine	1,2-dipalmitoyl-GPE (16:0/16:0)*	1,2-dipalmitoyl-GPE (16:0/16:0)*			1-(1-enyl-stearoyl)-2-oleoyl-GPE (P-18:0/18:1)	1-(1-enyl-stearoyl)-2-oleoyl-GPE (P-18:0/18:1)	10-heptadecenoate (17:1n7)	10-heptadecenoate (17:1n7)
	1,2-dilinoleoyl-GPC (18:2/18:2)	1,2-dilinoleoyl-GPC (18:2/18:2)	12,13-DiHOME	12,13-DiHOME			2-hydroxybutyrate/2-hydroxyisobutyrate	2-hydroxybutyrate/2-hydroxyisobutyrate	2-hydroxybutyrate/2-hydroxyisobutyrate	2-hydroxybutyrate/2-hydroxyisobutyrate
	1,2-dipalmitoyl-GPE (16:0/16:0)*	1,2-dipalmitoyl-GPE (16:0/16:0)*	17alpha-hydroxypregnenolone 3-sulfate	17alpha-hydroxypregnenolone 3-sulfate			2-methylbutyrylcarnitine (C5)	2-methylbutyrylcarnitine (C5)	2-hydroxyglutarate	2-hydroxyglutarate
	12,13-DiHOME	12,13-DiHOME	1-linoleoyl-GPE (18:2)*	1-linoleoyl-GPE (18:2)*			3-(4-hydroxyphenyl)lactate	3-(4-hydroxyphenyl)lactate	2-methylbutyrylcarnitine (C5)	2-methylbutyrylcarnitine (C5)
	13-HODE + 9-HODE	13-HODE + 9-HODE	1-methylimidazoleacetate	1-methylimidazoleacetate			3-hydroxyisobutyrate	3-hydroxyisobutyrate	3-hydroxyisobutyrate	3-hydroxyisobutyrate
	13-methylmyristate	13-methylmyristate	1-methylnicotinamide	1-methylnicotinamide			6-phosphogluconate	6-phosphogluconate	acisoga	acisoga
	15-methylpalmitate	15-methylpalmitate	2-aminoadipate	2-aminoadipate			acisoga	acisoga	ceramide (d18:1/17:0, d17:1/18:0)*	ceramide (d18:1/17:0, d17:1/18:0)*
	1-arachidonoyl-GPE (20:4n6)*	1-arachidonoyl-GPE (20:4n6)*	2-aminophenol sulfate	2-aminophenol sulfate			cytidine	cytidine	cholesterol	cholesterol
	1-linoleoyl-2-arachidonoyl-GPC (18:2/20:4n6)*	1-linoleoyl-2-arachidonoyl-GPC (18:2/20:4n6)*	2-hydroxybutyrate/2-hydroxyisobutyrate	2-hydroxybutyrate/2-hydroxyisobutyrate			cytidine 5'-diphosphocholine	cytidine 5'-diphosphocholine	cytidine	cytidine
	1-linoleoyl-2-linolenoyl-GPC (18:2/18:3)*	1-linoleoyl-2-linolenoyl-GPC (18:2/18:3)*	2-hydroxyglutarate	2-hydroxyglutarate			glycochenodeoxycholate	glycochenodeoxycholate	cytidine 5'-diphosphocholine	cytidine 5'-diphosphocholine
	1-linoleoyl-GPE (18:2)*	1-linoleoyl-GPE (18:2)*	2-isopropylmalate	2-isopropylmalate			isobutyrylcarnitine (C4)	isobutyrylcarnitine (C4)	dihomo-linoleate (20:2n6)	dihomo-linoleate (20:2n6)
	1-methylnicotinamide	1-methylnicotinamide	2-keto-3-deoxy-gluconate	2-keto-3-deoxy-gluconate			isovalerylcarnitine (C5)	isovalerylcarnitine (C5)	erucate (22:1n9)	erucate (22:1n9)
	1-myristoyl-2-palmitoyl-GPC (14:0/16:0)	1-myristoyl-2-palmitoyl-GPC (14:0/16:0)	2-methylbutyrylcarnitine (C5)	2-methylbutyrylcarnitine (C5)			lactosyl-N-nervonoyl-sphingosine (d18:1/24:1)*	lactosyl-N-nervonoyl-sphingosine (d18:1/24:1)*	fructose	fructose
	1-myristoylglycerol (14:0)	1-myristoylglycerol (14:0)	2-oxoarginine*	2-oxoarginine*			lactosyl-N-palmitoyl-sphingosine (d18:1/16:0)	lactosyl-N-palmitoyl-sphingosine (d18:1/16:0)	glucose	glucose
	1-oleoyl-2-linoleoyl-GPE (18:1/18:2)*	1-oleoyl-2-linoleoyl-GPE (18:1/18:2)*	3-hydroxy-3-methylglutarate	3-hydroxy-3-methylglutarate			maltose	maltose	glutamate	glutamate
	1-oleoyl-GPE (18:1)	1-oleoyl-GPE (18:1)	3-hydroxyisobutyrate	3-hydroxyisobutyrate			N-acetylasparagine	N-acetylasparagine	glycochenodeoxycholate	glycochenodeoxycholate
	1-palmitoyl-2-linoleoyl-GPE (16:0/18:2)	1-palmitoyl-2-linoleoyl-GPE (16:0/18:2)	3-hydroxylaurate	3-hydroxylaurate			pyrraline	pyrraline	glycocholate	glycocholate
	1-palmitoyl-2-linoleoyl-GPI (16:0/18:2)	1-palmitoyl-2-linoleoyl-GPI (16:0/18:2)	3-hydroxypyridine sulfate	3-hydroxypyridine sulfate			sphingadienine	sphingadienine	isobutyrylcarnitine (C4)	isobutyrylcarnitine (C4)
	1-palmitoyl-2-oleoyl-GPE (16:0/18:1)	1-palmitoyl-2-oleoyl-GPE (16:0/18:1)	3-methyl catechol sulfate (1)	3-methyl catechol sulfate (1)			1-(1-enyl-oleoyl)-GPE (P-18:1)*	1-palmitoleoylglycerol (16:1)*	isovalerylcarnitine (C5)	isovalerylcarnitine (C5)
	1-stearoyl-2-linoleoyl-GPE (18:0/18:2)*	1-stearoyl-2-linoleoyl-GPE (18:0/18:2)*	3-methyl-2-oxovalerate	3-methyl-2-oxovalerate			1-(1-enyl-palmitoyl)-2-palmitoleoyl-GPC (P-16:0/16:1)*	1-palmitoyl-2-linoleoyl-GPC (16:0/18:2)	lactosyl-N-nervonoyl-sphingosine (d18:1/24:1)*	lactosyl-N-nervonoyl-sphingosine (d18:1/24:1)*
	2-aminophenol sulfate	2-aminophenol sulfate	4-acetylphenol sulfate	4-acetylphenol sulfate			1-(1-enyl-palmitoyl)-GPE (P-16:0)*	3-hydroxybutyrate (BHBA)	lactosyl-N-palmitoyl-sphingosine (d18:1/16:0)	lactosyl-N-palmitoyl-sphingosine (d18:1/16:0)
	2-hydroxybutyrate/2-hydroxyisobutyrate	2-hydroxybutyrate/2-hydroxyisobutyrate	4-guanidinobutanoate	4-guanidinobutanoate			1-(1-enyl-stearoyl)-GPE (P-18:0)*	3-hydroxybutyrylcarnitine (1)	maltose	maltose
	2-isopropylmalate	2-isopropylmalate	4-hydroxyhippurate	4-hydroxyhippurate			1,2-dipalmitoyl-GPE (16:0/16:0)*	3-methylglutaconate	margarate (17:0)	margarate (17:0)
	3-hydroxy-3-methylglutarate	3-hydroxy-3-methylglutarate	4-hydroxyphenylpyruvate	4-hydroxyphenylpyruvate			10-heptadecenoate (17:1n7)	4-methyl-2-oxopentanoate	N-stearoyl-sphingadienine (d18:2/18:0)*	N-stearoyl-sphingadienine (d18:2/18:0)*
	3-hydroxyhexanoate	3-hydroxyhexanoate	4-imidazoleacetate	4-imidazoleacetate			1-arachidonoyl-GPI (20:4)*	beta-citrylglutamate	N-stearoyl-sphingosine (d18:1/18:0)*	N-stearoyl-sphingosine (d18:1/18:0)*
	3-hydroxyisobutyrate	3-hydroxyisobutyrate	9,10-DiHOME	9,10-DiHOME			1-oleoyl-2-arachidonoyl-GPI (18:1/20:4) *	caffeine	oleate/vaccenate (18:1)	oleate/vaccenate (18:1)
	3-hydroxyoctanoate	3-hydroxyoctanoate	acetoacetate	acetoacetate			1-oleoyl-2-linoleoyl-GPE (18:1/18:2)*	choline phosphate	ornithine	ornithine
	3-hydroxypyridine sulfate	3-hydroxypyridine sulfate	aconitate [cis or trans]	aconitate [cis or trans]			1-oleoylglycerol (18:1)	glycine	palmitate (16:0)	palmitate (16:0)
	4-hydroxyphenylpyruvate	4-hydroxyphenylpyruvate	adenosine	adenosine			1-palmitoyl-2-arachidonoyl-GPI (16:0/20:4)*	lidocaine	phenyllactate (PLA)	phenyllactate (PLA)
	5-hydroxylysine	5-hydroxylysine	adipate	adipate			1-palmitoyl-2-oleoyl-GPG (16:0/18:1)	methionine sulfoxide	succinate	succinate
	9,10-DiHOME	9,10-DiHOME	alpha-ketobutyrate	alpha-ketobutyrate			1-palmitoyl-2-stearoyl-GPC (16:0/18:0)	N1-Methyl-4-pyridone-3-carboxamide	1-(1-enyl-stearoyl)-2-arachidonoyl-GPE (P-18:0/20:4)*	1-(1-enyl-stearoyl)-2-oleoyl-GPE (P-18:0/18:1)
	aconitate [cis or trans]	aconitate [cis or trans]	alpha-ketoglutarate	alpha-ketoglutarate			1-stearoyl-2-arachidonoyl-GPI (18:0/20:4)	oleoyl-linolenoyl-glycerol (18:1/18:3) [2]*	1-oleoylglycerol (18:1)	1,2-dipalmitoyl-GPC (16:0/16:0)
	adipate	adipate	androstenediol (3alpha, 17alpha) monosulfate (2)	androstenediol (3alpha, 17alpha) monosulfate (2)			1-stearoyl-2-arachidonoyl-GPS (18:0/20:4)	propionylcarnitine (C3)	3-hydroxybutyrylcarnitine (2)	1,2-dipalmitoyl-GPE (16:0/16:0)*
	alpha-ketobutyrate	alpha-ketobutyrate	anthranilate	anthranilate			1-stearoyl-2-linoleoyl-GPS (18:0/18:2)	pseudouridine	3-methyl-2-oxovalerate	10-nonadecenoate (19:1n9)
	alpha-ketoglutarate	alpha-ketoglutarate	arachidonoylcholine	arachidonoylcholine			1-stearoyl-2-oleoyl-GPE (18:0/18:1)	stearoyl-linoleoyl-glycerol (18:0/18:2) [2]*	adenosine	15-methylpalmitate
	androstenediol (3alpha, 17alpha) monosulfate (2)	androstenediol (3alpha, 17alpha) monosulfate (2)	arginine	arginine			1-stearoyl-2-oleoyl-GPS (18:0/18:1)	sulfate*	alpha-ketoglutarate	17-methylstearate
	arabonate/xylonate	arabonate/xylonate	ascorbate (Vitamin C)	ascorbate (Vitamin C)			1-stearoyl-GPE (18:0)		beta-citrylglutamate	1-linoleoyl-2-arachidonoyl-GPC (18:2/20:4n6)*
	arachidonoylcholine	arachidonoylcholine	asparagine	asparagine			2-hydroxyglutarate		butyrylcarnitine (C4)	1-methylhistamine
	asparagine	asparagine	azelate (nonanedioate)	azelate (nonanedioate)			3-hydroxybutyrylcarnitine (2)		ceramide (d18:1/14:0, d16:1/16:0)*	1-methylhistidine
	behenate (22:0)*	behenate (22:0)*	betaine	betaine			acetyl CoA		ceramide (d18:1/20:0, d16:1/22:0, d20:1/18:0)*	1-oleoyl-2-arachidonoyl-GPE (18:1/20:4)*
	beta-alanine	beta-alanine	caffeic acid sulfate	caffeic acid sulfate			alanylleucine		ceramide (d18:2/24:1, d18:1/24:2)*	1-oleoyl-GPC (18:1)
	caffeic acid sulfate	caffeic acid sulfate	caprate (10:0)	caprate (10:0)			butyrylcarnitine (C4)		choline phosphate	1-palmitoyl-2-arachidonoyl-GPE (16:0/20:4)*
	caprate (10:0)	caprate (10:0)	caprylate (8:0)	caprylate (8:0)			ceramide (d18:1/20:0, d16:1/22:0, d20:1/18:0)*		glycine	1-palmitoyl-2-arachidonoyl-GPI (16:0/20:4)*
	caprylate (8:0)	caprylate (8:0)	ceramide (d18:1/14:0, d16:1/16:0)*	ceramide (d18:1/14:0, d16:1/16:0)*			coenzyme A		hexanoylcarnitine (C6)	1-palmitoyl-2-docosahexaenoyl-GPE (16:0/22:6)*
	ceramide (d18:1/14:0, d16:1/16:0)*	ceramide (d18:1/14:0, d16:1/16:0)*	choline phosphate	choline phosphate			cysteine		lignoceroylcarnitine (C24)*	1-palmitoyl-2-linoleoyl-GPE (16:0/18:2)
	ceramide (d18:1/17:0, d17:1/18:0)*	ceramide (d18:1/17:0, d17:1/18:0)*	cis-4-decenoylcarnitine (C10:1)	cis-4-decenoylcarnitine (C10:1)			cytidine 5'-monophospho-N-acetylneuraminic acid		linolenate [alpha or gamma; (18:3n3 or 6)]	1-palmitoyl-2-oleoyl-GPE (16:0/18:1)
	choline phosphate	choline phosphate	citraconate/glutaconate	citraconate/glutaconate			cytidine-5'-diphosphoethanolamine		linoleoyl ethanolamide	1-palmitoyl-2-stearoyl-GPC (16:0/18:0)
	citraconate/glutaconate	citraconate/glutaconate	cortisol	cortisol			dimethylglycine		myristoleate (14:1n5)	1-stearoyl-2-arachidonoyl-GPC (18:0/20:4)
	cortisol	cortisol	cortisone	cortisone			ethylmalonate		N-methylproline	1-stearoyl-2-docosahexaenoyl-GPC (18:0/22:6)
	cortisone	cortisone	creatine	creatine			fructose		N-palmitoyl-sphingadienine (d18:2/16:0)*	1-stearoyl-2-oleoyl-GPE (18:0/18:1)
	creatine	creatine	cystathionine	cystathionine			galactonate		palmitoleate (16:1n7)	2,3-dihydroxyisovalerate
	cytosine	cytosine	cytosine	cytosine			glutamate		palmitoyl ethanolamide	2-stearoyl-GPE (18:0)*
	dihomo-linolenoyl-choline	dihomo-linolenoyl-choline	decanoylcarnitine (C10)	decanoylcarnitine (C10)			glycocholate		phosphoethanolamine	3-(4-hydroxyphenyl)lactate
	dimethylglycine	dimethylglycine	dihomo-linolenoyl-choline	dihomo-linolenoyl-choline			glycodeoxycholate		S-adenosylmethionine (SAM)	3-hydroxy-3-methylglutarate
	docosahexaenoylcholine	docosahexaenoylcholine	dihydroferulic acid	dihydroferulic acid			glycosyl-N-stearoyl-sphingosine (d18:1/18:0)		sphingadienine	3-hydroxybutyrate (BHBA)
	dodecanedioate	dodecanedioate	dimethylglycine	dimethylglycine			glycylvaline		sphingomyelin (d18:1/18:1, d18:2/18:0)	3-indoxyl sulfate
	dopamine 3-O-sulfate	dopamine 3-O-sulfate	docosahexaenoylcarnitine (C22:6)*	docosahexaenoylcarnitine (C22:6)*			linolenate [alpha or gamma; (18:3n3 or 6)]		stachydrine	3-methyl-2-oxobutyrate
	eicosapentaenoylcholine	eicosapentaenoylcholine	docosahexaenoylcholine	docosahexaenoylcholine			maleate		stearoyl ethanolamide	3-methylglutaconate
	erythronate*	erythronate*	dopamine 3-O-sulfate	dopamine 3-O-sulfate			methylmalonate (MMA)		trimethylamine N-oxide	6-phosphogluconate
	etiocholanolone glucuronide	etiocholanolone glucuronide	eicosapentaenoylcholine	eicosapentaenoylcholine			nicotinamide			adenine
	gamma-glutamylhistidine	gamma-glutamylhistidine	erythronate*	erythronate*			N-methylproline			adenosine 3',5'-cyclic monophosphate (cAMP)
	gamma-glutamylmethionine	gamma-glutamylmethionine	fructose	fructose			N-palmitoyl-sphinganine (d18:0/16:0)			AICA ribonucleotide
	gamma-glutamylphenylalanine	gamma-glutamylphenylalanine	fumarate	fumarate			N-stearoyl-sphingosine (d18:1/18:0)*			alanylleucine
	gamma-glutamyltyrosine	gamma-glutamyltyrosine	gamma-glutamylleucine	gamma-glutamylleucine			palmitoleate (16:1n7)			alpha-hydroxyisovalerate
	gamma-glutamylvaline	gamma-glutamylvaline	gamma-glutamylphenylalanine	gamma-glutamylphenylalanine			phenyllactate (PLA)			androstenediol (3beta,17beta) disulfate (1)
	gluconate	gluconate	gamma-glutamyltyrosine	gamma-glutamyltyrosine			proline			androsterone sulfate
	glucose	glucose	gamma-glutamylvaline	gamma-glutamylvaline			pyruvate			arabonate/xylonate
	glutamate	glutamate	gluconate	gluconate			sedoheptulose-7-phosphate			arachidate (20:0)
	glycerate	glycerate	glucose	glucose			sphingomyelin (d18:1/17:0, d17:1/18:0, d19:1/16:0)			aspartate
	glycerophosphoglycerol	glycerophosphoglycerol	glutamate	glutamate			stearate (18:0)			behenate (22:0)*
	glycochenodeoxycholate	glycochenodeoxycholate	glycerate	glycerate			succinate			behenoyl dihydrosphingomyelin (d18:0/22:0)*
	glycochenodeoxycholate glucuronide (1)	glycochenodeoxycholate glucuronide (1)	glycerophosphoglycerol	glycerophosphoglycerol			thioproline			beta-hydroxyisovalerate
	glycochenodeoxycholate sulfate	glycochenodeoxycholate sulfate	glycochenodeoxycholate	glycochenodeoxycholate			tiglylcarnitine (C5:1-DC)			caffeine
	glycocholate	glycocholate	glycochenodeoxycholate glucuronide (1)	glycochenodeoxycholate glucuronide (1)			UDP-glucuronate			ceramide (d16:1/24:1, d18:1/22:1)*
	glycodeoxycholate	glycodeoxycholate	glycocholate	glycocholate			valylglycine			C-glycosyltryptophan
	glycodeoxycholate sulfate	glycodeoxycholate sulfate	glycodeoxycholate	glycodeoxycholate						choline
	glycolithocholate	glycolithocholate	glycohyocholate	glycohyocholate						coenzyme A
	glycoursodeoxycholate	glycoursodeoxycholate	glycolithocholate	glycolithocholate						creatine phosphate
	hexadecanedioate	hexadecanedioate	glycoursodeoxycholate	glycoursodeoxycholate						cysteine
	hexanoylglutamine	hexanoylglutamine	hexadecanedioate	hexadecanedioate						cytidine 5'-monophospho-N-acetylneuraminic acid
	hydantoin-5-propionic acid	hydantoin-5-propionic acid	hydantoin-5-propionic acid	hydantoin-5-propionic acid						dehydroisoandrosterone sulfate (DHEA-S)
	imidazole lactate	imidazole lactate	hydroquinone sulfate	hydroquinone sulfate						dihomo-linolenate (20:3n3 or n6)
	indole-3-carboxylic acid	indole-3-carboxylic acid	imidazole lactate	imidazole lactate						dihydroxyacetone phosphate (DHAP)
	indolelactate	indolelactate	indole-3-carboxylic acid	indole-3-carboxylic acid						dimethylglycine
	isoleucine	isoleucine	isobutyrylcarnitine (C4)	isobutyrylcarnitine (C4)						docosadienoate (22:2n6)
	isovalerylcarnitine (C5)	isovalerylcarnitine (C5)	isoleucine	isoleucine						docosapentaenoate (n6 DPA; 22:5n6)
	kynurenine	kynurenine	isovalerylcarnitine (C5)	isovalerylcarnitine (C5)						eicosenoate (20:1)
	lanthionine	lanthionine	laurylcarnitine (C12)	laurylcarnitine (C12)						erythronate*
	leucine	leucine	leucine	leucine						galactonate
	lidocaine	lidocaine	lidocaine	lidocaine						gamma-glutamylcysteine
	linoleoylcarnitine (C18:2)*	linoleoylcarnitine (C18:2)*	linoleoylcholine*	linoleoylcholine*						gamma-glutamyl-epsilon-lysine
	linoleoylcholine*	linoleoylcholine*	maleate	maleate						gamma-glutamylglutamine
	margaroylcarnitine*	margaroylcarnitine*	maltose	maltose						gluconate
	methionine sulfoxide	methionine sulfoxide	mannitol/sorbitol	mannitol/sorbitol						glutamate, gamma-methyl ester
	myristate (14:0)	myristate (14:0)	mannose	mannose						glutathione, reduced (GSH)
	myristoylcarnitine (C14)	myristoylcarnitine (C14)	mead acid (20:3n9)	mead acid (20:3n9)						glycerate
	N-(2-furoyl)glycine	N-(2-furoyl)glycine	methionine	methionine						glycodeoxycholate
	N1-methylinosine	N1-methylinosine	methionine sulfoxide	methionine sulfoxide						glycosyl-N-palmitoyl-sphingosine (d18:1/16:0)
	N-acetylaspartate (NAA)	N-acetylaspartate (NAA)	methylmalonate (MMA)	methylmalonate (MMA)						glycylvaline
	N-acetylglutamate	N-acetylglutamate	myristoleoylcarnitine (C14:1)*	myristoleoylcarnitine (C14:1)*						heme
	N-ethylglycinexylidide	N-ethylglycinexylidide	N-(2-furoyl)glycine	N-(2-furoyl)glycine						indoleacetate
	nicotinamide	nicotinamide	N2,N2-dimethylguanosine	N2,N2-dimethylguanosine						indolelactate
	N-methylalanine	N-methylalanine	N-acetylarginine	N-acetylarginine						laurylcarnitine (C12)
	N-palmitoyl-heptadecasphingosine (d17:1/16:0)*	N-palmitoyl-heptadecasphingosine (d17:1/16:0)*	N-acetylglutamate	N-acetylglutamate						leucine
	N-palmitoyl-sphingadienine (d18:2/16:0)*	N-palmitoyl-sphingadienine (d18:2/16:0)*	N-acetylleucine	N-acetylleucine						leucylglycine
	N-palmitoyl-sphinganine (d18:0/16:0)	N-palmitoyl-sphinganine (d18:0/16:0)	N-acetylmethionine	N-acetylmethionine						linoleoyl-arachidonoyl-glycerol (18:2/20:4) [2]*
	N-palmitoyl-sphingosine (d18:1/16:0)	N-palmitoyl-sphingosine (d18:1/16:0)	N-ethylglycinexylidide	N-ethylglycinexylidide						linoleoyl-linoleoyl-glycerol (18:2/18:2) [2]*
	N-stearoyl-sphingadienine (d18:2/18:0)*	N-stearoyl-sphingadienine (d18:2/18:0)*	nicotinamide	nicotinamide						methionine sulfoxide
	N-stearoyl-sphinganine (d18:0/18:0)*	N-stearoyl-sphinganine (d18:0/18:0)*	N-methylalanine	N-methylalanine						methylphosphate
	octadecanedioate	octadecanedioate	N-palmitoyl-sphinganine (d18:0/16:0)	N-palmitoyl-sphinganine (d18:0/16:0)						myristoyl dihydrosphingomyelin (d18:0/14:0)*
	oleoylcholine	oleoylcholine	octadecanedioate	octadecanedioate						N6-acetyllysine
	ornithine	ornithine	octanoylcarnitine (C8)	octanoylcarnitine (C8)						N-acetylalanine
	orotate	orotate	oleoylcholine	oleoylcholine						N-acetylmethionine
	palmitoloelycholine	palmitoloelycholine	ornithine	ornithine						nervonate (24:1n9)*
	palmitoylcholine	palmitoylcholine	palmitoloelycholine	palmitoloelycholine						N-formylmethionine
	pentadecanoate (15:0)	pentadecanoate (15:0)	palmitoylcholine	palmitoylcholine						nonadecanoate (19:0)
	phenylalanine	phenylalanine	phenylalanine	phenylalanine						N-palmitoyl-sphinganine (d18:0/16:0)
	phenyllactate (PLA)	phenyllactate (PLA)	phenyllactate (PLA)	phenyllactate (PLA)						N-palmitoyl-sphingosine (d18:1/16:0)
	pregnenolone sulfate	pregnenolone sulfate	phenylpyruvate	phenylpyruvate						N-stearoyl-sphinganine (d18:0/18:0)*
	proline	proline	proline	proline						oleoyl-linoleoyl-glycerol (18:1/18:2) [1]
	prolylglycine	prolylglycine	prolylglycine	prolylglycine						oleoyl-linoleoyl-glycerol (18:1/18:2) [2]
	pyridoxal	pyridoxal	pyridoxal	pyridoxal						oleoyl-oleoyl-glycerol (18:1/18:1) [1]*
	pyrraline	pyrraline	pyridoxate	pyridoxate						oleoyl-oleoyl-glycerol (18:1/18:1) [2]*
	sebacate (decanedioate)	sebacate (decanedioate)	pyrraline	pyrraline						orotate
	serine	serine	pyruvate	pyruvate						palmitoyl dihydrosphingomyelin (d18:0/16:0)*
	S-methylmethionine	S-methylmethionine	ribonate	ribonate						palmitoyl sphingomyelin (d18:1/16:0)
	stearoyl ethanolamide	stearoyl ethanolamide	S-1-pyrroline-5-carboxylate	S-1-pyrroline-5-carboxylate						palmitoyl-docosahexaenoyl-glycerol (16:0/22:6) [1]*
	stearoylcholine*	stearoylcholine*	sarcosine	sarcosine						palmitoyl-docosahexaenoyl-glycerol (16:0/22:6) [2]*
	suberate (octanedioate)	suberate (octanedioate)	serine	serine						palmitoyl-oleoyl-glycerol (16:0/18:1) [2]*
	sucrose	sucrose	S-methylmethionine	S-methylmethionine						phenol sulfate
	taurochenodeoxycholate	taurochenodeoxycholate	stearoylcholine*	stearoylcholine*						phenylalanine
	taurocholate	taurocholate	sucrose	sucrose						pipecolate
	taurodeoxycholate	taurodeoxycholate	taurochenodeoxycholate	taurochenodeoxycholate						proline
	tauroursodeoxycholate	tauroursodeoxycholate	taurocholate	taurocholate						propionylcarnitine (C3)
	tyramine O-sulfate	tyramine O-sulfate	tauroursodeoxycholate	tauroursodeoxycholate						pyrraline
	tyrosine	tyrosine	threonine	threonine						S-1-pyrroline-5-carboxylate
	valine	valine	tryptophan	tryptophan						S-adenosylhomocysteine (SAH)
	xylose	xylose	tyramine O-sulfate	tyramine O-sulfate						S-allylcysteine
	1,2-dipalmitoyl-GPC (16:0/16:0)	1-(1-enyl-stearoyl)-2-oleoyl-GPE (P-18:0/18:1)	tyrosine	tyrosine						sedoheptulose-7-phosphate
	17alpha-hydroxypregnenolone 3-sulfate	1,2,3-benzenetriol sulfate (2)	valine	valine						S-methylcysteine
	1-linoleoyl-GPC (18:2)	1,3,7-trimethylurate	xanthine	xanthine						sphinganine
	1-palmitoyl-2-arachidonoyl-GPC (16:0/20:4n6)	10-heptadecenoate (17:1n7)	xylose	xylose						sphingomyelin (d17:1/16:0, d18:1/15:0, d16:1/17:0)*
	1-palmitoyl-2-arachidonoyl-GPI (16:0/20:4)*	10-nonadecenoate (19:1n9)	(N(1) + N(8))-acetylspermidine	1-(1-enyl-palmitoyl)-GPC (P-16:0)*						sphingomyelin (d18:1/20:1, d18:2/20:0)*
	1-palmitoyl-2-linoleoyl-GPC (16:0/18:2)	10-undecenoate (11:1n1)	1-(1-enyl-oleoyl)-GPE (P-18:1)*	1,2,3-benzenetriol sulfate (2)						stearate (18:0)
	1-palmitoyl-2-stearoyl-GPC (16:0/18:0)	16-hydroxypalmitate	1-arachidonoyl-GPE (20:4n6)*	1,2-dilinoleoyl-GPC (18:2/18:2)						stearoyl sphingomyelin (d18:1/18:0)
	1-palmitoyl-GPC (16:0)	17-methylstearate	1-arachidonylglycerol (20:4)	13-HODE + 9-HODE						stearoyl-arachidonoyl-glycerol (18:0/20:4) [1]*
	1-palmitoyl-GPE (16:0)	1-arachidonoyl-GPI (20:4)*	1-myristoylglycerol (14:0)	1-dihomo-linolenylglycerol (20:3)						sulfate*
	1-stearoyl-2-linoleoyl-GPC (18:0/18:2)*	1-linolenoyl-GPC (18:3)*	1-oleoyl-2-linoleoyl-GPE (18:1/18:2)*	1-docosahexaenoylglycerol (22:6)						thioproline
	1-stearoyl-GPE (18:0)	1-linoleoyl-GPI (18:2)*	1-palmitoyl-2-linoleoyl-GPI (16:0/18:2)	1-methylhistidine						tiglylcarnitine (C5:1-DC)
	2-hydroxy-3-methylvalerate	1-methylhistidine	1-stearoyl-2-arachidonoyl-GPI (18:0/20:4)	2,3-dihydroxyisovalerate						trans-4-hydroxyproline
	2-keto-3-deoxy-gluconate	1-palmitoleoyl-2-linolenoyl-GPC (16:1/18:3)*	1-stearoyl-2-linoleoyl-GPE (18:0/18:2)*	2-aminoheptanoate						tryptophan
	3-methyl-2-oxovalerate	1-palmitoyl-2-oleoyl-GPI (16:0/18:1)*	21-hydroxypregnenolone disulfate	2-hydroxy-3-methylvalerate						tryptophan betaine
	4-acetylphenol sulfate	1-palmitoyl-GPI (16:0)	2-linoleoylglycerol (18:2)	2-hydroxydecanoate						tyrosine
	4-methyl-2-oxopentanoate	1-stearoyl-2-arachidonoyl-GPI (18:0/20:4)	3-aminoisobutyrate	2-hydroxyoctanoate						UDP-glucuronate
	4-vinylguaiacol sulfate	1-stearoyl-2-linoleoyl-GPI (18:0/18:2)	3-methylglutaconate	3-(3-hydroxyphenyl)propionate						UDP-N-acetylglucosamine/galactosamine
	5-(galactosylhydroxy)-L-lysine	1-stearoyl-2-oleoyl-GPE (18:0/18:1)	3-ureidopropionate	3-hydroxybutyrate (BHBA)						urate
	5-oxoproline	2,3-dihydroxyisovalerate	5-(galactosylhydroxy)-L-lysine	3-hydroxyhippurate						urea
	alpha-hydroxyisovalerate	2-aminoadipate	5,6-dihydrothymine	3-hydroxyoctanoate						uridine
	anthranilate	2-hydroxydecanoate	5-hydroxylysine	3-methoxycatechol sulfate (1)						valine
	arachidoylcarnitine (C20)*	2-hydroxyhippurate (salicylurate)	5-oxoproline	3-methylcytidine						xanthine
	arginine	2-hydroxynervonate*	acesulfame	4-methyl-2-oxopentanoate
	ascorbate (Vitamin C)	2-hydroxyphenylacetate	alanine	4-methylcatechol sulfate
	betaine	2-methylbutyrylcarnitine (C5)	beta-alanine	4-vinylguaiacol sulfate
	bilirubin (E,Z or Z,E)*	2-oxoarginine*	beta-citrylglutamate	4-vinylphenol sulfate
	ceramide (d18:1/20:0, d16:1/22:0, d20:1/18:0)*	3-(3-hydroxyphenyl)propionate	bradykinin, des-arg(9)	acisoga
	cerotoylcarnitine (C26)*	3-hydroxy-2-ethylpropionate	chiro-inositol	ADpSGEGDFXAEGGGVR*
	chiro-inositol	3-hydroxybutyrate (BHBA)	creatinine	adrenoylcarnitine (C22:4)*
	cysteine sulfinic acid	3-hydroxybutyrylcarnitine (2)	ectoine	allantoin
	dihomo-linolenoylcarnitine (20:3n3 or 6)*	3-hydroxydecanoate	eicosanodioate	alpha-hydroxyisocaproate
	dihomo-linoleoylcarnitine (C20:2)*	3-hydroxyhippurate	ethyl glucuronide	arabinose
	docosapentaenoylcarnitine (C22:5n3)*	3-hydroxylaurate	etiocholanolone glucuronide	arabonate/xylonate
	ectoine	3-methyl catechol sulfate (1)	gamma-glutamyl-alpha-lysine	arachidonoylcarnitine (C20:4)
	ethyl glucuronide	3-methyladipate	gamma-glutamylglutamate	argininate*
	eugenol sulfate	4-ethylphenylsulfate	gamma-glutamylhistidine	bilirubin (E,E)*
	fructose	4-guanidinobutanoate	gamma-glutamylmethionine	bilirubin (E,Z or Z,E)*
	fumarate	4-imidazoleacetate	indolelactate	bilirubin (Z,Z)
	gamma-glutamyl-alpha-lysine	5-bromotryptophan	lysine	biliverdin
	gamma-glutamylglutamate	5-dodecenoate (12:1n7)	methyl glucopyranoside (alpha + beta)	caffeine
	gamma-glutamylisoleucine*	5-methylthioadenosine (MTA)	methylsuccinate	chenodeoxycholate
	glycohyocholate	acetoacetate	N1-methylinosine	cholate
	glycosyl-N-(2-hydroxynervonoyl)-sphingosine (d18:1/24:1(2OH))*	acetylcarnitine (C2)	N-acetyl-beta-alanine	deoxycholate
	heme	acisoga	N-acetylglutamine	dihomo-linolenate (20:3n3 or n6)
	histidine	adipoylcarnitine (C6-DC)	N-acetylphenylalanine	dihomo-linolenoylcarnitine (20:3n3 or 6)*
	hydroquinone sulfate	adrenate (22:4n6)	nervonoylcarnitine (C24:1)*	dihomo-linoleoylcarnitine (C20:2)*
	lactate	arachidate (20:0)	N-methylproline	docosapentaenoate (n6 DPA; 22:5n6)
	laurylcarnitine (C12)	arachidonoylcarnitine (C20:4)	orotate	docosapentaenoylcarnitine (C22:5n3)*
	mannitol/sorbitol	azelate (nonanedioate)	pregnenolone sulfate	DSGEGDFXAEGGGVR*
	mannose	beta-citrylglutamate	stachydrine	eicosenoylcarnitine (C20:1)*
	methionine	caffeine	thioproline	erucate (22:1n9)
	methylmalonate (MMA)	carnitine	trans-urocanate	eugenol sulfate
	N1-methyladenosine	chenodeoxycholate	trimethylamine N-oxide	ferulic acid 4-sulfate
	N2,N2-dimethylguanosine	choline	vanillic alcohol sulfate	galactonate
	N-acetylasparagine	cis-4-decenoylcarnitine (C10:1)		gamma-CEHC
	N-acetylleucine	citrulline		gamma-glutamylisoleucine*
	N-acetylmethionine	cystathionine		gamma-glutamyltryptophan
	N-behenoyl-sphingadienine (d18:2/22:0)*	cytidine		glucuronate
	nervonoylcarnitine (C24:1)*	decanoylcarnitine (C10)		glycodeoxycholate sulfate
	N-methylproline	deoxycarnitine		guanine
	N-stearoyl-sphingosine (d18:1/18:0)*	deoxycholate		homocitrulline
	oleoylcarnitine (C18:1)	diacylglycerol (14:0/18:1, 16:0/16:1) [2]*		HWESASXX*
	palmitoylcarnitine (C16)	dihomo-linoleate (20:2n6)		imidazole propionate
	palmitoyl-linoleoyl-glycerol (16:0/18:2) [1]*	dihydroferulic acid		indoleacetate
	palmitoyl-linoleoyl-glycerol (16:0/18:2) [2]*	dihydroorotate		lactate
	phenylpyruvate	docosadienoate (22:2n6)		lanthionine
	propyl 4-hydroxybenzoate sulfate	docosatrienoate (22:3n3)		linoleoylcarnitine (C18:2)*
	pyridoxate	docosatrienoate (22:3n6)*		malate
	pyruvate	eicosenoate (20:1)		myristoylcholine*
	ribonate	erucate (22:1n9)		N6,N6,N6-trimethyllysine
	S-1-pyrroline-5-carboxylate	ethylmalonate		N-acetylalliin
	spermidine	gamma-glutamyl-epsilon-lysine		N-acetylasparagine
	sphingomyelin (d17:2/16:0, d18:2/15:0)*	gamma-glutamylleucine		N-acetylcitrulline
	sphingomyelin (d18:1/18:1, d18:2/18:0)	glucuronate		N-acetylproline
	sphingomyelin (d18:1/24:1, d18:2/24:0)*	glutarate (pentanedioate)		N-behenoyl-sphingadienine (d18:2/22:0)*
	sphingomyelin (d18:2/14:0, d18:1/14:1)*	guanine		nervonate (24:1n9)*
	sphingomyelin (d18:2/23:0, d18:1/23:1, d17:1/24:1)*	hippurate		N-formylmethionine
	sphingomyelin (d18:2/24:1, d18:1/24:2)*	imidazole propionate		oleoylcarnitine (C18:1)
	stachydrine	indolin-2-one		palmitoleoylcarnitine (C16:1)*
	stearoylcarnitine (C18)	isobutyrylcarnitine (C4)		palmitoleoyl-oleoyl-glycerol (16:1/18:1) [1]*
	taurine	laurate (12:0)		perfluorooctanesulfonic acid (PFOS)
	thioproline	linolenate [alpha or gamma; (18:3n3 or 6)]		phenylacetylcarnitine
	threonine	linoleoyl-linoleoyl-glycerol (18:2/18:2) [1]*		phytanate
	vanillic alcohol sulfate	L-urobilin		pipecolate
	xanthine	maleate		pro-hydroxy-pro
		malonate		ribitol
		margarate (17:0)		salicylate
		methylphosphate		S-allylcysteine
		methylsuccinate		S-methylcysteine
		myristoleate (14:1n5)		spermidine
		myristoleoylcarnitine (C14:1)*		suberate (octanedioate)
		N1-Methyl-2-pyridone-5-carboxamide		succinate
		N1-Methyl-4-pyridone-3-carboxamide		tartarate
		N6,N6,N6-trimethyllysine		taurodeoxycholate
		N-acetyl-1-methylhistidine*		thyroxine
		N-acetyl-3-methylhistidine*		trans-4-hydroxyproline
		N-acetylarginine		trigonelline (N'-methylnicotinate)
		N-acetyl-aspartyl-glutamate (NAAG)		urea
		N-acetylneuraminate		ursodeoxycholate
		N-acetylproline
		N-acetyltryptophan
		nervonate (24:1n9)*
		N-formylanthranilic acid
		nonadecanoate (19:0)
		N-trimethyl 5-aminovalerate
		octanoylcarnitine (C8)
		oleate/vaccenate (18:1)
		O-sulfo-L-tyrosine
		palmitate (16:0)
		palmitoyl-arachidonoyl-glycerol (16:0/20:4) [1]*
		palmitoyl-arachidonoyl-glycerol (16:0/20:4) [2]*
		paraxanthine
		phenylacetylcarnitine
		phosphoethanolamine
		phytanate
		pimelate (heptanedioate)
		pristanate
		propionylcarnitine (C3)
		quinate
		salicylate
		stearate (18:0)
		sulfate*
		trigonelline (N'-methylnicotinate)
		urate
		uridine
		ursodeoxycholate
